# Supplementary material for: Can incontinence be cured? A systematic review of cure rates
Source: Springer Nature journal article supplement (doi:10.1186/s12916-017-0828-2), 2017-03-15
Supplement: MOESM2 [file 12172234]

Table S1: Characteristics of included studies

| STUDY ID                           | Population                                              | N   | Country                                                                                        | Intervention(s)                                                                                                                                                                                            |
|------------------------------------|---------------------------------------------------------|-----|------------------------------------------------------------------------------------------------|------------------------------------------------------------------------------------------------------------------------------------------------------------------------------------------------------------|
| #15549. Wagg 2014 <sup>23</sup>    | Elderly patients with overactive bladder                | 305 | EU (Portugal; Finland; Germany; Slovakia; UK; Denmark; Belgium; Spain; Italy; Austria; Sweden) | Fesoterodine (antimuscarinic)                                                                                                                                                                              |
| #11920 Chapple 2007a <sup>24</sup> | Elderly patients with overactive bladder                | 266 | USA, Poland, South Africa, Hungary, Sweden, UK, Germany                                        | Darifenacin (antimuscarinic)                                                                                                                                                                               |
| # 15558 Dubeau 2014 <sup>25</sup>  | Elderly                                                 | 562 | USA                                                                                            | Fesoterodine (antimuscarinic)                                                                                                                                                                              |
| #15559 Liao 2013 <sup>26</sup>     | Elderly, Frail elderly and younger than 65y (UUI)       | 166 | Taiwan                                                                                         | OnabotulinumtoxinA                                                                                                                                                                                         |
| #2918. Wexner 2010 <sup>27</sup>   | Faecal incontinence                                     | 129 | NR                                                                                             | Sacral nerve stimulation                                                                                                                                                                                   |
| #6392. Paquette 2014 <sup>28</sup> | Faecal incontinence                                     | 111 | NR                                                                                             | Sacral nerve stimulation                                                                                                                                                                                   |
| #10132. Graf 2011 <sup>29</sup>    | Faecal incontinence                                     | 206 | Sweden, USA, Germany                                                                           | Dextranomer (biomaterial to inject in anal submucosal)                                                                                                                                                     |
| #9773. Leroi 2012 <sup>16</sup>    | Faecal incontinence (neurological and non-neurological) | 73  | France                                                                                         | Transcutaneous electrical tibial nerve stimulation                                                                                                                                                         |
| #2779. Lacima 2010 <sup>30</sup>   | Faecal incontinence in non-neurological patients        | 79  | Spain                                                                                          | Biofeedback                                                                                                                                                                                                |
| #3161. Sze 2009 <sup>31</sup>      | Faecal incontinence in non-neurological patients        | 59  | USA                                                                                            | Methylcellulose and loperamide                                                                                                                                                                             |
| #3856. Byrne 2007 <sup>32</sup>    | Faecal incontinence in non-neurological patients        | 385 | Australia                                                                                      | Biofeedback                                                                                                                                                                                                |
| #11675. Tjandra 2008 <sup>33</sup> | Faecal incontinence in non-neurological patients        | 120 | Australia                                                                                      | Sacral Nerve Stimulation; Optimal medical therapy (bulking agents, pelvic floor exercises with a team of dedicated physiotherapists, and dietary management on fluid and fibres with a team of dieticians) |

| STUDY ID                             | Population                                    | N    | Country            | Intervention(s)                                                                                         |
|--------------------------------------|-----------------------------------------------|------|--------------------|---------------------------------------------------------------------------------------------------------|
| #1373. Damon 2014 <sup>34</sup>      | Faecal incontinence non-neurological          | 157  | France             | Standard conservative treatment; perineal retraining (biofeedback plus standard conservative treatment) |
| #2304. Uludag 2011 <sup>35</sup>     | Faecal incontinence non-neurological          | 50   | Netherlands        | Sacral neuromodulation                                                                                  |
| #2320. Boyle 2011 <sup>36</sup>      | Faecal incontinence non-neurological          | 50   | UK                 | Sacral Nerve Stimulation                                                                                |
| #13213. Faaborg 2009 <sup>37</sup>   | Faecal incontinence in neurological patients  | 211  | Denmark            | Transanal colonic irrigation                                                                            |
| #15557 Thomas 2014 <sup>38</sup>     | Urinary incontinence in neurological patients | 330  | UK                 | Systematic voiding programme (SVP), SVP and supported implementation and Usual continence care          |
| #11682 Sussman 2013 <sup>39</sup>    | Urinary incontinence in neurological patients | 166  | USA; Italy; Canada | OnabotulinumtoxinA 200U or 300U                                                                         |
| #11558. Staskin 2006 <sup>40</sup>   | MUI and overactive bladder                    | 319  | USA                | Solifenacin 5mg or 10mg (antimuscarinic)                                                                |
| #13156. Glazener 2014 <sup>41</sup>  | Unspecified postnatal UI, MUI                 | 230  | UK                 | Pelvic floor muscle training + bladder training                                                         |
| #11474. Moore 2008 <sup>42</sup>     | Unspecified UI postprostatectomy, MUI         | 106  | Canada             | Weekly postoperative pelvic floor muscle training (PFMT)                                                |
| #11477. Manassero 2007 <sup>43</sup> | Unspecified UI postprostatectomy, MUI         | 152  | Italy              | Early, intensive, prolonged pelvic floor exercises (PFE)                                                |
| #11505. Williams 2005 <sup>44</sup>  | Unspecified urinary incontinence, MUI         | 2240 | UK                 | Nurse-led continence Service                                                                            |
| #13488 Astellas Pharma <sup>45</sup> | MUI (post-prostatectomy)                      | 313  | USA, Canada        | Solifenacin (antimuscarinic)                                                                            |
| #4495. Abdel-Hady 2005 <sup>46</sup> | MUI, UII, SUI                                 | 454  | UK                 | Tension-free vaginal tape                                                                               |
| #1199. Schweitzer 2015 <sup>47</sup> | SUI                                           | 156  | Netherlands        | Adjustable Single-Incision sling; Transobturator Sling                                                  |
| #1334. Zuckerman 2014 <sup>48</sup>  | SUI                                           | 102  | USA                | Transobturator sling (AdVance)                                                                          |
| #1538. Mostafa 2013 <sup>49</sup>    | SUI                                           | 137  | UK                 | Single-incision Mini-sling; Tension-free Vaginal Tape-obturator                                         |
| #1571. Serati 2013 <sup>50</sup>     | SUI                                           | 263  | Italy              | Tension Free Vaginal Tape (Obturator) (TVT-O);                                                          |

| STUDY ID                               | Population | N   | Country        | Intervention(s)                                                                                                                       |
|----------------------------------------|------------|-----|----------------|---------------------------------------------------------------------------------------------------------------------------------------|
|                                        |            |     |                | antimuscarinic (unspecified)                                                                                                          |
| #1710. Tommaselli 2013 <sup>51</sup>   | SUI        | 110 | Italy          | Traditional vs. modified technique for TVT-O                                                                                          |
| #1728. Tommaselli 2013 <sup>52</sup>   | SUI        | 154 | Italy          | Tension-Free Vaginal Tape-O (TVT-O);                                                                                                  |
| #1904. Abdel-Fattah 2012 <sup>53</sup> | SUI        | 341 | UK             | Inside-out (TVT-O) vs outside-in (TOT-Aris) transobturator tension-free vaginal tape (TO-TVT)                                         |
| #1969. Cornu 2012 <sup>54</sup>        | SUI        | 95  | France, USA    | Adjust single incision transobturator sling procedure                                                                                 |
| #2258. Neuman 2011 <sup>55</sup>       | SUI        | 162 | Israel         | Tension-free vaginal tape–obturator (TVT-O) suburethral or mid-urethral tape operation.                                               |
| #2490. Bochove 2011 <sup>56</sup>      | SUI        | 95  | Netherlands    | Argus adjustable sling                                                                                                                |
| #2702. Guerrero 2010 <sup>57</sup>     | SUI        | 201 | UK             | TVT-TM, and autologous fascial slings                                                                                                 |
| #2950. Houwert 2010 <sup>58</sup>      | SUI        | 437 | Netherlands    | Retropubic tension-free vaginal tape (TVT); transobturator tape (TOT) [including 2: Monarc, and tension-free vaginal tape obturator]. |
| #2953. Krofta 2010 <sup>59</sup>       | SUI        | 300 | Czech Republic | Tension-free vaginal tape (TVT); inside-out transobturator midurethral sling TVT-O                                                    |
| #2955. North 2010 <sup>60</sup>        | SUI        | 60  | UK             | Single incision sling procedure (Minitape-TM)                                                                                         |
| #3257. Liebergall 2009 <sup>61</sup>   | SUI        | 245 | Israel         | Circular muscle exercises (Paula method); Pelvic Muscle Floor Training                                                                |
| #3620. Barry 2008 <sup>62</sup>        | SUI        | 187 | Australia      | Transobturator tape (Monarc®); tension-free vaginal tape (TVT®)                                                                       |
| #3630. Ward 2008 <sup>63</sup>         | SUI        | 344 | UK             | Tension-free vaginal tape ; colposuspension                                                                                           |
| #3914. Harms 2007 <sup>64</sup>        | SUI        | 177 | Germany        | Tension-free vaginal tape (TVT)                                                                                                       |
| #5274. Lee 2015 <sup>65</sup>          | SUI        | 225 | Australia      | Single incision midurethral sling (Miniarc); outside in transobturator midurethral sling (Monarc)                                     |
| #9658. Van Leijsen 2013 <sup>66</sup>  | SUI        | 126 | Netherlands    | Immediate midurethral sling surgery; individually tailored therapy ("state-of-the-art")                                               |
| #9689. Serra 2013 <sup>67</sup>        | SUI        | 61  | Spain          | Advance and Advance XP transobturator male sling                                                                                      |
| #9798. Masata 2012 <sup>68</sup>       | SUI        | 197 | Czech Republic | Tension-free vaginal tape obturator (TVT-O)                                                                                           |
| #11686. Carey 2006 <sup>69</sup>       | SUI        | 200 | Australia      | Laparoscopic Burch Colposuspension; Open Burch colposuspension                                                                        |

| STUDY ID                                      | Population                           | N   | Country                                                       | Intervention(s)                                                              |
|-----------------------------------------------|--------------------------------------|-----|---------------------------------------------------------------|------------------------------------------------------------------------------|
| #13090. Groutz 2011 <sup>70</sup>             | SUI                                  | 61  | Israel                                                        | Tension-free vaginal tape                                                    |
| #13133. Labrie 2013 <sup>71</sup>             | SUI                                  | 460 | Netherlands                                                   | Pelvic floor muscle training; midurethral sling surgery                      |
| #2539. Freeman 2011 <sup>72</sup>             | SUI                                  | 193 | UK                                                            | Retropubic (TVT) versus trans-obturator (TOT) mid-urethral slings            |
| #15548. Sjostrom 2015 <sup>73</sup>           | SUI                                  | 155 | Sweden                                                        | Internet-based PFMT<br>Postal PFMT                                           |
| #14621. NCT01272284 2011 <sup>74</sup>        | Female SUI                           | 112 | USA, Canada                                                   | Altis® Single Incision Sling System (SIS)                                    |
| #1656 Lee 2013 <sup>75</sup>                  | SUI                                  | 56  | South Korea                                                   | Extracorporeal biofeedback combined with pelvic floor muscle training (PFMT) |
| #10965 Viktrup 2007 <sup>76</sup>             | SUI                                  | 958 | Africa, Australia, Europe, North and South America            | Duloxetine                                                                   |
| #10419. Lanoe 2009 <sup>77</sup>              | Male SUI                             | 84  | France                                                        | Male sling (InVance)                                                         |
| #3326. Ghoniem 2009 <sup>78</sup>             | SUI + intrinsic sphincter deficiency | 147 | USA, Canada                                                   | Transurethral injection of bulking agents Macroplastique or Contigen®.       |
| #2053. Rehder 2012 <sup>79</sup>              | SUI postprostatectomy                | 156 | Austria, France, Italy, Germany                               | Transobturator Retroluminal Repositioning Sling Suspension (AdVance)         |
| #2979. Bauer 2009 <sup>80</sup>               | SUI postprostatectomy                | 113 | Germany                                                       | Functional Sling Suspension AdVance                                          |
| #11513. Filocamo 2007 <sup>81</sup>           | SUI postprostatectomy                | 50  | Italy                                                         | Duloxetine                                                                   |
| #3822. Kondo 2007 <sup>82</sup>               | SUI, MUI                             | 123 | Japan                                                         | Pelvic Floor Muscle Training                                                 |
| #4000. Primus 2006 <sup>83</sup>              | SUI, MUI                             | 103 | Austria                                                       | The SPARC Female Sling                                                       |
| #4019. Williams 2006 <sup>84</sup>            | SUI, MUI                             | 231 | UK                                                            | pelvic floor muscle therapies (PFMT)                                         |
| #4664. Natale 2014 <sup>85</sup>              | SUI, MUI                             | 92  | Italy                                                         | Single incision sling (Ajust™)                                               |
| #4757. Palomba 2014 <sup>86</sup>             | SUI, MUI                             | 209 | Italy                                                         | Single-incision mini-sling; retropubic tension-free vaginal tape             |
| #4991. Dias 2014 <sup>87</sup>                | SUI, MUI                             | 50  | Portugal                                                      | Altis® single-incision sling procedure                                       |
| #11523 Schagen van Leeuwen 2008 <sup>88</sup> | SUI/MUI (women of ≥65 years)         | 126 | Germany; France; The Netherlands; Spain; Sweden; Switzerland; | Duloxetine                                                                   |

| STUDY ID                                             | Population                                                   | N       | Country                                                                 | Intervention(s)                                                                                                                            |
|------------------------------------------------------|--------------------------------------------------------------|---------|-------------------------------------------------------------------------|--------------------------------------------------------------------------------------------------------------------------------------------|
|                                                      |                                                              |         | South-Africa.                                                           |                                                                                                                                            |
| #11411. Marchiori 2010 <sup>89</sup>                 | UI post prostatectomy, SUI                                   | 332     | Italy                                                                   | Post surgery tutored and personal trained pelvic floor re-educational program; pelvic floor exercises performed by patients on their own.  |
| #11577. Haab 2006 <sup>90</sup>                      | Overactive bladder, UUI                                      | 466     | France, Canada, USA, Denmark, Australia, Switzerland.                   | Darifenacin (antimuscarinic)                                                                                                               |
| #11438. Tincello 2012 <sup>91</sup>                  | Overactive bladder and Refractory detrusor overactivity, UUI | 100     | UK                                                                      | OnabotulinumtoxinA                                                                                                                         |
| #4293. Amundsen 2005 <sup>92</sup>                   | UUI                                                          | 55      | USA                                                                     | Sacral neuromodulation                                                                                                                     |
| #4552. Siegel 2015 <sup>93</sup>                     | UUI                                                          | 147     | USA                                                                     | Sacral neuromodulation (SNM); standard medical therapy with antimuscarinics (SMT)                                                          |
| #13577. New England Research Inst 2013 <sup>94</sup> | UUI                                                          | 118/119 | USA                                                                     | Tolterodine (antimuscarinic) + Behavioural training                                                                                        |
| #2358. Groen 2011 <sup>95</sup>                      | UUI (refractory idiopathic)                                  | 60      | Netherlands                                                             | Sacral Neuromodulation                                                                                                                     |
| #11496. Rogers 2009 <sup>96</sup>                    | UUI and overactive bladder                                   | 161     | USA                                                                     | Tolterodine ER (antimuscarinic)                                                                                                            |
| #10558. Surwit 2009 <sup>97</sup>                    | UUI, MUI                                                     | 256     | USA                                                                     | Percutaneous tibial nerve neuromodulation + pelvic floor muscle rehabilitation                                                             |
| #4217. Duckett 2006 <sup>98</sup>                    | UUI, SUI                                                     | 51      | UK                                                                      | Tension-free vaginal tape                                                                                                                  |
| #847. Glazener 2011 <sup>99</sup>                    | Unspecified urinary incontinence, MUI                        | 788     | UK                                                                      | PFMT (after Radical Prostatectomy)<br>Lifestyle advice (after Radical Prostatectomy)<br>PFMT (after TURP)<br>Lifestyle advice (after TURP) |
| #11434. Chapple 2013 <sup>100</sup>                  | UUI                                                          | 2382    | Europe, United States, Canada, South Africa, Australia, and New Zealand | Mirabegron 50 mg and 100 mg (Adrenergic) and Tolterodine ER 4 mg (antimuscarinic)                                                          |
| #15546. Drake 2015 <sup>101</sup>                    | UUI                                                          | 1004    | NR/Unclear                                                              | Solifenacin 6mg (antimuscarinic) and Tamsulosin 0.4mg                                                                                      |

| STUDY ID                                 | Population | N    | Country                                               | Intervention(s)                                                                               |
|------------------------------------------|------------|------|-------------------------------------------------------|-----------------------------------------------------------------------------------------------|
| #15547. Visco 2012 <sup>102</sup>        | UUI        | 119  | USA                                                   | Anticholinergic drug                                                                          |
| #9683 Nitti 2013 <sup>103</sup>          | UUI        | 280  | USA; Canada                                           | OnabotulinumtoxinA                                                                            |
| #11452 Rovner 2011 <sup>104</sup>        | UUI        | 269  | USA; Canada; Europe                                   | OnabotulinumtoxinA 50U, 100U, 150U, 200U and 300U                                             |
| #11509 Herschorn 2010 <sup>105</sup>     | UUI        | 1277 | NR                                                    | Tolterodine ER and Fesoterodine (antimuscarinic)                                              |
| #15555 Chapple 2014 <sup>106</sup>       | UUI        | 1955 | Worldwide(27 countries)                               | Fesoterodine 4mg and 8mg (antimuscarinic)                                                     |
| #11120 Anderson 2006 <sup>107</sup>      | UUI        | 790  | USA                                                   | Oxybutynin and Tolterodine ER (antimuscarinic); with or without prior anticholinergic therapy |
| #15552 Herschorn 2013 <sup>108</sup>     | UUI        | 511  | North America, Europe                                 | Mirabegron 25 mg and 50 mg (Adrenergic)                                                       |
| #11576 Chapple 2005 <sup>109</sup>       | UUI        | 1177 | Europe                                                | Solifenacin and Tolterodine ER (antimuscarinic)                                               |
| #10668 Chapple 2007 <sup>110</sup>       | UUI        | 824  | Europe, South Africa, Australia, and New Zealand      | Tolterodine ER and Fesoterodine 4mg and 8mg (antimuscarinic)                                  |
| #14046 Janssen Korea 2013 <sup>111</sup> | OAB+UUI    | 309  | South Korea                                           | Oxybutynin (antimuscarinic)                                                                   |
| #6213 Sand 2012 <sup>112</sup>           | OAB +UUI   | 280  | USA                                                   | OnabotulinumtoxinA                                                                            |
| #10091 Staskin 2011 <sup>113</sup>       | UUI        | 168  | Worldwide                                             | Fesoterodine (antimuscarinic)                                                                 |
| #10655 Karram 2009 <sup>114</sup>        | OAB+UUI    | 229  | USA                                                   | Solifenacin (antimuscarinic)                                                                  |
| #10579 Wyndaele 2009 <sup>115</sup>      | OAB+UUI    | 474  | Asia, Europe, and North and Central America           | Fesoterodine (antimuscarinic)                                                                 |
| #11732 Yamaguchi 2007 <sup>116</sup>     | OAB+UUI    | 713  | Japan                                                 | Solifenacin 5mg or 10mg (antimuscarinic)                                                      |
| #10812 Dmochowski 2008 <sup>117</sup>    | UUI        | 267  | USA                                                   | Trospium (antimuscarinic)                                                                     |
| #11473 Kaplan 2011 <sup>118</sup>        | UUI        | 1834 | North America, South America, Europe, Asia and Africa | Tolterodine ER and Fesoterodine (antimuscarinic)                                              |
| #15553 Staskin 2007 <sup>119</sup>       | UUI        | 292  | USA                                                   | Trospium (antimuscarinic)                                                                     |

Table S2: Risk of bias of included studies

| Study name                         | Endnote | Questions |   |   |   |   |   |   |   |    |    |    |    |    |    |    |    |    |    |    | No. "L" | No. "H" | No. "U" |    |
|------------------------------------|---------|-----------|---|---|---|---|---|---|---|----|----|----|----|----|----|----|----|----|----|----|---------|---------|---------|----|
|                                    |         | 1         | 2 | 3 | 4 | 5 | 6 | 8 | 9 | 11 | 12 | 13 | 14 | 15 | 16 | 19 | 20 | 23 | 25 | 26 |         |         |         | 28 |
| Abdel-fattah 2012 <sup>53</sup>    | #1904   | L         | L | L | L | U | U | U | H | L  | U  | L  | U  | H  | L  | U  | L  | U  | U  | H  | L       | 9       | 3       | 8  |
| Abdel-Hady 2005 <sup>46</sup>      | #4495   | L         | L | L | L | H | H | L | L | U  | U  | L  | U  | H  | L  | U  | H  | H  | U  | L  | L       | 10      | 4       | 6  |
| Amundsen 2005 <sup>92</sup>        | #4293   | L         | L | L | L | U | U | L | L | L  | H  | L  | U  | H  | L  | L  | L  | H  | U  | L  | L       | 13      | 3       | 4  |
| Anderson 2006 <sup>107</sup>       | #11120  | L         | U | L | L | L | H | L | L | U  | L  | L  | U  | U  | H  | U  | U  | U  | U  | H  | L       | 9       | 3       | 8  |
| Astellas Pharma 2014 <sup>45</sup> | #13488  | L         | L | L | U | L | L | L | L | U  | L  | U  | L  | L  | L  | U  | L  | U  | U  | U  | L       | 13      | 0       | 7  |
| Barry 2008 <sup>62</sup>           | #3620   | L         | L | L | L | L | L | H | L | U  | L  | L  | U  | H  | L  | U  | H  | L  | U  | L  | L       | 13      | 3       | 4  |
| Bauer 2009 <sup>80</sup>           | #2979   | L         | L | L | L | H | L | H | L | U  | L  | L  | U  | H  | L  | U  | L  | H  | U  | L  | L       | 12      | 4       | 4  |
| Bochove-Overg. 2011 <sup>56</sup>  | #2490   | L         | L | L | L | U | L | L | L | U  | L  | L  | U  | H  | L  | U  | L  | H  | U  | L  | L       | 13      | 2       | 5  |
| Boyle 2011 <sup>36</sup>           | #2320   | L         | L | L | L | U | L | H | L | U  | L  | L  | U  | H  | L  | U  | L  | H  | U  | L  | L       | 12      | 3       | 5  |
| Byrne 2007 <sup>32</sup>           | #3856   | L         | L | L | L | L | L | H | L | U  | L  | L  | U  | L  | L  | L  | H  | H  | U  | L  | L       | 14      | 3       | 3  |
| Carey 2006 <sup>69</sup>           | #11686  | L         | L | L | L | L | L | L | L | U  | L  | L  | L  | L  | L  | L  | L  | L  | L  | L  | L       | 19      | 0       | 1  |
| Chapple 2005 <sup>109</sup>        | #11576  | L         | L | H | L | U | H | L | U | U  | L  | L  | L  | L  | L  | U  | L  | L  | U  | H  | L       | 12      | 3       | 5  |
| Chapple 2007a <sup>24</sup>        | #11920  | L         | L | L | L | L | L | L | L | U  | L  | L  | L  | L  | H  | U  | L  | U  | U  | L  | L       | 15      | 1       | 4  |
| Chapple 2007b <sup>110</sup>       | #10668  | L         | L | L | L | L | U | L | U | U  | L  | L  | L  | L  | H  | U  | L  | U  | U  | H  | L       | 12      | 2       | 6  |
| Chapple 2013 <sup>100</sup>        | #11434  | L         | L | L | U | L | L | L | L | U  | L  | L  | L  | L  | L  | L  | L  | L  | L  | L  | L       | 18      | 0       | 2  |
| Chapple 2014 <sup>106</sup>        | # 15555 | L         | L | L | L | L | L | L | L | U  | L  | U  | L  | L  | L  | U  | L  | L  | U  | H  | L       | 15      | 1       | 4  |
| Cornu 2012 <sup>54</sup>           | #1969   | L         | L | L | L | U | L | L | L | U  | L  | L  | U  | H  | L  | U  | U  | H  | U  | L  | L       | 12      | 2       | 6  |
| Damon 2014 <sup>34</sup>           | #1373   | L         | L | L | L | L | L | L | L | L  | L  | L  | U  | H  | L  | U  | L  | L  | L  | L  | L       | 17      | 1       | 2  |
| Dias 2014 <sup>87</sup>            | #4991   | L         | L | L | L | U | L | L | L | U  | L  | L  | U  | H  | L  | L  | L  | H  | U  | L  | L       | 14      | 2       | 4  |
| Dmochowski 2008 <sup>117</sup>     | #10812  | L         | L | L | L | L | L | L | H | U  | L  | L  | L  | L  | L  | L  | L  | U  | U  | H  | L       | 15      | 2       | 3  |
| Drake 2015 <sup>101</sup>          | #15546  | L         | L | L | L | L | L | L | L | U  | U  | L  | U  | H  | L  | U  | L  | H  | U  | L  | L       | 13      | 2       | 5  |
| DuBeau 2014 <sup>25</sup>          | #15558  | L         | L | L | L | L | L | L | L | U  | L  | L  | L  | U  | L  | U  | L  | L  | U  | L  | L       | 16      | 0       | 4  |
| Duckett 2006 <sup>98</sup>         | #4217   | L         | L | L | L | L | L | H | L | U  | L  | L  | U  | H  | L  | U  | L  | H  | U  | L  | L       | 13      | 3       | 4  |
| Faaborg 2009 <sup>37</sup>         | #13213  | L         | L | L | L | U | L | L | U | U  | U  | L  | U  | H  | L  | U  | H  | H  | U  | U  | L       | 9       | 3       | 8  |
| Filocamo 2007 <sup>81</sup>        | #11513  | L         | L | L | L | U | L | L | L | U  | L  | L  | L  | H  | L  | H  | L  | U  | U  | L  | L       | 14      | 2       | 4  |

| Study name                        | Endnote | Questions |   |   |   |   |   |   |   |    |    |    |    |    |    |    |    |    |    |    | No. "L" | No. "H" | No. "U" |    |
|-----------------------------------|---------|-----------|---|---|---|---|---|---|---|----|----|----|----|----|----|----|----|----|----|----|---------|---------|---------|----|
|                                   |         | 1         | 2 | 3 | 4 | 5 | 6 | 8 | 9 | 11 | 12 | 13 | 14 | 15 | 16 | 19 | 20 | 23 | 25 | 26 |         |         |         | 28 |
| Freeman 2011 <sup>72</sup>        | #2539   | L         | L | L | U | U | L | L | L | U  | L  | L  | U  | H  | L  | U  | U  | L  | U  | L  | L       | 12      | 1       | 7  |
| Ghoniem 2009 <sup>78</sup>        | #3326   | L         | L | L | L | L | L | L | L | U  | L  | L  | L  | H  | L  | L  | L  | U  | U  | L  | L       | 16      | 1       | 3  |
| Glazener 2014 <sup>41</sup>       | #13156  | L         | L | L | L | L | L | L | L | L  | H  | L  | U  | H  | L  | L  | H  | L  | U  | H  | L       | 14      | 4       | 2  |
| Glazener 2011 <sup>99</sup>       | #847    | L         | L | L | L | L | L | L | L | L  | L  | L  | U  | H  | L  | L  | L  | L  | L  | L  | L       | 18      | 1       | 1  |
| Graf 2011 <sup>29</sup>           | #10132  | L         | L | L | L | L | L | L | L | U  | L  | L  | L  | U  | L  | L  | L  | L  | U  | L  | L       | 17      | 0       | 3  |
| Groen 2011 <sup>95</sup>          | #2358   | L         | L | L | L | U | L | L | L | U  | L  | L  | U  | H  | L  | U  | L  | H  | U  | L  | L       | 13      | 2       | 5  |
| Grouztz 2011 <sup>70</sup>        | #13090  | L         | L | L | L | L | L | H | L | L  | L  | L  | U  | H  | L  | L  | L  | H  | U  | L  | L       | 15      | 3       | 2  |
| Guerrero 2010 <sup>57</sup>       | #2702   | L         | L | L | L | L | L | H | L | U  | L  | L  | U  | H  | L  | U  | U  | L  | U  | L  | L       | 13      | 2       | 5  |
| Haab 2006 <sup>90</sup>           | #11577  | L         | L | L | L | L | L | L | H | U  | H  | U  | U  | H  | L  | U  | L  | H  | U  | H  | L       | 10      | 5       | 5  |
| Harms 2007 <sup>64</sup>          | #3914   | L         | L | L | L | L | L | L | L | U  | H  | L  | U  | H  | L  | U  | L  | H  | U  | L  | L       | 13      | 3       | 4  |
| Herschorn 2010 <sup>105</sup>     | #11509  | L         | L | L | L | L | L | L | L | U  | L  | U  | L  | U  | H  | U  | L  | L  | U  | H  | L       | 13      | 2       | 5  |
| Herschorn 2013 <sup>108</sup>     | #15552  | L         | L | U | L | L | L | L | L | U  | L  | L  | L  | L  | L  | U  | L  | U  | U  | H  | L       | 15      | 1       | 5  |
| Houwert 2010 <sup>58</sup>        | #2950   | L         | L | L | L | L | L | L | L | U  | L  | L  | U  | H  | L  | U  | U  | H  | L  | L  | L       | 14      | 2       | 4  |
| Janssen Korea 2013 <sup>111</sup> | #14046  | L         | L | U | L | H | L | L | L | U  | H  | L  | H  | H  | L  | U  | L  | U  | U  | H  | L       | 10      | 5       | 5  |
| Kaplan 2011 <sup>118</sup>        | #11473  | L         | L | L | L | L | H | L | L | U  | L  | L  | L  | L  | L  | U  | L  | U  | U  | H  | L       | 14      | 2       | 4  |
| Karram 2009 <sup>114</sup>        | #10655  | L         | L | U | L | H | L | L | H | U  | U  | L  | L  | L  | H  | U  | L  | U  | U  | L  | L       | 11      | 3       | 6  |
| Kondo 2007 <sup>82</sup>          | #3822   | L         | L | L | L | L | L | H | L | U  | L  | L  | U  | H  | L  | U  | H  | H  | U  | L  | L       | 12      | 4       | 4  |
| Krofta 2010b <sup>59</sup>        | #2953   | L         | L | L | L | L | L | L | L | U  | L  | L  | U  | H  | L  | U  | L  | L  | U  | L  | L       | 15      | 1       | 4  |
| Labrie 2013 <sup>71</sup>         | #13133  | L         | L | L | L | L | L | L | L | L  | L  | L  | U  | H  | H  | L  | L  | L  | U  | L  | L       | 16      | 2       | 2  |
| Lacima 2010 <sup>30</sup>         | #2779   | L         | L | L | L | U | L | H | L | U  | L  | L  | U  | H  | L  | U  | U  | H  | U  | L  | L       | 11      | 6       | 3  |
| Lanoe 2009 <sup>77</sup>          | #10419  | L         | L | L | L | L | L | L | L | L  | L  | L  | U  | H  | L  | U  | L  | H  | L  | L  | L       | 16      | 2       | 2  |
| Lee 2013 <sup>75</sup>            | #1656   | L         | L | L | L | L | L | L | L | U  | H  | L  | U  | H  | L  | L  | L  | H  | U  | H  | L       | 13      | 4       | 3  |
| Lee 2015 <sup>65</sup>            | #5274   | L         | L | L | L | L | L | L | L | U  | L  | L  | U  | H  | L  | L  | L  | L  | L  | L  | L       | 17      | 1       | 2  |
| Leroi 2012 <sup>16</sup>          | #9773   | L         | L | L | L | L | L | L | L | L  | L  | L  | L  | L  | L  | L  | L  | U  | U  | L  | L       | 18      | 0       | 2  |
| Liao 2013 <sup>26</sup>           | #15559  | L         | L | L | L | L | L | L | L | U  | L  | L  | H  | H  | L  | U  | L  | H  | U  | L  | L       | 14      | 3       | 3  |
| Liebergall 2013 <sup>61</sup>     | #3257   | L         | L | L | L | L | L | H | L | U  | L  | L  | U  | H  | L  | U  | H  | H  | U  | L  | L       | 12      | 4       | 4  |



| Study name                             | Endnote | Questions |   |   |   |   |   |   |   |    |    |    |    |    |    |    |    |    |    |    | No. "L" | No. "H" | No. "U" |    |
|----------------------------------------|---------|-----------|---|---|---|---|---|---|---|----|----|----|----|----|----|----|----|----|----|----|---------|---------|---------|----|
|                                        |         | 1         | 2 | 3 | 4 | 5 | 6 | 8 | 9 | 11 | 12 | 13 | 14 | 15 | 16 | 19 | 20 | 23 | 25 | 26 |         |         |         | 28 |
| Manassero 2007 <sup>43</sup>           | #11477  | L         | L | L | L | L | L | H | L | L  | L  | L  | U  | L  | L  | L  | L  | U  | L  | L  | L       | 17      | 1       | 2  |
| Marchiori 2010 <sup>89</sup>           | #11411  | L         | L | L | L | L | U | H | L | L  | L  | L  | U  | H  | L  | H  | L  | U  | U  | L  | L       | 13      | 4       | 3  |
| Masata 2012 <sup>68</sup>              | #9798   | L         | L | U | L | L | L | L | L | H  | L  | L  | U  | H  | L  | L  | L  | L  | U  | L  | L       | 15      | 2       | 3  |
| Moore 2008 <sup>42</sup>               | #11474  | L         | L | H | L | U | L | L | H | U  | H  | L  | U  | L  | L  | L  | L  | L  | L  | H  | L       | 13      | 4       | 3  |
| Mostafa 2013 <sup>49</sup>             | #1538   | L         | L | L | L | U | L | U | L | L  | L  | L  | U  | H  | L  | U  | L  | L  | U  | L  | L       | 14      | 1       | 5  |
| Natale 2014 <sup>85</sup>              | #4664   | L         | L | L | L | L | L | L | L | U  | L  | L  | U  | H  | L  | L  | L  | H  | U  | L  | L       | 15      | 3       | 2  |
| NCT00090584 2013 <sup>94</sup>         | #13577  | L         | L | L | L | U | L | U | L | L  | L  | U  | U  | H  | L  | U  | L  | L  | U  | L  | L       | 13      | 1       | 6  |
| Neuman 2011 <sup>55</sup>              | #2258   | L         | L | L | H | L | L | L | L | U  | U  | L  | U  | H  | L  | U  | U  | H  | H  | L  | L       | 11      | 4       | 5  |
| NCT01272284 2011 <sup>74</sup>         | # 14621 | L         | L | L | L | U | L | L | L | U  | L  | L  | U  | H  | L  | U  | L  | U  | U  | L  | L       | 13      | 1       | 6  |
| Nitti 2013 <sup>103</sup>              | #9683   | L         | L | L | L | L | L | L | L | U  | L  | L  | L  | L  | L  | L  | L  | U  | U  | L  | L       | 17      | 0       | 3  |
| North 2010 <sup>60</sup>               | #2955   | L         | L | L | U | H | L | H | L | U  | L  | L  | U  | H  | L  | U  | L  | H  | U  | H  | L       | 10      | 5       | 5  |
| Palomba 2014 <sup>86</sup>             | #4757   | L         | L | L | L | L | L | L | L | L  | L  | L  | U  | L  | L  | L  | L  | H  | U  | L  | L       | 17      | 1       | 2  |
| Paquette 2014 <sup>28</sup>            | #6392   | L         | H | L | L | U | L | L | U | L  | U  | U  | U  | U  | L  | L  | L  | H  | U  | U  | U       | 9       | 2       | 9  |
| Primus 2006 <sup>83</sup>              | #4000   | L         | L | L | L | L | L | L | L | U  | L  | L  | U  | H  | L  | U  | L  | H  | U  | L  | L       | 14      | 2       | 4  |
| Rehder 2012 <sup>79</sup>              | #2053   | L         | L | L | L | U | L | L | L | U  | L  | L  | U  | H  | L  | U  | U  | H  | U  | L  | L       | 12      | 2       | 6  |
| Rogers 2009 <sup>96</sup>              | #11496  | L         | L | L | L | U | L | L | L | U  | L  | L  | U  | U  | L  | L  | L  | H  | U  | L  | L       | 14      | 1       | 5  |
| Rovner 2011 <sup>104</sup>             | #11452  | L         | L | L | L | L | L | L | L | U  | L  | L  | L  | L  | H  | U  | L  | U  | U  | L  | L       | 15      | 1       | 4  |
| Sand 2012 <sup>112</sup>               | #6213   | L         | L | U | L | H | H | H | U | U  | U  | U  | L  | U  | L  | U  | L  | U  | U  | U  | L       | 7       | 3       | 10 |
| Schagen van Leeuwen 2008 <sup>88</sup> | #11523  | L         | L | L | L | L | L | L | L | U  | L  | L  | L  | L  | L  | L  | L  | U  | U  | L  | L       | 17      | 0       | 3  |
| Schweitzer 2015 <sup>47</sup>          | #1199   | L         | L | L | U | U | L | L | U | L  | U  | L  | L  | H  | L  | U  | L  | L  | U  | H  | L       | 12      | 2       | 6  |
| Serati 2013 <sup>50</sup>              | #1571   | L         | L | L | L | U | L | U | L | L  | L  | L  | U  | H  | L  | U  | L  | L  | U  | L  | L       | 14      | 1       | 5  |
| Serra 2013 <sup>67</sup>               | #9689   | L         | L | L | L | L | L | L | L | L  | L  | L  | U  | H  | L  | L  | L  | H  | U  | L  | L       | 16      | 2       | 2  |
| Siegel 2015 <sup>93</sup>              | #4552   | L         | L | L | U | L | L | L | L | U  | U  | L  | U  | H  | L  | U  | L  | U  | H  | L  | L       | 12      | 2       | 6  |
| Sjostrom 2015 <sup>73</sup>            | #15548  | L         | L | L | L | L | L | L | L | U  | H  | L  | U  | H  | L  | U  | L  | L  | U  | H  | L       | 13      | 3       | 4  |
| Staskin 2006 <sup>40</sup>             | #11558  | L         | L | H | H | H | L | L | H | U  | U  | U  | U  | U  | H  | H  | L  | H  | U  | U  | L       | 6       | 7       | 7  |

| Study name                     | Endnote | Questions |   |   |   |   |   |   |   |    |    |    |    |    |    |    |    |    |    |    |    | No. "L" | No. "H" | No. "U" |
|--------------------------------|---------|-----------|---|---|---|---|---|---|---|----|----|----|----|----|----|----|----|----|----|----|----|---------|---------|---------|
|                                |         | 1         | 2 | 3 | 4 | 5 | 6 | 8 | 9 | 11 | 12 | 13 | 14 | 15 | 16 | 19 | 20 | 23 | 25 | 26 | 28 |         |         |         |
| Staskin 2007 <sup>119</sup>    | #15553  | L         | L | U | L | U | L | L | L | U  | L  | L  | L  | L  | L  | U  | L  | L  | U  | H  | L  | 14      | 1       | 5       |
| Staskin 2011 <sup>113</sup>    | #10091  | L         | L | L | L | L | L | L | L | U  | H  | L  | L  | L  | H  | U  | L  | U  | U  | H  | L  | 13      | 3       | 4       |
| Surwitt 2009 <sup>97</sup>     | #10558  | L         | L | U | L | H | L | L | L | U  | L  | L  | U  | H  | L  | H  | L  | H  | U  | L  | L  | 12      | 4       | 4       |
| Sussman 2013 <sup>39</sup>     | #11682  | L         | L | L | U | L | L | H | L | U  | U  | L  | L  | L  | L  | U  | L  | U  | U  | L  | L  | 15      | 1       | 6       |
| Sze 2009 <sup>31</sup>         | #3161   | L         | L | L | L | H | L | H | H | U  | L  | L  | U  | H  | L  | U  | U  | H  | U  | H  | L  | 9       | 5       | 6       |
| Thomas 2014 <sup>38</sup>      | #15557  | L         | L | U | L | L | L | H | U | U  | U  | U  | U  | H  | L  | U  | L  | U  | L  | H  | L  | 9       | 3       | 8       |
| Tijandra 2008 <sup>33</sup>    | #11675  | L         | L | L | L | L | H | L | U | U  | U  | L  | U  | H  | L  | U  | L  | U  | U  | U  | L  | 10      | 2       | 8       |
| Tincello 2012 <sup>91</sup>    | #11438  | L         | L | L | L | L | L | L | H | U  | H  | L  | L  | L  | L  | L  | L  | L  | U  | H  | L  | 15      | 3       | 2       |
| Tommaselli 2013b <sup>52</sup> | #1728   | L         | L | L | U | U | L | L | L | L  | U  | L  | L  | L  | L  | U  | L  | U  | U  | H  | L  | 13      | 2       | 5       |
| Tommaselli 2013 <sup>51</sup>  | #1710   | L         | L | L | L | L | L | L | L | U  | L  | L  | U  | L  | L  | U  | L  | L  | H  | L  | L  | 16      | 1       | 3       |
| Uludag 2011 <sup>35</sup>      | #2304   | L         | L | H | H | U | L | H | H | U  | L  | L  | U  | H  | L  | U  | L  | H  | U  | H  | L  | 8       | 7       | 5       |
| Van Leijsen 2013 <sup>66</sup> | #9658   | L         | L | L | U | U | L | H | L | L  | H  | L  | U  | L  | L  | L  | L  | L  | U  | H  | L  | 13      | 3       | 4       |
| Viktrup 2007 <sup>76</sup>     | #10965  | L         | L | H | L | H | L | L | L | U  | U  | L  | U  | U  | H  | U  | L  | H  | U  | L  | L  | 10      | 4       | 6       |
| Visco 2012 <sup>102</sup>      | #15547  | L         | L | L | L | L | L | L | L | U  | L  | L  | L  | L  | L  | U  | L  | L  | L  | L  | L  | 18      | 0       | 2       |
| Wagg 2014 <sup>23</sup>        | # 15549 | L         | L | L | L | U | U | L | L | U  | U  | L  | H  | H  | L  | U  | L  | U  | U  | H  | L  | 10      | 3       | 7       |
| Ward 2008 <sup>63</sup>        | #3630   | L         | L | H | H | H | L | L | L | U  | L  | L  | U  | H  | L  | U  | L  | L  | U  | L  | L  | 12      | 4       | 4       |
| Wexner 2010 <sup>27</sup>      | #2918   | L         | L | L | L | L | L | L | H | U  | H  | L  | U  | H  | L  | L  | L  | H  | U  | H  | L  | 12      | 5       | 3       |
| Williams 2005 <sup>44</sup>    | #11505  | L         | L | L | U | L | L | H | L | L  | L  | L  | U  | L  | L  | H  | L  | L  | U  | L  | L  | 15      | 2       | 3       |
| Williams 2006 <sup>84</sup>    | #4019   | L         | L | L | L | L | L | L | L | L  | L  | L  | U  | H  | L  | L  | H  | L  | U  | L  | L  | 16      | 2       | 2       |
| Wyndaele 2009 <sup>115</sup>   | #10579  | L         | L | L | L | L | L | L | L | U  | L  | L  | H  | H  | H  | U  | L  | H  | U  | L  | L  | 13      | 4       | 3       |
| Yamaguchi 2007 <sup>116</sup>  | #11732  | L         | L | L | L | L | L | L | L | U  | L  | L  | L  | L  | L  | U  | L  | U  | U  | L  | L  | 16      | 0       | 4       |
| Zuckerman 2014 <sup>48</sup>   | #1334   | L         | L | L | L | L | L | U | L | L  | L  | L  | U  | H  | L  | U  | L  | L  | U  | L  | L  | 15      | 1       | 4       |

H=High Risk; L=Low Risk; U=Unclear Risk; No=Number

Table S3: Study characteristics for female and male patients with SUI

| Study name                             | Endnote | N           | Inclusion criteria                                                                                                                                                                                                                                                                                                                                                                                                                     | Mean/<br>Median<br>age (yrs) | % of<br>males | RoB<br>No.<br>Low * |
|----------------------------------------|---------|-------------|----------------------------------------------------------------------------------------------------------------------------------------------------------------------------------------------------------------------------------------------------------------------------------------------------------------------------------------------------------------------------------------------------------------------------------------|------------------------------|---------------|---------------------|
| <b>WOMEN</b>                           |         |             |                                                                                                                                                                                                                                                                                                                                                                                                                                        |                              |               |                     |
| Carey 2006 <sup>69</sup>               | #11686  | 167         | Women with USI; failed conservative therapy                                                                                                                                                                                                                                                                                                                                                                                            | 52.3/ 51.0                   | 0             | 19                  |
| Palomba 2014 <sup>86</sup>             | #4757   | 209         | Diagnosis of SUI/MUI confirmed by urodynamic assessment; incontinent after conservative management, in MUI -persistent, clinically significant SUI under oral antimuscarinic therapy                                                                                                                                                                                                                                                   | 64.1 /63.8                   | 0             | 17                  |
| Lee 2015 <sup>65</sup>                 | #5274   | 206         | SUI or urodynamic SUI                                                                                                                                                                                                                                                                                                                                                                                                                  | 51.6                         | 0             | 17                  |
| Schagen van Leeuwen 2008 <sup>88</sup> | #11523  | 126         | Community-dwelling women of ≥65 years with symptoms of SUI or S-MUI for≥3 consecutive months and ≥7 incontinence episodes per week as determined by the stress/urge incontinence questionnaire S/UIQ were eligible. For patients in the S-MUI group, ≥50% of incontinence episodes had to be due to stress.                                                                                                                            | 70.6                         | 0             | 17                  |
| Ghoniem 2009 <sup>78</sup>             | #3326   | 247         | SUI primarily due to ISD; no improvement with conservative treatments; viable mucosal lining and normal bladder capacity. Extension: p.1448: Reported success (Stamey grade improvement) from baseline; Primary diagnosis of SUI, primarily due to ISD; <90 cm H2O leak point pressure; >25 cm H2O detrusor pressure;SUI not improved by prior conservative therapy or surgery;Viable urethral mucosal lining; Normal bladder capacity | 60.7 /61.3                   | 0             | 16                  |
| Williams 2006 <sup>84</sup>            | #4019   | 238         | Women with a urodynamic diagnosis of USI or mixed UI and DO who had already had an 8-week primary-care intervention.                                                                                                                                                                                                                                                                                                                   | 56.7                         | 0             | 16                  |
| Labrie 2013 <sup>71</sup>              | #13133  | 174         | Age 35-80; SUI moderate or severe according to Sandvik index; in case of MUI SUI predominant (more SUI than UUI episodes); no previous treatment or physiotherapy > 6 months before randomization.                                                                                                                                                                                                                                     | 50.0                         | 0             | 16                  |
| Tommaselli 2013 <sup>51</sup>          | #1710   | 55/<br>55   | SUI as diagnosed by clinical evaluation and urodynamics, age > 30 years, and previously failed pelvic floor muscle training.                                                                                                                                                                                                                                                                                                           | 59.6/ 62.5                   | 0             | 16                  |
| Krofta 2010b <sup>59</sup>             | #2953   | 149/<br>151 | All women who had urodynamically proven primary SUI including a positive stress test were candidates for inclusion. Surgery was only offered if conservative therapy was unsuccessful.                                                                                                                                                                                                                                                 | 57.2/57.8                    | 0             | 15                  |
| Masata 2012 <sup>68</sup>              | #9798   | 197         | Age >18 years; urodynamic SUI; agreement with postoperative follow-up;                                                                                                                                                                                                                                                                                                                                                                 | 56.5                         | 0             | 15                  |
| Natale 2014 <sup>85</sup>              | #4664   | 92          | Females with primary stress urinary incontinence (SUI) or mixed urinary incontinence with predominant SUI, diagnosed using both the cough stress test and urodynamics. All had unsuccessfully undergone prior pelvic floor training                                                                                                                                                                                                    | 58                           | 0             | 15                  |

| Study name                        | Endnote | N                | Inclusion criteria                                                                                                                                                                                                                                                                                                                                                              | Mean/<br>Median<br>age (yrs) | % of<br>males | RoB<br>No.<br>Low * |
|-----------------------------------|---------|------------------|---------------------------------------------------------------------------------------------------------------------------------------------------------------------------------------------------------------------------------------------------------------------------------------------------------------------------------------------------------------------------------|------------------------------|---------------|---------------------|
| Groutz<br>2011 <sup>70</sup>      | #13090  | 61               | Women who underwent TVT-O during the year 2005 for urodynamically confirmed overt SUI or MUI with predominant SUI; failed conservative treatment                                                                                                                                                                                                                                | 56.6                         | 0             | 15                  |
| Houwert<br>2009b <sup>58</sup>    | #2950   | 437              | All women had symptoms of predominant SUI. Three hundred forty-three women (79%) had symptoms of pure SUI and 94 women (21%) had symptoms of mixed urinary incontinence (MUI). In women with MUI, anticholinergic medical treatment was given before surgical treatment was considered and did not alleviate their symptoms.                                                    | 51.1                         | 0             | 14                  |
| Serati 2013 <sup>50</sup>         | #1571   | 196              | Women who complained of pure SUI symptoms without any other urinary disorder                                                                                                                                                                                                                                                                                                    | 55 (Med)                     | NR            | 14                  |
| Mostafa<br>2013 <sup>49</sup>     | #1538   | 137              | All women admitted for surgical treatment of urodynamic SUI as a sole procedure were invited to participate in this study. All women have failed or declined pelvic floor muscle training.                                                                                                                                                                                      | 51                           | 0             | 14                  |
| Primus<br>2006 <sup>83</sup>      | #4000   | 103              | Women who presented with urinary incontinence symptoms, including genuine, recurrent or mixed stress. All patients had unsuccessfully attempted treating their symptoms using pelvic floor exercises. Patients who indicated that these symptoms represented a significant negative impact on their life and who expressed a strong desire to have the operation were included. | 60.2                         | 0             | 14                  |
| Dias 2014 <sup>87</sup>           | #4991   | 50               | Age >18 years; a history of clinically pure SUI or MUI with predominantly bothersome SUI symptoms; a positive cough stress test (CST) with clinical hypermobility of the urethra; previous failed or denied conservative therapy                                                                                                                                                | 53.2                         | 0             | 14                  |
| Van Leijsen<br>2013 <sup>66</sup> | #9658   | 508              | Women with uncomplicated SUI (pure SUI or MUI with predominant SUI); failed conservative therapy; candidates for surgery; SUI on physical examination or indicated on bladder diary                                                                                                                                                                                             | 55/54/52<br>/51              | 0             | 13                  |
| Tommaselli<br>2013 <sup>52</sup>  | #1728   | 128/<br>120      | SUI as diagnosed by clinical evaluation and urodynamics; age >30 year; previously failed pelvic floor muscle training                                                                                                                                                                                                                                                           | 60.4/<br>56.9                | 0             | 13                  |
| Guerrero<br>2010 <sup>57</sup>    | #2702   | 72/<br>50/<br>79 | The women needed to be over 18 years of age with clinically and urodynamically diagnosed SUI.                                                                                                                                                                                                                                                                                   | 54.3/52.4<br>/52.1           | 0             | 13                  |
| Harms<br>2007 <sup>64</sup>       | #3914   | 191              | All women suffered from objectively verified stress urinary incontinence.                                                                                                                                                                                                                                                                                                       | 59 (Med)                     | 0             | 13                  |
| Barry 2008 <sup>63</sup>          | #3620   | 107/<br>80       | Failed conservative management for symptomatic stress incontinence or required prophylactic incontinence surgery during prolapse repair for occult stress incontinence (no pre-operative subjective complaint of urinary stress leakage but found to have USI).                                                                                                                 | 53.6/54.2                    | 0             | 13                  |
| Sjostrom                          | #15548  | 155              | Women; 18–70 years; SUI ≥ one time/week; Ability to read and write Swedish; Access to                                                                                                                                                                                                                                                                                           | 47.9/49.4                    | 0             | 13                  |

| Study name                                       | Endnote | N          | Inclusion criteria                                                                                                                                                                                                                                                                                                            | Mean/<br>Median<br>age (yrs) | % of<br>males | RoB<br>No.<br>Low * |
|--------------------------------------------------|---------|------------|-------------------------------------------------------------------------------------------------------------------------------------------------------------------------------------------------------------------------------------------------------------------------------------------------------------------------------|------------------------------|---------------|---------------------|
| 2015 <sup>73</sup>                               |         |            | computer with Internet connection.                                                                                                                                                                                                                                                                                            |                              |               |                     |
| NN.<br>NCT0127228<br>4 2011 <sup>74</sup>        | # 14621 | 112        | Female at least 18 years of age; able and willing to complete all procedures and follow-up visits indicated in the protocol; confirmed SUI through cough stress test or urodynamics; failed two non-invasive incontinence therapies (such as Kegel exercise, behaviour modification, pad use, biofeedback, etc) for >6 month. | 54.5                         | 0             | 13                  |
| Lee 2013 <sup>75</sup>                           | #1656   | 56         | Women with symptoms of SUI and more than 2 g of urine leakage on a standard pad test with a full bladder                                                                                                                                                                                                                      | 52.2                         | 0             | 13                  |
| Duckett<br>2006 <sup>98</sup>                    | #4217   | 51         | Women, who had symptoms of both stress and urge incontinence and were proven to have idiopathic DO and USI on urodynamics, undergo regular review.                                                                                                                                                                            | 52 (Med)                     | 0             | 13                  |
| Ward 2008 <sup>63</sup>                          | #3630   | 344        | Women with urodynamic stress incontinence and who had failed to respond to pelvic floor muscle exercise.                                                                                                                                                                                                                      | NR                           | 0             | 12                  |
| Freeman<br>2011 <sup>72</sup>                    | #2539   | 93/<br>100 | Women over 21 years of age with USI, or mixed urinary incontinence where SUI was the predominant symptom, failed PFMT, and willing and able to complete a 4-day urinary diary.                                                                                                                                                | 50/54<br>(Med)               | 0             | 12                  |
| Schweitzer<br>2015 <sup>47</sup>                 | #1199   | 156        | Women; aged between 35 and 80 years; who had moderate to severe SUI, defined as a Sandvik score 3 or greater, and who had not experienced relief after pelvic floor muscle physiotherapy treatment.                                                                                                                           | 49.6                         | NR            | 12                  |
| Liebergall-<br>Wischnitzer<br>2013 <sup>61</sup> | #3257   | 64/<br>79  | Women aged 20–65 with a history compatible with SUI and at least 1 g urinary leakage in a 1-hour clinic-based pad test and with the ability to understand instructions in Hebrew or English.                                                                                                                                  | 48.5/47.8                    | 0             | 12                  |
| Cornu 2012 <sup>54</sup>                         | #1969   | 95         | Presence of SUI at clinical examination; clinical hypermobility of the bladder neck; previous failed conservative therapy for SUI (pelvic floor muscle training).                                                                                                                                                             | 56                           | 0             | 12                  |
| Kondo 2007 <sup>82</sup>                         | #3822   | 79         | In the present investigation a long-term assessment was performed through a questionnaire that was dispatched to 112 women who had been evaluated at the second, medium-term assessment.                                                                                                                                      | 53.2                         | 0             | 12                  |
| Neuman<br>2011 <sup>55</sup>                     | #2258   | 80/<br>82  | Diagnosis of SUI based on the patient's personal history and a positive cough test with the bladder holding 300 to 400 mL.                                                                                                                                                                                                    | 54/53                        | 0             | 11                  |
| Viktrup<br>2007 <sup>76</sup>                    | #10965  | 958        | Women 18 years of age and older were enrolled in the studies, but the phase 2 study had an upper age limit of 65 years of age. To be enrolled, patients must have reported a predominant symptom of SUI with a weekly IEF of 4 in the phase 2 study and of 7 or greater in the phase 3                                        | NR                           | 0             | 10                  |

| Study name                           | Endnote | N   | Inclusion criteria                                                                                                                                                                                                                                                                                                                     | Mean/<br>Median<br>age (yrs) | % of<br>males | RoB<br>No.<br>Low * |
|--------------------------------------|---------|-----|----------------------------------------------------------------------------------------------------------------------------------------------------------------------------------------------------------------------------------------------------------------------------------------------------------------------------------------|------------------------------|---------------|---------------------|
|                                      |         |     | studies.                                                                                                                                                                                                                                                                                                                               |                              |               |                     |
| North 2010 <sup>60</sup>             | #2955   | 60  | Female patient aged 18 years or over; Urodynamic stress incontinence on multichannel urodynamic; No desire for future pregnancy; Able and willing to give informed consent; All women had found initial treatment with pelvic floor muscle training ineffective and were considering surgical treatment with TVT                       | 50 (Med)                     | 0             | 10                  |
| Abdel-fattah 2012 <sup>53</sup>      | #1904   | 341 | Women with urodynamic SUI who had previously failed or declined pelvic floor muscle treatment. Women with urodynamic mixed UI, however, with a predominant SUI complaint, were included.                                                                                                                                               | NR                           | 0             | 9                   |
| <b>MEN</b>                           |         |     |                                                                                                                                                                                                                                                                                                                                        |                              |               |                     |
| Lanoe 2009 <sup>77</sup>             | #10419  | 84  | Men treated with the InVance sub-urethral sling                                                                                                                                                                                                                                                                                        | 68                           | 84%           | 16                  |
| Serra 2013 <sup>67</sup>             | #9689   | 61  | SUI; unsuccessful treatment with pelvic floor rehabilitation and pharmacologic therapy (duloxetine); undergone radical prostatectomy (established stress urinary incontinence) >1 year previously                                                                                                                                      | 65 (Med)                     | 100%          | 16                  |
| Zuckerman 2014 <sup>48</sup>         | #1334   | 102 | Preoperative patient evaluation was consistent with what we have previously reported, including documented stress urinary incontinence (SUI), a bladder with adequate capacity and compliance on urodynamic testing, and adequate sphincter contraction visualized cystoscopically.                                                    | 66.1                         | 100%          | 15                  |
| Filocamo 2007 <sup>81</sup>          | #11513  | 102 | Predominant symptoms of postprostatectomy SUI; at least four stress incontinent episodes daily; a positive 1-h pad test                                                                                                                                                                                                                | 64.6/ 65.7                   | 100%          | 14                  |
| Marchiori 2010 <sup>89</sup>         | #11411  | 332 | Patients after radical prostatectomy; Moderate to severe incontinence at 30 days after catheter removal                                                                                                                                                                                                                                | 67/66.5                      | 100%          | 13                  |
| Bochove-Overgaauw 2011 <sup>56</sup> | #2490   | 100 | SUI as a result of open or laparoscopic radical prostatectomy, transurethral resection of the prostate or external radiotherapy for prostate cancer. For patients to be eligible for inclusion in this study SUI had to persist after more than 6 months of pelvic floor muscle training.                                              | 66                           | 100%          | 13                  |
| Rehder 2012 <sup>79</sup>            | #2053   | 156 | SUI following RP, transurethral resection of the prostate (TURP), or open adenectomy; who were stress incontinent for >1 yr after surgery; all patients had undergone failed conservative treatment (all patients had PFMT, and some in addition electrical stimulation therapy); and required more than one incontinence pad per day. | 68 (Med)                     | 100%          | 12                  |
| Bauer 2009 <sup>80</sup>             | #2979   | 124 | Men with mild to severe SUI after RP were included in this study.                                                                                                                                                                                                                                                                      | 68.9                         | 100%          | 12                  |

\*) Number of low risk items in the Risk of Bias assessment (out of 20 items in total – See Table 5)

Table S4: Treatment characteristics in studies for female and male patients with SUI

| Study name         | Endnote | Treatment | Further details of intervention                                                                                                                                                                                                                                                                  | Duration of treatment |
|--------------------|---------|-----------|--------------------------------------------------------------------------------------------------------------------------------------------------------------------------------------------------------------------------------------------------------------------------------------------------|-----------------------|
| <b>WOMEN</b>       |         |           |                                                                                                                                                                                                                                                                                                  |                       |
| <b>Women-Tapes</b> |         |           |                                                                                                                                                                                                                                                                                                  |                       |
| Guerrero 2010      | #2702   | TVT       | The TVT-TM (Gynecare) tapes were inserted using the standard technique described by Ulmsten.                                                                                                                                                                                                     | Surgery (35min)       |
| Krofta 2010b       | #2953   | TVT       | TVT technique described by Ulmsten et al. Specifically, the procedure was performed under local anaesthesia supplemented by intravenous analgosedation. Cystoscopy was routinely performed, and a cough test was performed with the patient coughing repeatedly with a bladder volume of 300 mL. | Surgery (33min)       |
| Barry 2008         | #3620   | TVT       | The TVT procedures were performed as described by Ulmsten except that the choice of anaesthesia was left to the surgeon.                                                                                                                                                                         | Surgery (19min)       |
| Harms 2007         | #3914   | TVT       | TVT insertion (Gynecare TVT device; Gynecare, Ethicon, Norderstedt, Germany) under local anaesthesia, according to Ulmsten and Petros.                                                                                                                                                           | Surgery (NR)          |
| Duckett 2006       | #4217   | TVT       | The TVT procedure was performed as described by Ulmsten et al. and spinal anaesthesia was used.                                                                                                                                                                                                  | Surgery (NR)          |
| Ward 2008          | #3630   | TVT       | NR                                                                                                                                                                                                                                                                                               | Surgery (NR)          |
| Mostafa 2013       | #1538   | TVT-O     | SMUS-tension-free vaginal tape-obturator (TVT-O)                                                                                                                                                                                                                                                 | Surgery (35 min)      |
| Abdel-fattah 2012  | #1904   | TVT-O     | Performed using TVT-O (Ethicon Inc., Somerville, NJ, USA) for the inside-out                                                                                                                                                                                                                     | NR                    |
| Serati 2013        | #1571   | TVT-O     | Tension Free Vaginal Tape (Obturator) (TVT-O) procedure (Gynecare; Ethicon Inc., Somerville, NJ, USA). All of the TVT-O procedures were performed by two experienced surgeons                                                                                                                    | NR                    |
| Tommaselli 2013    | #1728   | TVT-O     | No further info                                                                                                                                                                                                                                                                                  | Single procedure      |
| Masata 2012        | #9798   | TVT-O     | (Ethicon Women's Health, Somerville, NJ, USA); according to original technique                                                                                                                                                                                                                   | Single procedure      |
| Groutz 2011        | #13090  | TVT-O     | GYNECARE TVT Obturator System, Somerville, NJ;                                                                                                                                                                                                                                                   | Single procedure      |

| Study name        | Endnote | Treatment                                       | Further details of intervention                                                                                                                                                                                                                                                                                                                                                                                                                                                  | Duration of treatment |
|-------------------|---------|-------------------------------------------------|----------------------------------------------------------------------------------------------------------------------------------------------------------------------------------------------------------------------------------------------------------------------------------------------------------------------------------------------------------------------------------------------------------------------------------------------------------------------------------|-----------------------|
| Tommaselli 2013   | #1710   | TVT-O                                           | Established midurethral sling procedure using the TVT-O device (Ethicon Gynecare, Somerville, NJ, USA) originally described by de Leval.                                                                                                                                                                                                                                                                                                                                         | Surgery (8min)        |
| Neuman 2011       | #2258   | Tension-free vaginal tape-obturator (TVT-O)     | The TVT surgical needle was inserted using the technique described by de-Leval for TVT-O, with the hammock method.                                                                                                                                                                                                                                                                                                                                                               | Surgery (17min)       |
| Houwert 2010      | #2950   | TOT TVT-O                                       | TVT-O (Gynecare), an “insideout” procedure, was performed as described by de Leval.                                                                                                                                                                                                                                                                                                                                                                                              | Surgery (16min)       |
| Krofta 2010       | #2953   | TVT-O                                           | The TVT-O procedure was performed according to the original technique described by de Leval. For the current study, the procedure was performed under spinal or local anaesthesia supplemented by intravenous analgesedation. Hydrodissection was performed routinely only in case of local anaesthesia.                                                                                                                                                                         | Surgery (24min)       |
| Tommaselli 2013   | #1710   | Modified TVT-O                                  | Same surgical procedure using the modified less invasive technique with the same device                                                                                                                                                                                                                                                                                                                                                                                          | Surgery (7min)        |
| Abdel-fattah 2012 | #1904   | TOT-Aris                                        | Performed using TOT-Aris (Coloplast Corp., Minneapolis, MN, USA) for the outside-in approach                                                                                                                                                                                                                                                                                                                                                                                     | NR                    |
| Freeman 2011      | #2539   | Monarc TOT                                      | Surgery was performed using standard techniques for both procedures, as agreed by all investigators. Patients had a choice of local, regional or general anaesthetic. Antibiotic and venous thromboembolism prophylaxes were provided in all cases.                                                                                                                                                                                                                              | Surgery (28min)       |
| Houwert 2010      | #2950   | TOT MONARC                                      | The Monarc tape was inserted through the “outside-in” route, using the technique recommended by the manufacturer.                                                                                                                                                                                                                                                                                                                                                                | Surgery (16min)       |
| Barry 2008        | #3620   | Monarc TOT                                      | The Monarc slings were performed as described in a previous publication, but to standardise sling tension, surgeons were requested to perform either a cough test or simulated cough (Crede manoeuvre) with 300 ml of water in bladder intra-operatively for both procedures. Catheters were not routinely placed post-operatively in patients undergoing sling surgery alone, unless intra-operative bladder injury occurred, whereby catheter would then be left in overnight. | Surgery (15min)       |
| Schweitzer 2015   | #1199   | transobturator sling                            | No further details on the intervention                                                                                                                                                                                                                                                                                                                                                                                                                                           | NR                    |
| Lee 2015          | #5274   | transobturator midurethral sling +/- POP repair | Monarc (American Medical Systems, Minnetonka, MN)                                                                                                                                                                                                                                                                                                                                                                                                                                | Single procedure      |



| Study name         | Endnote | Treatment                                             | Further details of intervention                                                                                                                                                                                                                                                                                                                                                                                                                                                                  | Duration of treatment |
|--------------------|---------|-------------------------------------------------------|--------------------------------------------------------------------------------------------------------------------------------------------------------------------------------------------------------------------------------------------------------------------------------------------------------------------------------------------------------------------------------------------------------------------------------------------------------------------------------------------------|-----------------------|
| Van Leijsen 2013   | #9658   | Surgery                                               | midurethral sling                                                                                                                                                                                                                                                                                                                                                                                                                                                                                | Single procedure      |
| Van Leijsen 2013   | #9658   | Individually tailored treatment                       | midurethral sling, anticholinergics for detrusor overactivity, prolonged pelvic floor exercises or bladder training for dysfunctional voiding, a pessary, expectant management, intravesical botulinum toxin injections, pretibial nerve stimulation                                                                                                                                                                                                                                             | various               |
| Van Leijsen 2013   | #9658   | Individual treatment according to urodynamic findings | midurethral sling, anticholinergics for detrusor overactivity, prolonged pelvic floor exercises or bladder training for dysfunctional voiding, a pessary, expectant management, intravesical botulinum toxin injections, pretibial nerve stimulation                                                                                                                                                                                                                                             | various               |
| North 2010         | #2955   | Single incision sling procedure (Minitape-TM)         | Mid-urethral tape sling which is inserted through a single vaginal incision with no abdominal or groin exit incisions. The tape is a monocomponent, polypropylene mesh, which is 200 lm thick and 14 cm long. The needle introducer is approximately half the diameter of the TVT needle introducer (2.5 mm in diameter). A terminal anchor on each end of the tape fixes it in the retropubic space.                                                                                            | Surgery (24min)       |
| Primus 2006        | #4000   | SPARC sling system                                    | The SPARC Female Sling System is a minimally invasive procedure designed to correct stress urinary incontinence in women. This system uses a suprapubic surgical approach to position the sling under the midurethra, employing two thin, curved stainless steel needles advanced via two small incisions above the pubic bone to a vaginal incision below the urethra. Only one cystoscopy is required, after both needles are positioned, to confirm the integrity of the urethra and bladder. | Surgery (42min)       |
| Palomba 2014       | #4757   | Retropubic TVT                                        | SPARC system (Tegea for AMS)                                                                                                                                                                                                                                                                                                                                                                                                                                                                     | Single procedure      |
| Freeman 2011       | #2539   | Retropubic TVT                                        | Surgery was performed using standard techniques for both procedures, as agreed by all investigators. Patients had a choice of local, regional or general anaesthetic. Antibiotic and venous thromboembolism prophylaxes were provided in all cases.                                                                                                                                                                                                                                              | Surgery (30min)       |
| Houwert 2010       | #2950   | Retropubic TVT                                        | The TVT (Gynecare, Ethicon Inc, Sommerville, NJ) procedure was performed as described by Ulmsten et al.                                                                                                                                                                                                                                                                                                                                                                                          | Surgery (NR)          |
| <b>Women-Sling</b> |         |                                                       |                                                                                                                                                                                                                                                                                                                                                                                                                                                                                                  |                       |
| Mostafa 2013       | #1538   | SIMS                                                  | adjustable anchored single incision mini-sling (SIMS-Ajust - C. R. Bard, Inc.)                                                                                                                                                                                                                                                                                                                                                                                                                   | Surgery (35 min)      |
| Schweitzer 2015    | #1199   | adjustable single-incision sling                      | No further details on the intervention                                                                                                                                                                                                                                                                                                                                                                                                                                                           | NR                    |

| Study name                     | Endnote | Treatment                                               | Further details of intervention                                                                                                                                                                                                                                                                                                                                                                                                     | Duration of treatment |
|--------------------------------|---------|---------------------------------------------------------|-------------------------------------------------------------------------------------------------------------------------------------------------------------------------------------------------------------------------------------------------------------------------------------------------------------------------------------------------------------------------------------------------------------------------------------|-----------------------|
| NCT01272284 2011               | # 14621 | Altis® Single Incision Sling                            | Coloplast Altis single incision sling system                                                                                                                                                                                                                                                                                                                                                                                        | NR                    |
| Natale 2014                    | #4664   | Single-Incision-Sling                                   | Single Incision Sling (Ajust™ C.R. Bard Inc., New Providence, NJ, USA); surgical technique described on p. 49                                                                                                                                                                                                                                                                                                                       | Single procedure      |
| Palomba 2014                   | #4757   | single-incision mini-slings                             | Ajust (Bard SpA, Rome, Italy), MiniArc (Tegea for AMS, Bologna, Italy), or TVT Secur System (Johnson & Johnson, Rome, Italy)                                                                                                                                                                                                                                                                                                        | Single procedure      |
| Dias 2014                      | #4991   | single-incision sling (SIS)                             | Altis® (Coloplast); full description of surgical technique at p.1091                                                                                                                                                                                                                                                                                                                                                                | Single procedure      |
| Lee 2015                       | #5274   | single incision sling +/-POP repair                     | MiniArc (American Medical Systems, Minnetonka, MN)                                                                                                                                                                                                                                                                                                                                                                                  | Single procedure      |
| Cornu 2012                     | #1969   | Ajust-TM single incision transobturator sling procedure | All patients were implanted with the Ajust™ adjustable single incision sling (Bard Urological Division, Covington, GA, USA). All procedures were performed or supervised by one experienced surgeon. No associated procedures were performed, except for 1 patient presenting SUI associated with dysuria owing to previous transobturator sling misplacement. No prolapse surgery was conducted at the time of sling implantation. | Surgery (15min)       |
| Guerrero 2010                  | #2702   | Autologous fascial sling                                | The 'sling-on-a-string' technique as this had been shown to be equivalent to the standard longer sling with lower morbidity.                                                                                                                                                                                                                                                                                                        | Surgery (54min)       |
| <b>Women-Colposuspension</b>   |         |                                                         |                                                                                                                                                                                                                                                                                                                                                                                                                                     |                       |
| Carey 2006                     | #11686  | Burch Colposuspension                                   | Open, description of surgical procedure                                                                                                                                                                                                                                                                                                                                                                                             | Single procedure      |
| Carey 2006                     | #11686  | Burch Colposuspension                                   | Laparoscopic, description of surgical procedure                                                                                                                                                                                                                                                                                                                                                                                     | Single procedure      |
| Ward 2008                      | #3630   | Burch Colposuspension                                   | NR                                                                                                                                                                                                                                                                                                                                                                                                                                  | Surgery (NR)          |
| <b>Women-PFMT (Supervised)</b> |         |                                                         |                                                                                                                                                                                                                                                                                                                                                                                                                                     |                       |
| Labrie 2013                    | #13133  | Physiotherapy                                           | PFMT according to the Dutch guidelines; A supervised program to build up to 8 to 12 maximal contractions three times per day; 1-2 wk interval, 9 sessions in 9-18 wks; biofeedback, electrostimulation                                                                                                                                                                                                                              | up to 4.2 mo          |

| Study name                       | Endnote | Treatment                                                                    | Further details of intervention                                                                                                                                                                                                                                                                                                                                                                                                                                                           | Duration of treatment             |
|----------------------------------|---------|------------------------------------------------------------------------------|-------------------------------------------------------------------------------------------------------------------------------------------------------------------------------------------------------------------------------------------------------------------------------------------------------------------------------------------------------------------------------------------------------------------------------------------------------------------------------------------|-----------------------------------|
| Liebergall-Wischnitzer 2013      | #3257   | Pelvic floor muscle training (PFMT)                                          | Pelvic floor muscle training exercises the pelvic floor muscles, including levator ani, which acts as the main support for the bladder neck during periods of increased intra-abdominal pressure. The aim of PFMT is to both strengthen and improve the timing of pelvic floor muscle contractions.                                                                                                                                                                                       | 12 wks (30 min, 6 sessions)       |
| Kondo 2007                       | #3822   | Pelvic floor muscle training (PFMT)                                          | Essentially, the training comprised repeated muscle contractions of the pelvic floor and the rapid locking of the perineum just before the abdominal strain. In the training session experienced nurses and doctors supervised the exercises, and they taught how continence was maintained or lost and the treatment rationale was also explained. At home women were instructed to practice the exercise 30 times a day.                                                                | 8 weeks (60–90 min once a week)   |
| Williams 2006                    | #4019   | Intensive PFMT                                                               | Training in PFMT was provided by specially trained nurses, after an initial digital assessment and perineometry. Women were taught how to do correct PF contractions and an individualized exercise regimen was given.                                                                                                                                                                                                                                                                    | 3m                                |
| Lee 2013                         | #1656   | Extracorporeal biofeedback combined with pelvic floor muscle training (PFMT) | All participants visited the same physiotherapist twice a week for the first 4 weeks and then once a week for the next 8 weeks. The Hue & Joy extracorporeal biofeedback device (HnJ-5000; Furon Medical, Korea) was used in the study at an outpatient clinic. The Hue & Joy extracorporeal biofeedback device (HnJ-5000; Furon Medical, Korea) was used in the study at an outpatient clinic. Participants were advised to perform 30 sessions of PFMT (100 contractions) at home daily | 12 wks                            |
| Liebergall-Wischnitzer 2013      | #3257   | Paula method (circular muscle strengthening)                                 | The Paula method is a circular muscle exercise protocol that works on the premise that all sphincters in the body are synchronized, so that movement of one sphincter affects distant circular muscles.                                                                                                                                                                                                                                                                                   | 12 wks (12 45min weekly sessions) |
| <b>Women-PFMT (Unsupervised)</b> |         |                                                                              |                                                                                                                                                                                                                                                                                                                                                                                                                                                                                           |                                   |
| Sjostrom 2015                    | #15548  | Internet based PFMT                                                          | PFMT $\geq$ 8 contractions three times per day; information on SUI, lifestyle advice and training reports. Asynchronous, individually tailored e-mail support from urotherapist during the treatment period. 8 escalating levels, and also included cognitive behavioural therapy assignments for lifestyle changes (if applicable) and for the identification and changes in behaviours of avoidance and/or redundant security measures (if applicable).                                 | 3m                                |
| Sjostrom 2015                    | #15548  | Postal based PFMT                                                            | PFMT $\geq$ 8 contractions three times per day; information on SUI, lifestyle advice and training reports. Participants trained on their own.                                                                                                                                                                                                                                                                                                                                             | 3m                                |

| Study name                                   | Endnote | Treatment                                | Further details of intervention                                                                                                                                                                                                                                                                                                                                                                                                                                                         | Duration of treatment |
|----------------------------------------------|---------|------------------------------------------|-----------------------------------------------------------------------------------------------------------------------------------------------------------------------------------------------------------------------------------------------------------------------------------------------------------------------------------------------------------------------------------------------------------------------------------------------------------------------------------------|-----------------------|
| <b>Women-Vaginal cone therapy</b>            |         |                                          |                                                                                                                                                                                                                                                                                                                                                                                                                                                                                         |                       |
| Williams 2006                                | #4019   | Vaginal cone therapy                     | At the first clinical visit after randomization women were instructed how to insert the cones, supervised by the nurse; during this consultation the appropriate weight of cone for starting treatment was identified (Femina, Urohealth Systems Inc., Newport Beach, CA, USA).                                                                                                                                                                                                         | 3m                    |
| <b>Women-Lifestyle Advice (Unsupervised)</b> |         |                                          |                                                                                                                                                                                                                                                                                                                                                                                                                                                                                         |                       |
| Williams 2006                                | #4019   | Continued primary behaviour intervention | Advice on fluid intake, caffeine intake, bladder re-education, PF awareness (PFA) and weight loss. This was continuation of an 8-week period for all three arms.                                                                                                                                                                                                                                                                                                                        | 3m                    |
| <b>Women-Bulking agents</b>                  |         |                                          |                                                                                                                                                                                                                                                                                                                                                                                                                                                                                         |                       |
| Ghoniem 2009                                 | #3326   | Bulking agent                            | Macroplastique                                                                                                                                                                                                                                                                                                                                                                                                                                                                          | Once or twice         |
| Ghoniem 2009                                 | #3326   | Bulking agent                            | Contigen                                                                                                                                                                                                                                                                                                                                                                                                                                                                                | Once or twice         |
| <b>Women- Duloxetine</b>                     |         |                                          |                                                                                                                                                                                                                                                                                                                                                                                                                                                                                         |                       |
| Viktrup 2007                                 | #10965  | Duloxetine                               | 40mg bid                                                                                                                                                                                                                                                                                                                                                                                                                                                                                | 12 wks                |
| Schagen van Leeuwen 2008                     | #11523  | Duloxetine                               | Oral 20mg bid for 2 weeks and 40mg bid for 10 weeks                                                                                                                                                                                                                                                                                                                                                                                                                                     | 12 wks                |
| <b>MEN</b>                                   |         |                                          |                                                                                                                                                                                                                                                                                                                                                                                                                                                                                         |                       |
| <b>Male Sling</b>                            |         |                                          |                                                                                                                                                                                                                                                                                                                                                                                                                                                                                         |                       |
| Zuckerman 2014                               | #1334   | AdVance transobturator male slings       | The sling was fixed to the corpus spongiosum in each of the 4 corners, with the proximal aspect of the sling fixed to the previous site of attachment of the central tendon.                                                                                                                                                                                                                                                                                                            | NR                    |
| Serra 2013                                   | #9689   | male sling                               | AdVance/AdVance XP                                                                                                                                                                                                                                                                                                                                                                                                                                                                      | Single procedure      |
| Bauer 2009                                   | #2979   | AdVance Sling                            | The AdVance sling is a polypropylene monofilament mesh that is selfanchoring due to its woven nature. It is implanted using a transobturator approach via a median perineal incision utilizing a trocar system. The procedure is performed as previously described with some minor changes. The middle part of the sling is fixed with long-term resorbable suture distally on the bulbus such that the bulbus appendix can rotate retrourethally and cranially to avoid hypermobility. | Surgery (NR)          |

| Study name                                | Endnote | Treatment                                                            | Further details of intervention                                                                                                                                                                                                                                                                                                                                                                                            | Duration of treatment |
|-------------------------------------------|---------|----------------------------------------------------------------------|----------------------------------------------------------------------------------------------------------------------------------------------------------------------------------------------------------------------------------------------------------------------------------------------------------------------------------------------------------------------------------------------------------------------------|-----------------------|
| Rehder 2012                               | #2053   | Transobturator Retroluminal Repositioning Sling Suspension (AdVance) | All patients underwent implantation of the AdVance male sling under general or locoregional anaesthesia. The transobturator sling was implanted using an operative technique previously described.                                                                                                                                                                                                                         | Surgery (NR)          |
| Bochove-Overgaauw 2011                    | #2490   | Argus Sling                                                          | The operation was performed as described by Romano et al with some minor modifications                                                                                                                                                                                                                                                                                                                                     | Surgery (NR)          |
| Lanoe 2009                                | #10419  | InVance sub-urethral sling                                           | Bone anchored sub- urethral sling was implanted surgically. They were hospitalised for average 3 days.                                                                                                                                                                                                                                                                                                                     | Surgery (69 mins)     |
| <b>Men-PFMT (Supervised)</b>              |         |                                                                      |                                                                                                                                                                                                                                                                                                                                                                                                                            |                       |
| Filocamo 2007                             | #11513  | PFMT                                                                 | Verbal instructions and manual feedback about pelvic floor muscle contraction, written instructions to perform three sets of 10 contractions lasting 5 s with 10 s of muscular relaxation daily; visits every 15 days                                                                                                                                                                                                      | 3.7m                  |
| Marchiori 2010                            | #11411  | PFMT guided+ biofeedback+ electrical stimulation                     | Instruction how to correctly continue Kegel exercises at home and intensive guided rehabilitation program - supervised and guided rehabilitation with biofeedback and electrical stimulation: 1 st session instructions an biofeedback, 2nd - 10 sets of pelvic floor electrical stimulation (PFES) lasting 15 minutes each; rehabilitation program daily for BF and instructions and a mean period of 2-3 weeks for PFES. | 12m                   |
| <b>Men- PFMT (Unsupervised)</b>           |         |                                                                      |                                                                                                                                                                                                                                                                                                                                                                                                                            |                       |
| Marchiori 2010                            | #11411  | PFMT                                                                 | Kegel exercises at home by themselves after having received oral and written information from a urologist and a urodynamic advisor                                                                                                                                                                                                                                                                                         | 12m                   |
| <b>Men-PFMT (Supervised) + duloxetine</b> |         |                                                                      |                                                                                                                                                                                                                                                                                                                                                                                                                            |                       |
| Filocamo 2007                             | #11513  | PFMT+duloxetine                                                      | Verbal instructions and manual feedback about pelvic floor muscle contraction, written instructions to perform three sets of 10 contractions lasting 5 s with 10 s of muscular relaxation daily; visits every 15 days; duloxetine 40 mg twice daily                                                                                                                                                                        | 3.7m                  |

Table S5: Results of interventions for patients with SUI

| Study name       | Endnote | Intervention | N   | Follow-up period | Type of outcome        | Outcome description                                                                                                                                                 | With or without containment products | % of patients with outcome |
|------------------|---------|--------------|-----|------------------|------------------------|---------------------------------------------------------------------------------------------------------------------------------------------------------------------|--------------------------------------|----------------------------|
| <b>Women</b>     |         |              |     |                  |                        |                                                                                                                                                                     |                                      |                            |
| <b>Women-TVT</b> |         |              |     |                  |                        |                                                                                                                                                                     |                                      |                            |
| Guerrero 2010    | #2702   | TVT          | 72  | 6m               | Cure                   | Completely dry                                                                                                                                                      | NR                                   | 50%                        |
| Guerrero 2010    | #2702   | TVT          | 72  | 12m              | Cure                   | Completely dry                                                                                                                                                      | NR                                   | 53%                        |
| Guerrero 2010    | #2702   | TVT          | 72  | 6m               | Improvement            | Either completely dry or who reported that their urinary incontinence was improved at 6 weeks                                                                       | NR                                   | 90%                        |
| Guerrero 2010    | #2702   | TVT          | 72  | 12m              | Improvement            | Either completely dry or who reported that their urinary incontinence was improved at 6 weeks                                                                       | NR                                   | 89%                        |
| Krofta 2010b     | #2953   | TVT          | 141 | 12m              | Objective cure         | A negative cough stress test with 300 mL of saline solution in the bladder during a multichannel urodynamic examination and a 1-h pad test weight of less than 1 g. | With                                 | 90.1%                      |
| Krofta 2010b     | #2953   | TVT          | 141 | 12m              | Objective improvement  | A negative cough stress test and a 1-h pad test weight of less than 5 g.                                                                                            | With                                 | 8.5%                       |
| Krofta 2010b     | #2953   | TVT          | 141 | 12m              | Subjective cure        | No leakage of urine after surgery (tick-box "never" was checked after surgery) in the ICIQ-UI SF questionnaire (scored item 1: assessment of frequency /0–5/).      | Without                              | 78.7%                      |
| Krofta 2010b     | #2953   | TVT          | 141 | 12m              | Subjective improvement | If assessment of frequency of urine leakage after the surgery was lower than before in the ICIQ-UI SF questionnaire (scored item 1: assessment of frequency /0–5/). | Without                              | 19.1%                      |
| Barry 2008       | #3620   | TVT          | 82  | 3m               | Objective Cure         | NR                                                                                                                                                                  | NR                                   | 78%                        |
| Barry 2008       | #3620   | TVT          | 82  | 3m               | Subjective Cure        | NR                                                                                                                                                                  | NR                                   | 86.6%                      |
| Harms 2007       | #3914   | TVT          | 171 | 36m              | Cure (objective and    | Dry, symptom-free patient without objective urine loss during vigorous coughing and other                                                                           | NR                                   | 89.5%                      |

| Study name        | Endnote | Intervention | N   | Follow-up period | Type of outcome | Outcome description                                                                                                                                                                                                                                                                                                                                                                                                                                                                                    | With or without containment products | % of patients with outcome |
|-------------------|---------|--------------|-----|------------------|-----------------|--------------------------------------------------------------------------------------------------------------------------------------------------------------------------------------------------------------------------------------------------------------------------------------------------------------------------------------------------------------------------------------------------------------------------------------------------------------------------------------------------------|--------------------------------------|----------------------------|
|                   |         |              |     |                  | subjective)     | provocative activities at a standard bladder filling of 300 ml and a demonstrable positive urethral closure pressure during stress provocation in the absence of detrusor instability. Additional criteria were no episodes of stress or urge incontinence in the 24-h voiding diary and no postvoid residual urine. Finally, the definition of cure comprised assessment of subjective continence by means of a self-completed detailed urinary incontinence questionnaire and the patient's history. |                                      |                            |
| Duckett 2006      | #4217   | TVT          | 46  | 6m               | Objective cure  | Normal detrusor function during filling cystometry                                                                                                                                                                                                                                                                                                                                                                                                                                                     | NR                                   | 92%                        |
| Duckett 2006      | #4217   | TVT          | 46  | 6m               | Subjective cure | Information from interview and questionnaire                                                                                                                                                                                                                                                                                                                                                                                                                                                           | NR                                   | 91%                        |
| Ward 2008         | #3630   | TVT          | 72  | 5y               | Cure            | Negative 1-hour pad test (<1 g change in weight)                                                                                                                                                                                                                                                                                                                                                                                                                                                       | With                                 | 81%                        |
| Ward 2008         | #3630   | TVT          | 98  | 5y               | Subjective Cure | Positive response to BFLUTS questionnaire item 7                                                                                                                                                                                                                                                                                                                                                                                                                                                       | With                                 | 63%                        |
| Mostafa 2013      | #1538   | TVT-O        | 69  | 4 to 6m          | Success         | Patient reported success rate, defined as "very much improved" or "much improved" on the PGI-I                                                                                                                                                                                                                                                                                                                                                                                                         | NR                                   | 92%                        |
| Mostafa 2013      | #1538   | TVT-O        | 62  | 1yr              | Success         | Patient reported success rate, defined as "very much improved" or "much improved" on the PGI-I                                                                                                                                                                                                                                                                                                                                                                                                         | NR                                   | 53/62 (85.5%)              |
| Mostafa 2013      | #1538   | TVT-O        | 62  | 1yr              | Objectives cure | Negative Cough Stress Test (CST)                                                                                                                                                                                                                                                                                                                                                                                                                                                                       | NR                                   | 51/62 (82.3%)              |
| Mostafa 2013      | #1538   | TVT-O        | 57  | 1yr              | Improvement QoL | >= 18 points improvement in total King's Health Questionnaire (KHQ) score                                                                                                                                                                                                                                                                                                                                                                                                                              | NR                                   | 50/57 (87.7%)              |
| Abdel-fattah 2012 | #1904   | TVT-O        | 170 | 3 yr             | Success         | Based on Patient Global Impression of Improvement response                                                                                                                                                                                                                                                                                                                                                                                                                                             | NR                                   | 93/126 (73.8%)             |
| Abdel-fattah 2012 | #1904   | TVT-O        | 170 | 1 yr             | Success         | Based on Patient Global Impression of Improvement response                                                                                                                                                                                                                                                                                                                                                                                                                                             | NR                                   | 81.30%                     |

| Study name        | Endnote | Intervention | N   | Follow-up period | Type of outcome                    | Outcome description                                                                                                                                                                                        | With or without containment products | % of patients with outcome |
|-------------------|---------|--------------|-----|------------------|------------------------------------|------------------------------------------------------------------------------------------------------------------------------------------------------------------------------------------------------------|--------------------------------------|----------------------------|
| Abdel-fattah 2012 | #1904   | TVT-O        | 170 | 1 yr             | Improvement QoL                    | Based on 18-point improvement in KHQ scores as the cut-off value                                                                                                                                           | NR                                   | 79.40%                     |
| Serati 2013       | #1571   | TVT-O        | 181 | 12 m             | Global cure                        | Patients were defined as 'cured' if they presented a negative stress test, a score reduction of at least 80% on the UDI and a response of 'much better' or 'very much better' on the PGI-I.                | NR                                   | 165/181 (91.2%)            |
| Serati 2013       | #1571   | TVT-O        | 181 | 12 m             | Objective cure                     | Negative stress test. Defined as the absence of urine leakage during a cough test performed in the lithotomic and upright positions with a full bladder (ultrasonographic measurement of at least 400 mL). | NR                                   | 171/181 (94.1%)            |
| Serati 2013       | #1571   | TVT-O        | 181 | 12 m             | Subjective cure                    | International Consultation on Incontinence Questionnaire-short form (ICIQ-SF)                                                                                                                              | NR                                   | 0                          |
| Serati 2013       | #1571   | TVT-O        | 181 | 12 m             | Subjective cure                    | 'Very much better' or 'much better' on PGI-I,                                                                                                                                                              | NR                                   | 165/181 (91.1%)            |
| Serati 2013       | #1571   | TVT-O        | 181 | 12 m             | Subjective cure                    | 80% reduction in UDI score                                                                                                                                                                                 | NR                                   | 165/181 (91.1%)            |
| Tommaselli 2013   | #1728   | TVT-O        | 62  | 5y               | Subjective-PGI-I defined           | Much or very much improved                                                                                                                                                                                 | NR                                   | 79%                        |
| Tommaselli 2013   | #1728   | TVT-O        | 62  | 5y               | QoL-improvement in quality of life | >= 20 point increase on the total I-QOL score                                                                                                                                                              | NR                                   | 83.9%                      |
| Tommaselli 2013   | #1728   | TVT-O        | 66  | 3 yr             | Objective cure                     | Negative Cough Stress Test (CST)                                                                                                                                                                           | NR                                   | 86.4%                      |
| Masata 2012       | #9798   | TVT-O        | 68  | 2y               | Subjective cure                    | Likert scale cured                                                                                                                                                                                         | NR                                   | 89.7%                      |
| Masata 2012       | #9798   | TVT-O        | 68  | 2y               | Subjective improvement             | Likert scale improved                                                                                                                                                                                      | NR                                   | 7.4%                       |



| Study name      | Endnote | Intervention                                | N  | Follow-up period | Type of outcome                       | Outcome description                                                                                                                | With or without containment products | % of patients with outcome |
|-----------------|---------|---------------------------------------------|----|------------------|---------------------------------------|------------------------------------------------------------------------------------------------------------------------------------|--------------------------------------|----------------------------|
| Masata 2012     | #9798   | TVT-O                                       | 68 | 2y               | Subjective stress negative            | no stress leakage of urine after assessed by ICIQ-UI SH ("Never"/"Urine does not leak" for question 6: "When does urine leak?").   | NR                                   | 85.3%                      |
| Masata 2012     | #9798   | TVT-O                                       | 68 | 2y               | Subjective urgency incontinence cured | ICIQ-UISH response to "Leaks before you can get to the toilet."                                                                    | NR                                   | 14.7%                      |
| Masata 2012     | #9798   | TVT-O                                       | 68 | 2y               | Objective cure                        | Negative stress test                                                                                                               | NR                                   | 92.6%                      |
| Groutz 2011     | #13090  | TVT-O                                       | 61 | 5y               | Cure                                  | Negative stress test, no episodes of SUI, and positive (cure) global satisfaction                                                  | NR                                   | 74%                        |
| Groutz 2011     | #13090  | TVT-O                                       | 61 | 5y               | Improved                              | Infrequent episodes of SUI                                                                                                         | NR                                   | 8%                         |
| Tommaselli 2013 | #1710   | TVT-O                                       | 52 | 12m              | Objective cure                        | Absence of any leakage during the CST with a 250 ml bladder filling and the stress test during the filling phase of the cystometry | NR                                   | 92.30%                     |
| Neuman 2011     | #2258   | Tension-free vaginal tape-obturator (TVT-O) | 69 | 3y               | Cure                                  | There was no leakage at all                                                                                                        | NR                                   | 87%                        |
| Houwert 2010    | #2950   | TOT TVT-O                                   | 85 | 12m              | Cure                                  | Statement of the woman of not experiencing any loss of urine upon physical activity, coughing, or sneezing.                        | NR                                   | 76%                        |
| Houwert 2009    | #3050   | TOT TVT-O                                   | 75 | 12m              | Cure                                  | Statement of the woman of not experiencing any loss of urine upon physical exercise.                                               | NR                                   | 77%                        |
| Houwert 2009    | #3050   | TOT TVT-O                                   | 75 | 12m              | Improvement                           | NR                                                                                                                                 | NR                                   | 15%                        |
| Houwert 2009    | #3050   | TOT TVT-O                                   | 75 | 2-4y             | Cure                                  | Statement of the woman of not experiencing any loss of urine upon physical exercise.                                               | NR                                   | 72%                        |
| Houwert 2009    | #3050   | TOT TVT-O                                   | 75 | 2-4y             | Improvement                           | NR                                                                                                                                 | NR                                   | 12%                        |
| Houwert 2009    | #10629  | TOT TVT-O                                   | 85 | 14m              | Cure                                  | Statement of the woman of not experiencing any                                                                                     | NR                                   | 77%                        |

| Study name        | Endnote | Intervention   | N   | Follow-up period | Type of outcome        | Outcome description                                                                                                                                                 | With or without containment products | % of patients with outcome |
|-------------------|---------|----------------|-----|------------------|------------------------|---------------------------------------------------------------------------------------------------------------------------------------------------------------------|--------------------------------------|----------------------------|
|                   |         |                |     |                  |                        | loss of urine on physical exercise.                                                                                                                                 |                                      |                            |
| Krofta 2010b      | #2953   | TVT-O          | 147 | 12m              | Objective cure         | A negative cough stress test with 300 mL of saline solution in the bladder during a multichannel urodynamic examination and a 1-h pad test weight of less than 1 g. | With                                 | 88.4%                      |
| Krofta 2010b      | #2953   | TVT-O          | 147 | 12m              | Objective improvement  | A negative cough stress test and a 1-h pad test weight of less than 5 g.                                                                                            | With                                 | 9.5%                       |
| Krofta 2010b      | #2953   | TVT-O          | 147 | 12m              | Subjective cure        | No leakage of urine after surgery (tick-box “never” was checked after surgery) in the ICIQ-UI SF questionnaire (scored item 1: assessment of frequency /0–5/).      | Without                              | 76.2%                      |
| Krofta 2010b      | #2953   | TVT-O          | 147 | 12m              | Subjective improvement | If assessment of frequency of urine leakage after the surgery was lower than before in the ICIQ-UI SF questionnaire (scored item 1: assessment of frequency /0–5/). | Without                              | 21.1%                      |
| Tommaselli 2013   | #1710   | Modified TVT-O | 45  | 12m              | Objective cure         | Absence of any leakage during the CST with a 250 ml bladder filling and the stress test during the filling phase of the cystometry                                  | NR                                   | 88.80%                     |
| Abdel-fattah 2012 | #1904   | TOT-Aris       | 171 | 3 yr             | Success                | Based on Patient Global Impression of Improvement response                                                                                                          | NR                                   | 81/112 (72.3%)             |
| Abdel-fattah 2012 | #1904   | TOT-Aris       | 171 | 1 yr             | Success                | Same as above                                                                                                                                                       | NR                                   | 73.10%                     |
| Abdel-fattah 2012 | #1904   | TOT-Aris       | 171 | 1 yr             | Improvement QoL        | Based on 18-point improvement in KHQ scores as the cut-off value                                                                                                    | NR                                   | 69.60%                     |
| Freeman 2011      | #2539   | Monarc TOT     | 100 | 12m              | Cure                   | Absence of SUI                                                                                                                                                      | NR                                   | 63.4%                      |
| Houwert 2010      | #2950   | TOT MONARC     | 95  | 12m              | Cure                   | Statement of the woman of not experiencing any loss of urine upon physical activity, coughing, or sneezing.                                                         | NR                                   | 74%                        |

| Study name      | Endnote | Intervention                                    | N   | Follow-up period | Type of outcome | Outcome description                                                                                                                                                              | With or without containment products | % of patients with outcome |
|-----------------|---------|-------------------------------------------------|-----|------------------|-----------------|----------------------------------------------------------------------------------------------------------------------------------------------------------------------------------|--------------------------------------|----------------------------|
| Houwert 2009    | #3050   | TOT MONARC                                      | 86  | 12m              | Cure            | Statement of the woman of not experiencing any loss of urine upon physical exercise.                                                                                             | NR                                   | 77%                        |
| Houwert 2009    | #3050   | TOT MONARC                                      | 86  | 12m              | Improvement     | NR                                                                                                                                                                               | NR                                   | 17%                        |
| Houwert 2009    | #3050   | TOT MONARC                                      | 86  | 2-4y             | Cure            | Statement of the woman of not experiencing any loss of urine upon physical exercise.                                                                                             | NR                                   | 65%                        |
| Houwert 2009    | #3050   | TOT MONARC                                      | 86  | 2-4y             | Improvement     | NR                                                                                                                                                                               | NR                                   | 21%                        |
| Houwert 2009    | #10629  | TOT MONARC                                      | 95  | 14m              | Cure            | Statement of the woman of not experiencing any loss of urine on physical exercise.                                                                                               | NR                                   | 74%                        |
| Barry 2008      | #3620   | Monarc TOT                                      | 58  | 3m               | Objective Cure  | NR                                                                                                                                                                               | NR                                   | 82.8%                      |
| Barry 2008      | #3620   | Monarc TOT                                      | 58  | 3m               | Subjective Cure | NR                                                                                                                                                                               | NR                                   | 72.4%                      |
| Schweitzer 2016 | #1199   | TOT                                             | 44  | 12 m             | Objective cure  | Objective cure was defined as a negative stress cough test at a bladder volume of at least 300 mL                                                                                | NR                                   | 39/44 (88.6%)              |
| Schweitzer 2016 | #1199   | TOT                                             | 48  | 12 m             | Subjective cure | Subjective cure defined as a negative answer to the Urogenital Distress Inventory question "Do you experience urine leakage related to physical activity, coughing or sneezing?" | NR                                   | 35/48 (72.9%)              |
| Schweitzer 2016 | #1199   | TOT                                             | 44  | 12 m             | Improvement     | Much or very much improvement on the Patient Global Impression of Improvement scale                                                                                              | NR                                   | 40/44 (87%)                |
| Lee 2015        | #5274   | Transobturator midurethral sling +/- POP repair | 95  | 6 mo             | Objective cure  | Negative urodynamic stress or cough stress test                                                                                                                                  | NR                                   | 86.3%                      |
| Lee 2015        | #5274   | Transobturator midurethral sling +/- POP repair | 90  | 12 mo            | Objective cure  | Negative urodynamic stress or cough stress test                                                                                                                                  | NR                                   | 96.7%                      |
| Lee 2015        | #5274   | Transobturato                                   | 107 | 6 mo             | Subjective      | No recorded leakage with coughing and exercise                                                                                                                                   | NR                                   | 92.5%                      |

| Study name        | Endnote | Intervention                                    | N   | Follow-up period | Type of outcome         | Outcome description                                                                                                                                                 | With or without containment products | % of patients with outcome |
|-------------------|---------|-------------------------------------------------|-----|------------------|-------------------------|---------------------------------------------------------------------------------------------------------------------------------------------------------------------|--------------------------------------|----------------------------|
|                   |         | r midurethral sling +/- POP repair              |     |                  | cure                    | on questions 3 and 5 of the International Consultation on Incontinence Questionnaire-Urinary Incontinence Short Form                                                |                                      |                            |
| Lee 2015          | #5274   | Transobturator midurethral sling +/- POP repair | 103 | 12 mo            | Subjective cure         | Same as above                                                                                                                                                       | NR                                   | 94.2%                      |
| Lee 2015          | #5274   | Transobturator midurethral sling no POP repair  | 51  | 6 mo             | Objective cure          | Negative urodynamic stress or cough stress test                                                                                                                     | NR                                   | 84.3%                      |
| Lee 2015          | #5274   | Transobturator midurethral sling no POP repair  | 45  | 12 mo            | Objective cure          | Negative urodynamic stress or cough stress test                                                                                                                     | NR                                   | 93.3%                      |
| Lee 2015          | #5274   | Transobturator midurethral sling no POP repair  | 56  | 6 mo             | Subjective cure         | No recorded leakage with coughing and exercise on questions 3 and 5 of the International Consultation on Incontinence Questionnaire-Urinary Incontinence Short Form | NR                                   | 92.9%                      |
| Lee 2015          | #5274   | Transobturator midurethral sling no POP repair  | 57  | 12 mo            | Subjective cure         | Same as above                                                                                                                                                       | NR                                   | 90.7%                      |
| Van Leijssen 2013 | #9658   | Surgery                                         | 55  | 12 mo            | Subjective PGI-I cure   | Improved, very much and much improved                                                                                                                               | NR                                   | 91%                        |
| Van Leijssen 2013 | #9658   | Surgery                                         | 58  | 12mo             | Subjective UDI cure SUI | Negative answer on the Urogenital Distress Inventory question concerning urine leakage related to physical activities                                               | NR                                   | 74%                        |
| Van Leijssen      | #9658   | Surgery                                         | 58  | 12mo             | Subjective UDI          | No mixed UI                                                                                                                                                         | NR                                   | 71%                        |

| Study name        | Endnote | Intervention                                | N   | Follow-up period | Type of outcome         | Outcome description                                                                                                   | With or without containment products | % of patients with outcome |
|-------------------|---------|---------------------------------------------|-----|------------------|-------------------------|-----------------------------------------------------------------------------------------------------------------------|--------------------------------------|----------------------------|
| 2013              |         |                                             |     |                  | cure MUI                |                                                                                                                       |                                      |                            |
| Van Leijssen 2013 | #9658   | Surgery                                     | 53  | 12mo             | Objective cure          | No Leakage on 48 h bladder diary                                                                                      | NR                                   | 85%                        |
| Van Leijssen 2013 | #9658   | Individually tailored                       | 57  | 12 mo            | Subjective PGI-I cure   | Improved, very much and much improved                                                                                 | NR                                   | 91%                        |
| Van Leijssen 2013 | #9658   | Individually tailored                       | 56  | 12mo             | Subjective UDI cure SUI | Negative answer on the Urogenital Distress Inventory question concerning urine leakage related to physical activities | NR                                   | 75%                        |
| Van Leijssen 2013 | #9658   | Individually tailored                       | 55  | 12mo             | Subjective UDI cure MUI | No mixed UI                                                                                                           | NR                                   | 68%                        |
| Van Leijssen 2013 | #9658   | Individually tailored                       | 50  | 12mo             | Objective cure          | No Leakage on 48 h bladder diary                                                                                      | NR                                   | 82%                        |
| Van Leijssen 2013 | #9658   | Individual according to urodynamic findings | 325 | 12mo             | Subjective PGI-I cure   | Improved, very much and much improved                                                                                 | NR                                   | 92.6%                      |
| Van Leijssen 2013 | #9658   | Individual according to urodynamic findings | 335 | 12mo             | Subjective UDI cure SUI | Negative answer on the Urogenital Distress Inventory question concerning urine leakage related to physical activities | NR                                   | 72.2%                      |
| Van Leijssen 2013 | #9658   | Individual according to urodynamic findings | 335 | 12mo             | Subjective UDI cure MUI | No mixed UI                                                                                                           | NR                                   | 67%                        |
| North 2010        | #2955   | Minitape-TM                                 | 47  | 6m               | Cure                    | Negative pad test (weight gain of <1 g).                                                                              | With                                 | 27.7%                      |
| North 2010        | #2955   | Minitape-TM                                 | 31  | 12m              | Cure                    | Negative pad test (weight gain of <1 g).                                                                              | With                                 | 32.3%                      |
| North 2010        | #2955   | Minitape-TM                                 | 19  | 24m              | Cure                    | Negative pad test (weight gain of <1 g).                                                                              | With                                 | 31.6%                      |
| Primus 2006       | #4000   | SPARC sling                                 | 89  | 3m               | Objective cure          | Negative cough stress test and negative pad test                                                                      | With                                 | 83.1%                      |

| Study name          | Endnote | Intervention   | N   | Follow-up period | Type of outcome | Outcome description                                                                                         | With or without containment products | % of patients with outcome |
|---------------------|---------|----------------|-----|------------------|-----------------|-------------------------------------------------------------------------------------------------------------|--------------------------------------|----------------------------|
|                     |         |                |     |                  |                 | (0–1 g)                                                                                                     |                                      |                            |
| Primus 2006         | #4000   | SPARC sling    | 79  | 6m               | Objective cure  | Same as above                                                                                               | With                                 | 82.3%                      |
| Primus 2006         | #4000   | SPARC sling    | 64  | 12m              | Objective cure  | Same as above                                                                                               | With                                 | 84.4%                      |
| Primus 2006         | #4000   | SPARC sling    | 89  | 3m               | Subjective cure | No urine loss during daily activities/no usage of pads.                                                     | With                                 | 79.8%                      |
| Primus 2006         | #4000   | SPARC sling    | 79  | 6m               | Subjective cure | Same as above                                                                                               | With                                 | 81%                        |
| Primus 2006         | #4000   | SPARC sling    | 64  | 12m              | Subjective cure | Same as above                                                                                               | With                                 | 75%                        |
| Palomba 2014        | #4757   | r-TVT          | 117 | 6mo              | Subjective      | Proportion of women who reported being either “dry” or “improved,”                                          | NR                                   | 94.9%                      |
| Palomba 2014        | #4757   | r-TVT          | 115 | 12mo             | Subjective      | Same as above                                                                                               | NR                                   | 83.5%                      |
| Palomba 2014        | #4757   | r-TVT          | 111 | 18mo             | Subjective      | Same as above                                                                                               | NR                                   | 82.9%                      |
| Palomba 2014        | #4757   | r-TVT          | 106 | 24mo             | Subjective      | Same as above                                                                                               | NR                                   | 84.0%                      |
| Palomba 2014        | #4757   | r-TVT          | 117 | 6mo              | Objective cure  | No leakage of urine during the stress test                                                                  | NR                                   | 89.7%                      |
| Palomba 2014        | #4757   | r-TVT          | 115 | 12mo             | Objective cure  | No leakage of urine during the stress test                                                                  | NR                                   | 86.1%                      |
| Palomba 2014        | #4757   | r-TVT          | 111 | 18mo             | Objective cure  | No leakage of urine during the stress test                                                                  | NR                                   | 80.1%                      |
| Palomba 2014        | #4757   | r-TVT          | 106 | 24mo             | Objective cure  | No leakage of urine during the stress test                                                                  | NR                                   | 77.4%                      |
| Freeman 2011        | #2539   | Retropubic TVT | 92  | 12m              | Cure            | Absence of SUI                                                                                              | NR                                   | 65.5%                      |
| Houwert 2010        | #2950   | Retropubic TVT | 257 | 12m              | Cure            | Statement of the woman of not experiencing any loss of urine upon physical activity, coughing, or sneezing. | NR                                   | 81%                        |
| Houwert 2009        | #10629  | Retropubic TVT | 257 | 14m              | Cure            | Statement of the woman of not experiencing any loss of urine on physical exercise.                          | NR                                   | 83%                        |
| <b>Women- Sling</b> |         |                |     |                  |                 |                                                                                                             |                                      |                            |
| Mostafa 2013        | #1538   | SIMS           | 68  | 4 to             | Success         | Patient reported success rate, defined as “very                                                             | NR                                   | 85.50%                     |

| Study name       | Endnote | Intervention                        | N   | Follow-up period | Type of outcome | Outcome description                                                                                                                                                              | With or without containment products | % of patients with outcome |
|------------------|---------|-------------------------------------|-----|------------------|-----------------|----------------------------------------------------------------------------------------------------------------------------------------------------------------------------------|--------------------------------------|----------------------------|
|                  |         |                                     |     | 6m               |                 | much improved" or "much improved" on the PGI-I                                                                                                                                   |                                      |                            |
| Mostafa 2013     | #1538   | SIMS                                | 69  | 1yr              | Success         | Patient reported success rate, defined as "very much improved" or "much improved" on the PGI-I                                                                                   | NR                                   | 58/69 (84%)                |
| Mostafa 2013     | #1538   | SIMS                                | 69  | 1yr              | Objectives cure | Negative Cough Stress Test (CST)                                                                                                                                                 | NR                                   | 56/69 (81.2%)              |
| Mostafa 2013     | #1538   | SIMS                                | 65  | 1yr              | Improvement QoL | >= 18 points improvement in total King's Health Questionnaire (KHQ) score                                                                                                        | NR                                   | 50/65 (76.9%)              |
| Schweitzer 2015  | #1199   | adjustable single-incision sling    | 87  | 12 m             | Objective cure  | Objective cure was defined as a negative stress cough test at a bladder volume of at least 300 mL                                                                                | NR                                   | 79/87 (90.8%)              |
| Schweitzer 2015  | #1199   | adjustable single-incision sling    | 92  | 12 m             | Subjective cure | Subjective cure defined as a negative answer to the Urogenital Distress Inventory question "Do you experience urine leakage related to physical activity, coughing or sneezing?" | NR                                   | 71/92 (77.2%)              |
| Schweitzer 2015  | #1199   | adjustable single-incision sling    | 90  | 12 m             | Improvement     | Much or very much improvement on the Patient Global Impression of Improvement scale                                                                                              | NR                                   | 81/90 (90%)                |
| NCT01272284 2011 | # 14621 | Altis® Single Incision Sling System | 103 | 6m               | Cure            | Negative Cough Stress Test at 6 Months                                                                                                                                           | With pads                            | 92.20%                     |
| NCT01272284 2011 | # 14621 | Altis® Single Incision Sling System | 101 | 12m              | Cure            | Negative Cough Stress Test at 12 Months                                                                                                                                          | With pads                            | 90.10%                     |
| NCT01272284 2011 | # 14621 | Altis® Single Incision Sling System | 103 | 6m               | Improvement     | At Least 50% Reduction in 24-hour Pad Weight From Baseline to 6 Months                                                                                                           | With pads                            | 85.40%                     |
| NCT01272284 2011 | # 14621 | Altis® Single Incision Sling System | 101 | 12m              | Improvement     | At Least 50% Reduction in 24-hour Pad Weight From Baseline to 12 Months                                                                                                          | With pads                            | 90.10%                     |

| Study name       | Endnote | Intervention                        | N   | Follow-up period | Type of outcome        | Outcome description                                                                               | With or without containment products | % of patients with outcome |
|------------------|---------|-------------------------------------|-----|------------------|------------------------|---------------------------------------------------------------------------------------------------|--------------------------------------|----------------------------|
| NCT01272284 2011 | # 14621 | Altis® Single Incision Sling System | 92  | 6m               | Improvement            | At Least 50% Improvement in Incontinence Via 3-Day Voiding Diary From Baseline to 6 Months        | With pads                            | 88.00%                     |
| Natale 2014      | #4664   | Single-Incision-Sling               | 92  | 2y               | Objectives cure        | Negative Cough Stress Test (CST)                                                                  | NR                                   | 83.7%                      |
| Natale 2014      | #4664   | Single-Incision-Sling               | 92  | 2y               | Subjective on PGI-I    | Much or very much improved                                                                        | NR                                   | 81.5%                      |
| Palomba 2014     | #4757   | Single-Incision-Sling               | 118 | 6mo              | Subjective             | Proportion of women who reported being either “dry” or “improved,”                                | NR                                   | 90.7%                      |
| Palomba 2014     | #4757   | Single-Incision-Sling               | 113 | 12mo             | Subjective             | Same as above                                                                                     | NR                                   | 63.7%                      |
| Palomba 2014     | #4757   | Single-Incision-Sling               | 108 | 18mo             | Subjective             | Same as above                                                                                     | NR                                   | 56.5%                      |
| Palomba 2014     | #4757   | Single-Incision-Sling               | 103 | 24mo             | Subjective             | Same as above                                                                                     | NR                                   | 55.3%                      |
| Palomba 2014     | #4757   | Single-Incision-Sling               | 118 | 6mo              | Objective cure         | No leakage of urine during the stress test                                                        | NR                                   | 81.3%                      |
| Palomba 2014     | #4757   | Single-Incision-Sling               | 113 | 12mo             | Objective cure         | No leakage of urine during the stress test                                                        | NR                                   | 63.7%                      |
| Palomba 2014     | #4757   | Single-Incision-Sling               | 108 | 18mo             | Objective cure         | No leakage of urine during the stress test                                                        | NR                                   | 52.8%                      |
| Palomba 2014     | #4757   | Single-Incision-Sling               | 103 | 24mo             | Objective cure         | No leakage of urine during the stress test                                                        | NR                                   | 50.5%                      |
| Dias 2014        | #4991   | Single-incision sling               | 50  | 1yr              | Subjective cure        | ICIQ-SF =0                                                                                        | NR                                   | 84%                        |
| Dias 2014        | #4991   | Single-incision sling               | 50  | 1yr              | Subjective improvement | ICIQ-SF lower than the preoperative but >0 AND subjective perception of improvement/ satisfaction | NR                                   | 8%                         |
| Dias 2014        | #4991   | Single-incision sling               | 50  | 1yr              | Objective cure         | No leakage of urine during a CST and patient-reported no pad usage                                | Without                              | 90.2%                      |



| Study name | Endnote | Intervention                        | N   | Follow-up period | Type of outcome        | Outcome description                                                                                                                                                 | With or without containment products | % of patients with outcome |
|------------|---------|-------------------------------------|-----|------------------|------------------------|---------------------------------------------------------------------------------------------------------------------------------------------------------------------|--------------------------------------|----------------------------|
| Dias 2014  | #4991   | Single-incision sling               | 50  | 3 mo             | Subjective cure        | ICIQ-SF =0                                                                                                                                                          | NR                                   | 88.5%                      |
| Dias 2014  | #4991   | Single-incision sling               | 50  | 3 mo             | Subjective improvement | ICIQ-SF lower than the preoperative but >0 AND subjective perception of improvement/ satisfaction                                                                   | NR                                   | 5.8%                       |
| Dias 2014  | #4991   | Single-incision sling               | 50  | 3mo              | Objective cure         | No leakage of urine during a CST and patient-reported no pad usage                                                                                                  | Without                              | 94.1%                      |
| Dias 2014  | #4991   | Single-incision sling               | 50  | 6 mo             | Subjective cure        | ICIQ-SF =0                                                                                                                                                          | NR                                   | 82.0%                      |
| Dias 2014  | #4991   | Single-incision sling               | 50  | 6 mo             | Subjective improvement | ICIQ-SF lower than the preoperative but >0 AND subjective perception of improvement/ satisfaction                                                                   | NR                                   | 12%                        |
| Dias 2014  | #4991   | Single-incision sling               | 50  | 6 mo             | Objective cure         | No leakage of urine during a CST and patient-reported no pad usage                                                                                                  | Without                              | 89.8%                      |
| Lee 2015   | #5274   | Single-incision sling               | 95  | 6 mo             | Objective cure         | Negative urodynamic stress or cough stress test                                                                                                                     | NR                                   | 81.1%                      |
| Lee 2015   | #5274   | Single-incision sling               | 89  | 12 mo            | Objective cure         | Negative urodynamic stress or cough stress test                                                                                                                     | NR                                   | 94.4%                      |
| Lee 2015   | #5274   | Single-incision sling               | 110 | 6 mo             | Subjective cure        | No recorded leakage with coughing and exercise on questions 3 and 5 of the International Consultation on Incontinence Questionnaire-Urinary Incontinence Short Form | NR                                   | 95.5%                      |
| Lee 2015   | #5274   | Single-incision sling               | 103 | 12 mo            | Subjective cure        | Same as above                                                                                                                                                       | NR                                   | 92.2%                      |
| Lee 2015   | #5274   | Single-incision sling no POP repair | 58  | 6 mo             | Objective cure         | Negative urodynamic stress or cough stress test                                                                                                                     | NR                                   | 81%                        |
| Lee 2015   | #5274   | Single-incision sling no POP repair | 51  | 12 mo            | Objective cure         | Negative urodynamic stress or cough stress test                                                                                                                     | NR                                   | 92.2%                      |

| Study name    | Endnote | Intervention                                            | N  | Follow-up period | Type of outcome | Outcome description                                                                                                                                                 | With or without containment products  | % of patients with outcome |
|---------------|---------|---------------------------------------------------------|----|------------------|-----------------|---------------------------------------------------------------------------------------------------------------------------------------------------------------------|---------------------------------------|----------------------------|
| Lee 2015      | #5274   | Single-incision sling no POP repair                     | 66 | 6 mo             | Subjective cure | No recorded leakage with coughing and exercise on questions 3 and 5 of the International Consultation on Incontinence Questionnaire-Urinary Incontinence Short Form | NR                                    | 95.5%                      |
| Lee 2015      | #5274   | Single-incision sling no POP repair                     | 62 | 12 mo            | Subjective cure | Same as above                                                                                                                                                       | NR                                    | 91.9%                      |
| Cornu 2012    | #1969   | Ajust-TM single incision transobturator sling procedure | 95 | 6m               | Success         | No pad use or one dry security pad.                                                                                                                                 | Without and with containment products | 83%                        |
| Cornu 2012    | #1969   | Ajust-TM single incision transobturator sling procedure | 95 | 12m              | Success         | No pad use or one dry security pad.                                                                                                                                 | Without and with containment products | 80%                        |
| Cornu 2012    | #1969   | Ajust-TM single incision transobturator sling procedure | 90 | 18m              | Success         | No pad use or one dry security pad.                                                                                                                                 | Without and with containment products | 95%                        |
| Guerrero 2010 | #2702   | Autologous fascial sling                                | 79 | 6m               | Cure            | Completely dry                                                                                                                                                      | NR                                    | 44%                        |
| Guerrero 2010 | #2702   | Autologous fascial sling                                | 79 | 12m              | Cure            | Completely dry                                                                                                                                                      | NR                                    | 41%                        |
| Guerrero 2010 | #2702   | Autologous fascial sling                                | 79 | 6m               | Improvement     | Either completely dry or who reported that their urinary incontinence was improved at 6 weeks                                                                       | NR                                    | 87%                        |
| Guerrero 2010 | #2702   | Autologous                                              | 79 | 12m              | Improvement     | Either completely dry or who reported that their                                                                                                                    | NR                                    | 76%                        |

| Study name                    | Endnote | Intervention                          | N   | Follow-up period | Type of outcome  | Outcome description                              | With or without containment products | % of patients with outcome |
|-------------------------------|---------|---------------------------------------|-----|------------------|------------------|--------------------------------------------------|--------------------------------------|----------------------------|
|                               |         | fascial sling                         |     |                  |                  | urinary incontinence was improved at 6 weeks     |                                      |                            |
| <b>Women- Colposuspension</b> |         |                                       |     |                  |                  |                                                  |                                      |                            |
| Carey 2006                    | #11686  | Colposuspension on Burch open         | 92  | 6mo              | Cure objective   | no SUI on urodynamics                            | NR                                   | 22%                        |
| Carey 2006                    | #11686  | Colposuspension on Burch open         | 92  | 6mo              | Cure objective   | no SUI or detrusor overactivity on urodynamics   | NR                                   | 32%                        |
| Carey 2006                    | #11686  | Colposuspension on Burch open         | 90  | 24 mo            | Cure self report | no SUI                                           | NR                                   | 70%                        |
| Carey 2006                    | #11686  | Colposuspension on Burch open         | 90  | 24 mo            | Cure self report | no urge incontinence                             | NR                                   | 50.6%                      |
| Carey 2006                    | #11686  | Colposuspension on Burch laparoscopic | 83  | 6mo              | Cure objective   | no SUI on urodynamics                            | NR                                   | 28%                        |
| Carey 2006                    | #11686  | Colposuspension on Burch laparoscopic | 83  | 6mo              | Cure objective   | no SUI or detrusor overactivity on urodynamics   | NR                                   | 36%                        |
| Carey 2006                    | #11686  | Colposuspension on Burch laparoscopic | 77  | 24 mo            | Cure self report | no SUI                                           | NR                                   | 62%                        |
| Carey 2006                    | #11686  | Colposuspension on Burch laparoscopic | 77  | 24 mo            | Cure self report | No urge incontinence                             | NR                                   | 43%                        |
| Ward 2008                     | #3630   | Colposuspension                       | 49  | 5y               | Cure             | Negative 1-hour pad test (<1 g change in weight) | With                                 | 90%                        |
| Ward 2008                     | #3630   | Colposuspension                       | 79  | 5y               | Subjective Cure  | Positive response to BFLUTS questionnaire item 8 | With                                 | 70%                        |
| <b>Women- Other</b>           |         |                                       |     |                  |                  |                                                  |                                      |                            |
| Houwert 2009                  | #10629  | All surgeries                         | 437 | 14m              | Cure             | Statement of the woman of not experiencing any   | NR                                   | 79%                        |

| Study name                       | Endnote | Intervention  | N   | Follow-up period | Type of outcome              | Outcome description                                                                                                       | With or without containment products | % of patients with outcome |
|----------------------------------|---------|---------------|-----|------------------|------------------------------|---------------------------------------------------------------------------------------------------------------------------|--------------------------------------|----------------------------|
|                                  |         | together      |     |                  |                              | loss of urine on physical exercise.                                                                                       |                                      |                            |
| <b>Women – PFMT (Supervised)</b> |         |               |     |                  |                              |                                                                                                                           |                                      |                            |
| Labrie 2013                      | #13133  | Physiotherapy | 174 | 12 mo            | Subjective cure              | Negative response to the question, “Do you experience urine leakage related to physical activity, coughing, or sneezing?” | NR                                   | 53.4%                      |
| Labrie 2013                      | #13133  | Physiotherapy | 160 | 12 mo            | Objective cure               | No incontinence during a cough stress test at a bladder volume of at least 300 ml                                         | NR                                   | 58.8%                      |
| Labrie 2013                      | #13133  | Physiotherapy | 174 | 12 mo            | PGI-S cure                   | No symptoms                                                                                                               | NR                                   | 65.5%                      |
| Labrie 2013                      | #13133  | Physiotherapy | 174 | 12 mo            | PGI-I Improvement            | Much better or very much better                                                                                           | NR                                   | 64.4%                      |
| Labrie 2013                      | #13133  | Physiotherapy | 189 | 4mo              | PGI-S cure                   | No symptoms                                                                                                               | NR                                   | 31.2%                      |
| Labrie 2013                      | #13133  | Physiotherapy | 190 | 4mo              | PGI-I Improvement            | Much better or very much better                                                                                           | NR                                   | 31.1%                      |
| Labrie 2013                      | #13133  | Physiotherapy | 182 | 6mo              | PGI-S cure                   | No symptoms                                                                                                               | NR                                   | 41.8%                      |
| Labrie 2013                      | #13133  | Physiotherapy | 182 | 6mo              | PGI-I Improvement            | Much better or very much better                                                                                           | NR                                   | 44.5%                      |
| Labrie 2013                      | #13133  | Physiotherapy | 159 | 18mo             | PGI-S cure                   | No symptoms                                                                                                               | NR                                   | 73.6%                      |
| Labrie 2013                      | #13133  | Physiotherapy | 159 | 18mo             | PGI-I Improvement            | Much better or very much better                                                                                           | NR                                   | 74.8%                      |
| Liebergall-Wischnitzer 2013      | #3257   | PFMT          | 79  | 6m               | Subjective Cure              | No pad use on telephone interview                                                                                         | With                                 | 39.7%                      |
| Kondo 2007                       | #3822   | PFMT          | 112 | 2y               | Subjective treatment success | Self-reported completely cured or more than 50% improved                                                                  | NR                                   | 40%                        |
| Kondo 2007                       | #3822   | PFMT          | 79  | 8y               | Subjective cure              | Self-reported completely cured.                                                                                           | NR                                   | 17%                        |
| Kondo 2007                       | #3822   | PFMT          | 79  | 8y               | Subjective                   | Self-reported more than 50% improvement.                                                                                  | NR                                   | 23%                        |

| Study name                         | Endnote | Intervention        | N   | Follow-up period | Type of outcome              | Outcome description                                       | With or without containment products | % of patients with outcome |
|------------------------------------|---------|---------------------|-----|------------------|------------------------------|-----------------------------------------------------------|--------------------------------------|----------------------------|
|                                    |         |                     |     |                  | improvement                  |                                                           |                                      |                            |
| Kondo 2007                         | #3822   | PFMT                | 79  | 8y               | Subjective treatment success | Self-reported completely cured or more than 50% improved  | NR                                   | 39%                        |
| Williams 2006                      | #4019   | Intensive PFMT      | 77  | 3m               | Cure                         | No symptoms                                               | NR                                   | 5%                         |
| Lee 2013                           | #1656   | PFMT+biofeed back   | 71  | 12 wks           | Objective cure               | 2 g or less of leakage with a standardized bladder volume | NR                                   | 52.9%                      |
| Lee 2013                           | #1656   | PFMT+biofeed back   | 56  | 12m              | Subjective cure              | Questionnaire- if experienced incontinence                | NR                                   | 26.8%                      |
| Liebergall-Wischnitzer 2013        | #3257   | Paula method        | 64  | 6m               | Subjective Cure              | No pad use on telephone interview                         | With                                 | 37.1%                      |
| <b>Women – PFMT (Unsupervised)</b> |         |                     |     |                  |                              |                                                           |                                      |                            |
| Sjostrom 2015                      | #15548  | Internet based PFMT | 105 | 4m               | Improvement on PGI-I         | Very much or much improved                                | NR                                   | 40.9%                      |
| Sjostrom 2015                      | #15548  | Postal based PFMT   | 113 | 4m               | Improvement on PGI-I         | Very much or much improved                                | NR                                   | 26.5%                      |
| Sjostrom 2015                      | #15548  | Internet based PFMT | 105 | 4m               | Improvement - satisfaction   | Good or very good by patient                              | NR                                   | 84.8%                      |
| Sjostrom 2015                      | #15548  | Postal based PFMT   | 113 | 4m               | Improvement - satisfaction   | Good or very good by patient                              | NR                                   | 62.9%                      |
| Sjostrom 2015                      | #15548  | Internet based PFMT | 105 | 4m               | Improvement - aids usage     | Stopped using or reduced their usage of UI aids           | With pads                            | 59.5%                      |
| Sjostrom 2015                      | #15548  | Postal based PFMT   | 113 | 4m               | Improvement - aids usage     | Stopped using or reduced their usage of UI aids           | With pads                            | 41.4%                      |
| Sjostrom 2015                      | #15548  | Internet based PFMT | 88  | 1y               | Improvement on PGI-I         | Very much or much improved                                | NR                                   | 31.9%                      |

| Study name                                   | Endnote | Intervention                             | N   | Follow-up period | Type of outcome            | Outcome description          | With or without containment products | % of patients with outcome |
|----------------------------------------------|---------|------------------------------------------|-----|------------------|----------------------------|------------------------------|--------------------------------------|----------------------------|
| Sjostrom 2015                                | #15548  | Postal based PFMT                        | 80  | 1y               | Improvement on PGI-I       | Very much or much improved   | NR                                   | 33.8%                      |
| Sjostrom 2015                                | #15548  | Internet based PFMT                      | 86  | 1y               | Improvement - satisfaction | Good or very good by patient | NR                                   | 69.8%                      |
| Sjostrom 2015                                | #15548  | Postal based PFMT                        | 76  | 1y               | Improvement - satisfaction | Good or very good by patient | NR                                   | 60.5%                      |
| Sjostrom 2015                                | #15548  | Internet based PFMT                      | 74  | 2y               | Improvement on PGI-I       | Very much or much improved   | NR                                   | 39.2%                      |
| Sjostrom 2015                                | #15548  | Postal based PFMT                        | 80  | 2y               | Improvement on PGI-I       | Very much or much improved   | NR                                   | 23.8%                      |
| Sjostrom 2015                                | #15548  | Internet based PFMT                      | 74  | 2y               | Improvement - satisfaction | Good or very good by patient | NR                                   | 64.9%                      |
| Sjostrom 2015                                | #15548  | Postal based PFMT                        | 79  | 2y               | Improvement - satisfaction | Good or very good by patient | NR                                   | 58.2%                      |
| <b>Women- Vaginal cone therapy</b>           |         |                                          |     |                  |                            |                              |                                      |                            |
| Williams 2006                                | #4019   | Vaginal cone therapy                     | 79  | 3m               | Cure                       | No symptoms                  | NR                                   | 9%                         |
| <b>Women-Lifestyle Advice (Unsupervised)</b> |         |                                          |     |                  |                            |                              |                                      |                            |
| Williams 2006                                | #4019   | Continued primary behaviour intervention | 75  | 3m               | Cure                       | No symptoms                  | NR                                   | 8%                         |
| <b>Women – Bulking agents</b>                |         |                                          |     |                  |                            |                              |                                      |                            |
| Ghoniem 2009                                 | #3326   | Bulking agent-Macroplastique             | 122 | 12 mo            | Success                    | Stamey scale dry (0)         | NR                                   | 36.9%                      |
| Ghoniem 2009                                 | #3326   | Bulking agent-Macroplastique             | 122 | 12 mo            | Improvement                | Stamey scale 1 grade         | NR                                   | 61.5%                      |

| Study name   | Endnote | Intervention                 | N   | Follow-up period | Type of outcome                  | Outcome description           | With or without containment products | % of patients with outcome |
|--------------|---------|------------------------------|-----|------------------|----------------------------------|-------------------------------|--------------------------------------|----------------------------|
|              |         | e                            |     |                  |                                  |                               |                                      |                            |
| Ghoniem 2009 | #3326   | Bulking agent-Macroplastique | 102 | 12 mo            | Success subjective patient       | Subjective cured              | NR                                   | 33.3%                      |
| Ghoniem 2009 | #3326   | Bulking agent-Macroplastique | 102 | 12 mo            | Improvement subjective patient   | Subjective marked improvement | NR                                   | 44.1%                      |
| Ghoniem 2009 | #3326   | Bulking agent-Macroplastique | 102 | 12 mo            | Improvement subjective patient   | Subjective slight improvement | NR                                   | 14.7%                      |
| Ghoniem 2009 | #3326   | Bulking agent-Macroplastique | 102 | 12 mo            | Success subjective physician     | Subjective cured              | NR                                   | 42.2%                      |
| Ghoniem 2009 | #3326   | Bulking agent-Macroplastique | 102 | 12 mo            | Improvement subjective physician | Subjective marked improvement | NR                                   | 38.2%                      |
| Ghoniem 2009 | #3326   | Bulking agent-Macroplastique | 102 | 12 mo            | Improvement subjective physician | Subjective slight improvement | NR                                   | 13.7%                      |
| Ghoniem 2009 | #3326   | Bulking agent-Macroplastique | 67  | 12 mo            | Success                          | Stamey scale dry (0)          | NR                                   | 57%                        |
| Ghoniem 2009 | #3326   | Bulking agent-Macroplastique | 67  | 12 mo            | Improvement                      | Stamey scale 1 grade          | NR                                   | 43%                        |
| Ghoniem 2009 | #3326   | Bulking agent-Macroplastique | 67  | 12 mo            | Success subjective patient       | Subjective cured              | NR                                   | 43%                        |

| Study name   | Endnote | Intervention                 | N   | Follow-up period | Type of outcome                  | Outcome description           | With or without containment products | % of patients with outcome |
|--------------|---------|------------------------------|-----|------------------|----------------------------------|-------------------------------|--------------------------------------|----------------------------|
| Ghoniem 2009 | #3326   | Bulking agent-Macroplastique | 67  | 12 mo            | Improvement subjective patient   | Subjective marked improvement | NR                                   | 48%                        |
| Ghoniem 2009 | #3326   | Bulking agent-Macroplastique | 67  | 12 mo            | Improvement subjective patient   | Subjective slight improvement | NR                                   | 9%                         |
| Ghoniem 2009 | #3326   | Bulking agent-Macroplastique | 67  | 12 mo            | Objective improvement pad weight | >= 50% decrease in urine loss | NR                                   | 81%                        |
| Ghoniem 2009 | #3326   | Bulking agent - Contigen     | 125 | 12 mo            | Success                          | Stamey scale dry (0)          | NR                                   | 24.8%                      |
| Ghoniem 2009 | #3326   | Bulking agent - Contigen     | 125 | 12 mo            | Improvement                      | Stamey scale 1 grade          | NR                                   | 48%                        |
| Ghoniem 2009 | #3326   | Bulking agent - Contigen     | 94  | 12 mo            | Success subjective patient       | Subjective cured              | NR                                   | 26.6%                      |
| Ghoniem 2009 | #3326   | Bulking agent - Contigen     | 94  | 12 mo            | Improvement subjective patient   | Subjective marked improvement | NR                                   | 41.5%                      |
| Ghoniem 2009 | #3326   | Bulking agent - Contigen     | 94  | 12 mo            | Improvement subjective patient   | Subjective slight improvement | NR                                   | 20.2%                      |
| Ghoniem 2009 | #3326   | Bulking agent - Contigen     | 94  | 12 mo            | Success subjective physician     | Subjective cured              | NR                                   | 34%                        |
| Ghoniem 2009 | #3326   | Bulking agent - Contigen     | 94  | 12 mo            | Improvement subjective physician | Subjective marked improvement | NR                                   | 40.4%                      |
| Ghoniem 2009 | #3326   | Bulking agent -              | 94  | 12 mo            | Improvement                      | Subjective slight improvement | NR                                   | 14.9%                      |



| Study name               | Endnote | Intervention       | N   | Follow-up period | Type of outcome      | Outcome description                                                                                                                                                                                   | With or without containment products | % of patients with outcome |
|--------------------------|---------|--------------------|-----|------------------|----------------------|-------------------------------------------------------------------------------------------------------------------------------------------------------------------------------------------------------|--------------------------------------|----------------------------|
|                          |         | Contigen           |     |                  | subjective physician |                                                                                                                                                                                                       |                                      |                            |
| <b>Women- Duloxetine</b> |         |                    |     |                  |                      |                                                                                                                                                                                                       |                                      |                            |
| Schagen van Leeuwen 2008 | #11523  | Duloxetine         | 126 | 12 wks           | Improvement IEF      | Responder IEF: ≥50% reduction in Incontinence Episode Frequency (IEF) from baseline to endpoint.                                                                                                      | Without                              | 57%                        |
| Schagen van Leeuwen 2008 | #11523  | Duloxetine         | 128 | 12 wks           | Improvement I-QoL    | Responder I-QoL: increase in the I-QOL total score of ≥6.3 points from baseline to endpoint.                                                                                                          | Without                              | 55%                        |
| Schagen van Leeuwen 2008 | #11523  | Duloxetine         | 129 | 12 wks           | Improvement PGI-I    | Very much better or much better PGI-I                                                                                                                                                                 | Without                              | 53.5%                      |
| Viktrup 2007             | #10965  | Duloxetine         | 409 | 12 wks           | Improvement          | Patients aged <50 years. Better in PGI-I                                                                                                                                                              | Without                              | 62.5%                      |
| Viktrup 2007             | #10965  | Duloxetine         | 549 | 12 wks           | Improvement          | Patients aged ≥50 years. Better in PGI-I                                                                                                                                                              | Without                              | 66.2%                      |
| <b>MEN</b>               |         |                    |     |                  |                      |                                                                                                                                                                                                       |                                      |                            |
| <b>Male Sling</b>        |         |                    |     |                  |                      |                                                                                                                                                                                                       |                                      |                            |
| Zuckerman 2014           | #1334   | AdVance male sling | 102 | 12m              | Success              | Success was defined as a dry safety pad or less per day postoperatively (cured) or both a >50% improvement in pad use and patient satisfaction with the surgical outcome (improved).                  | with pads                            | 76/102 (74%)               |
| Zuckerman 2014           | #1334   | AdVance male sling | 102 | 24 m             | Success              | Same as above                                                                                                                                                                                         | with pads                            | 71/102 (70%)               |
| Zuckerman 2014           | #1334   | AdVance male sling | 102 | 36.2 m           | Overall Success      | Final follow up. Success was defined as a dry safety pad or less per day postoperatively (cured) or both a >50% improvement in pad use and patient satisfaction with the surgical outcome (improved). | with pads                            | 63/102 (62%)               |
| Zuckerman 2014           | #1334   | AdVance male sling | 102 | 12 m             | Cure                 | Cure was defined as a dry safety pad or less per day postoperatively (cured)                                                                                                                          | with pads                            | 59/102 (58%)               |
| Zuckerman 2014           | #1334   | AdVance male sling | 102 | 24 m             | Cure                 | Cure was defined as a dry safety pad or less per day postoperatively (cured)                                                                                                                          | with pads                            | 49/102 (48%)               |
| Zuckerman                | #1334   | AdVance male       | 102 | 36.2 m           | Overall Cure         | Final follow up. Cure was defined as a dry safety                                                                                                                                                     | with pads                            | 41/102                     |

| Study name             | Endnote | Intervention       | N   | Follow-up period | Type of outcome       | Outcome description                                                                                           | With or without containment products  | % of patients with outcome |
|------------------------|---------|--------------------|-----|------------------|-----------------------|---------------------------------------------------------------------------------------------------------------|---------------------------------------|----------------------------|
| 2014                   |         | sling              |     |                  |                       | pad or less per day postoperatively (cured)                                                                   |                                       | (40%)                      |
| Zuckerman 2014         | #1334   | AdVance male sling | 102 | 12 m             | Improvement           | A >50% improvement in pad use and patient satisfaction with the surgical outcome (improved).                  | with pads                             | 22/102 (22%)               |
| Zuckerman 2014         | #1334   | AdVance male sling | 102 | 24 m             | Improvement           | Same as above                                                                                                 | with pads                             | 22/102 (22%)               |
| Zuckerman 2014         | #1334   | AdVance male sling | 102 | 36.2 m           | Overall Improvement   | Final follow up. A >50% improvement in pad use and patient satisfaction with the surgical outcome (improved). | with pads                             | 22/102 (22%)               |
| Serra 2013             | #9689   | Male sling         | 61  | 3 mo             | Objective cure        | No pad use                                                                                                    | Without                               | 80%                        |
| Serra 2013             | #9689   | Male sling         | 61  | 3 mo             | Objective improvement | ≥50% reduction of 24 h pad weight                                                                             | NR                                    | 8%                         |
| Bauer 2009             | #2979   | AdVance sling      | 113 | 6m               | Cure                  | No pad use or one pad that was used for security reasons and that stayed dry during the day.                  | With                                  | 55.8%                      |
| Bauer 2009             | #2979   | AdVance sling      | 113 | 6m               | Improvement           | One to two wet pads or a reduction of pads 50%.                                                               | With                                  | 27.4%                      |
| Bauer 2009             | #2979   | AdVance sling      | 70  | 12m              | Cure                  | No pad use or one pad that was used for security reasons and that stayed dry during the day.                  | With                                  | 51.4%                      |
| Bauer 2009             | #2979   | AdVance sling      | 70  | 12m              | Improvement           | One to two wet pads or a reduction of pads 50%.                                                               | With                                  | 25.7%                      |
| Rehder 2012            | #2053   | AdVance sling      | 85  | 12m              | Cure                  | No pad or one dry pad for security reason                                                                     | Without and with containment products | 53.80%                     |
| Rehder 2012            | #2053   | AdVance sling      | 151 | 3y               | Cure                  | No pad or one dry pad for security reason                                                                     | Without and with containment products | 53%                        |
| Bochove-Overgaauw 2011 | #2490   | Argus Sling        | 95  | 27m              | Cure                  | 0-1 security pad per 24h                                                                                      | With                                  | 54%                        |

| Study name                                  | Endnote | Intervention                                   | N   | Follow-up period | Type of outcome     | Outcome description                                                                                     | With or without containment products | % of patients with outcome |
|---------------------------------------------|---------|------------------------------------------------|-----|------------------|---------------------|---------------------------------------------------------------------------------------------------------|--------------------------------------|----------------------------|
| Bochove-Overgaauw 2011                      | #2490   | Argus Sling                                    | 95  | 27m              | Improvement         | 1-2 pads per 24h and >50% pad reduction                                                                 | With                                 | 18%                        |
| Lanoe 2009                                  | #10419  | Sub-urethral sling                             | 84  | 20 m             | Cure                | Dry patients                                                                                            | without pads                         | 38/84 (45.2%)              |
| Lanoe 2009                                  | #10419  | Sub-urethral sling                             | 84  | 20 m             | Improvement         | Patients reporting fewer pad usage than before.                                                         | With pads                            | 22/84 (26.2%)              |
| Lanoe 2009                                  | #10419  | Sub-urethral sling                             | 84  | 20 m             | Failure             | No improvement or condition worsened                                                                    | With pads                            | 24/84 (28.6%)              |
| <b>Men – PFMT (Supervised)</b>              |         |                                                |     |                  |                     |                                                                                                         |                                      |                            |
| Filocamo 2007                               | #11513  | PFMT                                           | 52  | 16 wks           | Cure                | Dry - the use of zero pads                                                                              | Without                              | 51.9%                      |
| Filocamo 2007                               | #11513  | PFMT                                           | 52  | 20 wks           | Cure                | Dry - the use of zero pads                                                                              | Without                              | 73%                        |
| Filocamo 2007                               | #11513  | PFMT                                           | 52  | 24 wks           | Cure                | dry - the use of zero pads                                                                              | Without                              | 78%                        |
| Marchiori 2010                              | #11411  | PFMT guided+biofeedback+electrical stimulation | 166 | 1 yr             | Success self report | Self report for the recovery of continence = no use of pads or a mild leakage needing 2 mini-pads a day | With                                 | 100%                       |
| <b>Men – PFMT (Unsupervised)</b>            |         |                                                |     |                  |                     |                                                                                                         |                                      |                            |
| Marchiori 2010                              | #11411  | PFMT                                           | 166 | 1 yr             | Success self report | Same as above                                                                                           | With                                 | 100%                       |
| <b>Men – PFMT (Supervised) + duloxetine</b> |         |                                                |     |                  |                     |                                                                                                         |                                      |                            |
| Filocamo 2007                               | #11513  | PFMT+duloxetine                                | 50  | 16 wks           | Cure                | dry - the use of zero pads                                                                              | Without                              | 78%                        |
| Filocamo 2007                               | #11513  | PFMT+duloxetine                                | 50  | 20 wks           | Cure                | dry - the use of zero pads                                                                              | Without                              | 46%                        |
| Filocamo 2007                               | #11513  | PFMT+duloxetine                                | 50  | 24 wks           | Cure                | dry - the use of zero pads                                                                              | Without                              | 62%                        |

Table S6: Study characteristics for patients with UUI

| Study name                    | Endnote | N    | Inclusion criteria                                                                                                                                                                                                                                                                                                                                                                                                                                                                                            | Mean/<br>Median<br>age (yrs) | % of<br>males | RoB<br>No.<br>Low * |
|-------------------------------|---------|------|---------------------------------------------------------------------------------------------------------------------------------------------------------------------------------------------------------------------------------------------------------------------------------------------------------------------------------------------------------------------------------------------------------------------------------------------------------------------------------------------------------------|------------------------------|---------------|---------------------|
| <b>WOMEN</b>                  |         |      |                                                                                                                                                                                                                                                                                                                                                                                                                                                                                                               |                              |               |                     |
| Chapple 2013 <sup>100</sup>   | #11434  | 2382 | More than 18 yr of age with symptoms of OAB (urinary frequency and urgency with or without urgency incontinence) $\geq$ 3 mo were eligible for the placebo run-in." "patients were eligible for randomization if they met the following criteria during the 3-d micturition diary period: average micturition frequency eight or more times per 24 h and three or more episodes of urgency (grade 3 or 4 using the Patient Perception of Intensity of Urgency Scale) with or without incontinence.            | 59.2/60.1<br>/59.6           | 26%           | 18                  |
| Visco 2012 <sup>102</sup>     | #15547  | 119  | Women; $\geq$ 5 episodes of urgency urinary incontinence, as recorded in a 3-day diary, and urgency-predominant urinary incontinence; not previously received anticholinergic drugs or had previously received up to two anticholinergic medications other than solifenacin, darifenacin, or trospium chloride; Ability to perform bladder catheterization by women or caregiver.                                                                                                                             | 56.7                         | 0%            | 18                  |
| Nitti 2013 <sup>103</sup>     | #9683   | 280  | $\geq$ 18 years; idiopathic OAB who experienced 3 or more urgency UI episodes in a 3-day period and an average of 8 or more micturitions per day were enrolled in the study; inadequately treated with prior anticholinergic therapy due to inadequate efficacy or intolerable side effects; a PVR of 100 ml or less and willing to perform CIC, if required.                                                                                                                                                 | 61.7                         | 10.8%         | 17                  |
| Yamaguchi 2007 <sup>116</sup> | #11732  | 713  | Men and women aged $\geq$ 20 years and with symptoms of OAB reported for $\geq$ 6 months were eligible for screening and study enrolment. To be eligible for randomization after the 2-week placebo run-in period, patients had to report a mean number of voids/24 h of $\geq$ 8, $\geq$ 3 episodes of urgency and/or $\geq$ 3 episodes of urgency incontinence during a 3-day voiding-diary period.                                                                                                         | 60                           | 15.6%         | 16                  |
| Chapple 2014 <sup>106</sup>   | #15555  | 1955 | Men and women aged $\geq$ 18 years with self-reported OAB symptoms for $\geq$ 6 months before screening; a mean of $\geq$ 8 micturitions and $\geq$ 2 and $\leq$ 15 UUI episodes/24 h (Urinary Sensation Scale [USS] rating of 5) captured in a 3-day diary at baseline who reported that their bladder caused at least some moderate problems on the Patient Perception of Bladder Condition (PPBC); able to complete micturition diaries and study related questionnaires and comply with study procedures. | 59                           | 19%           | 15                  |
| Herschorn 2013 <sup>108</sup> | #15552  | 511  | $\geq$ 18 years; OAB symptoms for $\geq$ 3 months for run-in and over a 3-day micturition diary period: an average $\geq$ 8 micturitions per 24 hours and $\geq$ 3 urgency episodes (grade 3 or 4 on the 5-point Patient Perception of Intensity of Urgency Scale), with or without incontinence.                                                                                                                                                                                                             | 60                           | 31.7%         | 15                  |
| Rovner 2011 <sup>104</sup>    | #11452  | 269  | Males and females; age 18–85 years; $\geq$ 50 kg weight; symptoms of idiopathic OAB with UUI for $\geq$ 6 months immediately prior to screening; 8 UUI episodes/week (with no more than 1                                                                                                                                                                                                                                                                                                                     | 60                           | 7.8%          | 15                  |

| Study name                     | Endnote | N    | Inclusion criteria                                                                                                                                                                                                                                                                                                                                                                                                                    | Mean/<br>Median<br>age (yrs) | % of<br>males | RoB<br>No.<br>Low * |
|--------------------------------|---------|------|---------------------------------------------------------------------------------------------------------------------------------------------------------------------------------------------------------------------------------------------------------------------------------------------------------------------------------------------------------------------------------------------------------------------------------------|------------------------------|---------------|---------------------|
|                                |         |      | incontinence-free day/week); urinary frequency (defined as an average of 8 micturitions/day); not adequately managed with $\geq 1$ anticholinergic drug (defined as an inadequate response to or intolerable side effects after $\geq 1$ month of therapy on an optimized dose), in the opinion of the investigator.                                                                                                                  |                              |               |                     |
| Dmochowski 2008 <sup>117</sup> | #10812  | 267  | $\geq 18$ years or older with OAB of $\geq 6$ months with symptoms of urinary frequency on 30day diary (a mean of $\geq 10$ toilet voids per day), urgency ( $\geq 1$ episodes of severe urgency associated with a toilet void), and UUI (a mean of 1 or more UUI episodes per day)                                                                                                                                                   | 61.2                         | 17.9%         | 15                  |
| Tincello 2012 <sup>91</sup>    | #11438  | 86   | OAB symptoms and DO on urodynamics $\leq 2$ yr; refractory to treatment (8wk of treatment with any anticholinergic drug); at least 8 voids and 2 moderate or severe urgency per 24 h on 3-d urinary diary data after stopping oral medication                                                                                                                                                                                         | 60.7<br>(Med)                | 0             | 15                  |
| Kaplan 2011 <sup>118</sup>     | #11473  | 1834 | Men and women; $\geq 18$ years; self-reported OAB symptoms for $\geq 3$ months and a mean of $\geq 1$ UUI episode and $\geq 8$ micturitions per 24 h in 3-day bladder diaries.                                                                                                                                                                                                                                                        | 58                           | 15.5%         | 14                  |
| Staskin 2007 <sup>119</sup>    | #15553  | 292  | Men and women; $\geq 18$ years; symptoms of OAB for $\geq 6$ months; Symptoms of urgency ( $\geq 1$ "severe" urgency severity rating per 3 days, as measured using a validated urgency severity scale (Indevus Urgency Severity Scale); minimum urinary frequency of $\geq 30$ toilet voids per 3 days with an average of $\geq 1$ UUI episode/day; Average total volume voided 3,000 ml or less per day and 250 ml or less per void. | 59.6                         | 14.8%         | 14                  |
| Rogers 2009 <sup>96</sup>      | #11496  | 161  | $\geq 18$ years; OAB symptoms for $\geq 3$ months; mean of $\geq 8$ micturitions per 24 h, including $\geq 0.6$ UUI episodes and $\geq 3$ OAB micturitions in 5-day bladder diaries; stable sexually active relationship with a male partner for $\geq 6$ months; "some moderate problems" related to their bladder condition on the Patient Perception of Bladder Condition questionnaire                                            | 49.5                         | 0             | 14                  |
| Liao 2013 <sup>26</sup>        | #15559  | 42   | Patients younger than 65 years, diagnosed with urodynamic IDO refractory to previous antimuscarinics for more than 3 months.                                                                                                                                                                                                                                                                                                          | 44.6                         | 35.7%         | 14                  |
| Herschorn 2010 <sup>105</sup>  | #11509  | 1277 | Men and women; age $\geq 18$ years; symptoms of OAB (self-assessed) for $\geq 3$ months before screening; a mean of $\geq 1$ UUI episode/24 h and $\geq 8$ voids/24 h in 3-day bladder diaries completed at baseline.                                                                                                                                                                                                                 | 58                           | 17.7%         | 13                  |
| Wyndaele 2009 <sup>115</sup>   | #10579  | 474  | Adults with OAB for $\geq 3$ months, $\geq 8$ micturitions per 24 h, mean number of urgency episodes $\geq 3$ per 24 h in a 5-day diary; rating bladder condition as $\geq$ "some moderate problems" on PPBAC who were dissatisfied with previous tolterodine or tolterodine ER therapy.                                                                                                                                              | 60                           | 23%           | 13                  |

| Study name                        | Endnote | N    | Inclusion criteria                                                                                                                                                                                                                                                                                                                                                                                                                                                                                                  | Mean/<br>Median<br>age (yrs) | % of<br>males | RoB<br>No.<br>Low * |
|-----------------------------------|---------|------|---------------------------------------------------------------------------------------------------------------------------------------------------------------------------------------------------------------------------------------------------------------------------------------------------------------------------------------------------------------------------------------------------------------------------------------------------------------------------------------------------------------------|------------------------------|---------------|---------------------|
| NCT00090584<br>2013 <sup>94</sup> | #13577  | 307  | Female; urge predominant incontinence; incontinent > 3 month; available for 8 months of follow up                                                                                                                                                                                                                                                                                                                                                                                                                   | 56.9                         | 0             | 13                  |
| Staskin 2011 <sup>113</sup>       | #10091  | 168  | Men and Women (≥18 years) self-reporting OAB symptoms for ≥3 months before screening, including a mean of ≥8 micturitions and ≥3 urgency episodes per 24 hr in a 3-day bladder diary at baseline, who rated their bladder condition at baseline as causing at least “some moderate problems” using the Patient Perception of Bladder Condition (PPBC) questionnaire.                                                                                                                                                | 58.8                         | 18%           | 13                  |
| Groen 2011 <sup>95</sup>          | #2358   | 60   | UUI refractory to conservative management; PNE revealed at least a 50% decrease in the number of incontinence episodes or pads used daily                                                                                                                                                                                                                                                                                                                                                                           | 48 (Med)                     | 0             | 13                  |
| Amundsen<br>2005 <sup>92</sup>    | #4293   | 55   | All patients failed previous conservative treatment. All patients met criteria for permanent implantation: a positive response during test stimulation - ≥50% reduction in incontinence episodes                                                                                                                                                                                                                                                                                                                    | 60                           | 7%            | 13                  |
| Duckett 2006 <sup>98</sup>        | #4217   | 51   | Fifty-one women, who had symptoms of both stress and urge incontinence and were proven to have idiopathic DO and USI on urodynamics, undergo regular review.                                                                                                                                                                                                                                                                                                                                                        | 52 (Med)                     | 0             | 13                  |
| Chapple<br>2005 <sup>109</sup>    | #11576  | 1177 | Men and women; ≥ 18 years; OAB symptoms (including urinary frequency, urgency or urge incontinence) for ≥ 3 months; being treated as outpatients; After 2-wk run-in criteria during the 3-day voiding diary period: an average of ≥8 micturitions per 24 hours; an average of ≥ 1 incontinence episode per 24 hours, or an average of 1 urgency episode per 24 hours.                                                                                                                                               | 56.5                         | 13%           | 12                  |
| Chapple<br>2007b <sup>110</sup>   | #10668  | 824  | OAB symptoms with urinary urgency for ≥ 6 mo; ≥18 yrs; ≥ 8 micturitions per 24 h and either ≥6 urgency episodes or ≥ 3 UUI episodes per 24 h; on a Likert scale that the condition caused them at least moderate problems.                                                                                                                                                                                                                                                                                          | 57                           | 20%           | 12                  |
| Surwitt 2009 <sup>97</sup>        | #10558  | 256  | Urge incontinence or mixed incontinence; all received conservative treatment                                                                                                                                                                                                                                                                                                                                                                                                                                        | 56 (Med)                     | 0             | 12                  |
| Siegel 2015 <sup>93</sup>         | #4552   | 147  | Diagnosis of OAB on a 3-day voiding diary with ≥8 voids/day and/or ≥2 involuntary leaking episodes in 72 hr; age ≥18. Failed or are not a candidate for more conservative treatment; Failed or could not tolerate at least one anticholinergic or antimuscarinic medication AND have at least one anticholinergic or antimuscarinic medication not yet attempted; On current regimen of OAB medications or have not been on any OAB medications, for at least 4 weeks prior to beginning the baseline voiding diary | 60.4                         | 7%            | 12                  |
| Karram<br>2009 <sup>114</sup>     | #10655  | 229  | Ambulatory men and women, age 18 or older, were eligible to participate. For this study, OAB was defined as having at least 1 urgency episode/24 h (on average), with or without urge incontinence, and usually accompanied by frequency (at least 8 micturitions/24 h), nocturia, or                                                                                                                                                                                                                               | 57                           | 15.8%         | 11                  |

| Study name                        | Endnote | N    | Inclusion criteria                                                                                                                                                                                                                                                                                                                                                                                                                                                                                                                                 | Mean/<br>Median<br>age (yrs) | % of<br>males | RoB<br>No.<br>Low * |
|-----------------------------------|---------|------|----------------------------------------------------------------------------------------------------------------------------------------------------------------------------------------------------------------------------------------------------------------------------------------------------------------------------------------------------------------------------------------------------------------------------------------------------------------------------------------------------------------------------------------------------|------------------------------|---------------|---------------------|
|                                   |         |      | both for at least 3 months, as documented in a 3-day diary before baseline.                                                                                                                                                                                                                                                                                                                                                                                                                                                                        |                              |               |                     |
| Haab 2006 <sup>90</sup>           | #11577  | 466  | Patients with overactive bladder (OAB) who completed two 12-week randomized, double-blind, placebo-controlled 'feeder' studies; able to complete patient diaries independently and capable of independent toileting                                                                                                                                                                                                                                                                                                                                | 57.3                         | 14.9%         | 10                  |
| Janssen Korea 2013 <sup>111</sup> | #14046  | 309  | Participants who fulfilled all of the following criteria in their micturition charts completed for 3 days prior to visit 2 (Baseline): mean voiding frequency greater than or equal to 8 times per 24 hours and mean frequency of urinary urgency greater than or equal to 2 times per 24 hours (urgency means sudden and strong urge to urinate and a urinary sensation scale score greater than or equal to 3 in the micturition chart). Participants with overactive bladder symptoms lasting for 3 months or longer prior to study initiation. | 54.9                         | 17.2%         | 10                  |
| Anderson 2006 <sup>107</sup>      | #11120  | 790  | "Women with OAB aged 18 years and older who documented 21 to 60 UUI episodes per week and an average of ten or more voids per 24 h were recruited for the study. The patients with mixed incontinence (both urge and stress incontinence) were eligible if urge episodes predominated."                                                                                                                                                                                                                                                            | 60                           | 0%            | 9                   |
| Sand 2012 <sup>112</sup>          | #6213   | 280  | Idiopathic OAB with $\geq 3$ urgency UI episodes over a 3-day period, and an average of $\geq 8$ micturitions/day. All had been inadequately managed by prior anticholinergic therapy.                                                                                                                                                                                                                                                                                                                                                             | 61.3                         | 10.8%         | 7                   |
| Staskin 2006 <sup>40</sup>        | #11558  | 535  | Men and women; $\geq 18$ years; symptoms of OAB (including urinary frequency, urgency, or urge incontinence) for 3 months; $\geq 8$ micturitions per 24 hours AND $\geq 1$ urgency episode per 24 hours or $\geq 1$ incontinence episode per 24 hours; For extension: had to have completed treatment in the previous double-blind studies $\leq 14$ days prior to extension-study entry.                                                                                                                                                          | 56.4                         | 22%           | 6                   |
| <b>MEN</b>                        |         |      |                                                                                                                                                                                                                                                                                                                                                                                                                                                                                                                                                    |                              |               |                     |
| Glazener 2011 <sup>99</sup>       | #847    | 788  | Between January, 2005, and September, 2008, we identified men having prostate surgery in 34 UK centres and invited them to receive a screening questionnaire 3 weeks after surgery. Those who reported urinary incontinence in this questionnaire were invited for random assignment into our study groups.                                                                                                                                                                                                                                        | 62.4/62.3<br>/68.2/67.<br>9  | 100%          | 18                  |
| Drake 2015 <sup>101</sup>         | #15546  | 1004 | Men aged 45 yr, with International Prostate Symptom Score (IPSS) $\geq 13$ , a maximum urinary flow rate (Qmax) of 4.0–12.0 ml/s, ultrasound-estimated prostate size $< 75$ ml, two or more urgency episodes per 24 h (Patient Perception of Intensity of Urgency Scale [PPIUS] grade 3 or 4) and eight or more micturitions per 24 h                                                                                                                                                                                                              | 65.1                         | 100%          | 13                  |

\*) Number of low risk items in the Risk of Bias assessment (out of 20 items in total – See Table 5)

Table S7: Treatment characteristics in studies for patients with UUI

| Study name                    | Endnote | Treatment      | Further details of intervention                                                                                                                                                                                                                                                                                                        | Duration of treatment |
|-------------------------------|---------|----------------|----------------------------------------------------------------------------------------------------------------------------------------------------------------------------------------------------------------------------------------------------------------------------------------------------------------------------------------|-----------------------|
| <b>WOMEN</b>                  |         |                |                                                                                                                                                                                                                                                                                                                                        |                       |
| <b>Women – Antimuscarinic</b> |         |                |                                                                                                                                                                                                                                                                                                                                        |                       |
| Siegel 2015                   | #4552   | Antimuscarinic | another antimuscarinic medication according to physician discretion, or restarted the discontinued medication                                                                                                                                                                                                                          | 6 months              |
| Haab 2006                     | #11577  | Darifenacin    | darifenacin CR 7.5 mg for 2 weeks, then individualized dosing: permitted to increase dose to 15 mg if required. Thereafter doses could be increased from 7.5 to 15 mg or decreased from 15 to 7.5 mg, as needed                                                                                                                        | 24 months             |
| Staskin 2011                  | #10091  | Fesoterodine   | Oral daily 4mg for 2 weeks and 8mg for 10 weeks                                                                                                                                                                                                                                                                                        | 12 wks                |
| Wyndaele 2009                 | #10579  | Fesoterodine   | All enrolled subjects were treated for 4 weeks with fesoterodine 4 mg qd, taken in the morning. At week 4, dosage could either be maintained at fesoterodine 4 mg qd or increased to 8 mg qd for the remaining 8 weeks of the study.                                                                                                   | 12 wks                |
| Chapple 2007b                 | #10668  | Fesoterodine   | 4 mg once daily in the morning                                                                                                                                                                                                                                                                                                         | 12 wks                |
| Chapple 2007b                 | #10668  | Fesoterodine   | 8 mg once daily in the morning                                                                                                                                                                                                                                                                                                         | 12 wks                |
| Kaplan 2011                   | #11473  | Fesoterodine   | 4mg for the first week followed by fesoterodine 8 mg for the next 11 weeks                                                                                                                                                                                                                                                             | 12 wks                |
| Herschorn 2010                | #11509  | Fesoterodine   | 8mg                                                                                                                                                                                                                                                                                                                                    | 12 wks                |
| Chapple 2014                  | #15555  | Fesoterodine   | 4mg                                                                                                                                                                                                                                                                                                                                    | 12 wks                |
| Chapple 2014                  | #15555  | Fesoterodine   | 8mg                                                                                                                                                                                                                                                                                                                                    | 12 wks                |
| Anderson 2006                 | #11120  | Oxybutynine    | extended release 10 mg; no prior anticholinergic therapy                                                                                                                                                                                                                                                                               | 12 wks                |
| Anderson 2006                 | #11120  | Oxybutynine    | extended release 10 mg; prior anticholinergic therapy                                                                                                                                                                                                                                                                                  | 12 wks                |
| Janssen Korea 2013            | #14046  | Oxybutynin     | Starting dose of 10mg orally once daily. Maximum allowed dose will be 30 mg per day.                                                                                                                                                                                                                                                   | 12 wks                |
| Visco 2012                    | #15547  | Solifenacin    | Initiated treatment with solifenacin at a dose of 5 mg daily. Dose escalation was allowed at months 2 and 4 if adequate control of symptoms. With dose escalation at month 2, the dose of solifenacin was increased to 10 mg; if inadequate control of symptoms continued at month 4, the drug was changed to trospium XR at a dose of | 6 months              |



|                  |        |                     |                                                                                                                                                                                                                                                                                              |           |
|------------------|--------|---------------------|----------------------------------------------------------------------------------------------------------------------------------------------------------------------------------------------------------------------------------------------------------------------------------------------|-----------|
|                  |        |                     | 60 mg.                                                                                                                                                                                                                                                                                       |           |
| Staskin 2006     | #11558 | Solifenacin         | 5 mg or 10 mg once daily                                                                                                                                                                                                                                                                     | 40-52 wks |
| Karram 2009      | #10655 | Solifenacin         | Solifenacin 5 mg for the first 4 weeks. At week 4, dose could be maintained at 5 mg or increased to 10 mg. At week 8, dose could be maintained, increased from 5 to 10 mg, or decreased from 10 to 5 mg.                                                                                     | 12 wks    |
| Chapple 2005     | #11576 | Solifenacin         | 5 mg OD, after 4 wks allowed to increase to 10 mg                                                                                                                                                                                                                                            | 12 wks    |
| Yamaguchi 2007   | #11732 | Solifenacin         | 5mg once daily                                                                                                                                                                                                                                                                               | 12 wks    |
| Yamaguchi 2007   | #11732 | Solifenacin         | 10mg once daily                                                                                                                                                                                                                                                                              | 12 wks    |
| NCT00090584 2013 | #13577 | Tolterodine         | 4mg/d for 10 weeks. Could be reduced to 2mg/d for managing side effects.                                                                                                                                                                                                                     | 10 wks    |
| Rogers 2009      | #11496 | Tolterodine         | tolterodine ER 4 mg, once daily within 4 h of bedtime                                                                                                                                                                                                                                        | 24 wks    |
| Chapple 2013     | #11434 | Tolterodine ER 4 mg | 4 mg once daily                                                                                                                                                                                                                                                                              | 12 months |
| Chapple 2007b    | #10668 | Tolterodine ER      | once daily in the morning                                                                                                                                                                                                                                                                    | 12 wks    |
| Anderson 2006    | #11120 | Tolterodine         | extended release 4 mg; no prior anticholinergic therapy                                                                                                                                                                                                                                      | 12 wks    |
| Anderson 2006    | #11120 | Tolterodine         | extended release 4 mg; prior anticholinergic therapy                                                                                                                                                                                                                                         | 12 wks    |
| Kaplan 2011      | #11473 | Tolterodine ER      | 4 mg                                                                                                                                                                                                                                                                                         | 12 wks    |
| Herschorn 2010   | #11509 | Tolterodine ER      | 4mg                                                                                                                                                                                                                                                                                          | 12 wks    |
| Chapple 2005     | #11576 | Tolterodine ER      | 4 mg OD                                                                                                                                                                                                                                                                                      | 12 wks    |
| NCT00090584 2013 | #13577 | Tolterodine+ PFMT   | 4mg/d for 10 weeks. Could be reduced to 2mg/d for managing side effects and training in pelvic floor muscle control and exercises; behavioural strategies to diminish urgency, suppress bladder contractions and prevent incontinence; delayed voiding; and individualized fluid management. | 10 wks    |
| Dmochowski 2008  | #10812 | Trospium            | 60 mg QD oral capsules                                                                                                                                                                                                                                                                       | 12 wks    |
| Staskin 2007     | #15553 | Trospium            | 60 mg QD                                                                                                                                                                                                                                                                                     | 12 wks    |

| <b>Women – Adrenergic</b>      |        |                                                                            |                                                                                                                                                                                                                                                                         |                  |
|--------------------------------|--------|----------------------------------------------------------------------------|-------------------------------------------------------------------------------------------------------------------------------------------------------------------------------------------------------------------------------------------------------------------------|------------------|
| Chapple 2013                   | #11434 | Mirabegron 50 mg                                                           | 50 mg once daily                                                                                                                                                                                                                                                        | 12 months        |
| Chapple 2013                   | #11434 | Mirabegron 100 mg                                                          | 100 mg once daily                                                                                                                                                                                                                                                       | 12 months        |
| Herschorn 2013                 | #15552 | Mirabegron 25 mg                                                           | 25 mg once daily                                                                                                                                                                                                                                                        | 12 wks           |
| Herschorn 2013                 | #15552 | Mirabegron 50 mg                                                           | 50 mg once daily                                                                                                                                                                                                                                                        | 12 wks           |
| <b>Women – Neuromodulation</b> |        |                                                                            |                                                                                                                                                                                                                                                                         |                  |
| Amundsen 2005                  | #4293  | Sacral neuromodulation                                                     | None provided                                                                                                                                                                                                                                                           | 29 months        |
| Siegel 2015                    | #4552  | SNM                                                                        | For SNM InterStim1 Therapy systema which required 14 day test stimulation period. If $\geq$ 50% improvement from baseline in average leaks/day or voids/day or a return to normal voiding ( $<$ 8 voids/day)] implantation according to previously described procedure. | 6 months         |
| Groen 2011                     | #2358  | Sacral neuromodulation                                                     | All leads were implanted via a small mid sacral incision. An INS was placed abdominally in most of the earlier cases and at the buttock site in later cases. Postoperatively the lead position was assessed radiologically.                                             | Surgery (NR)     |
| Surwitt 2009                   | #10558 | Neuromodulation+ PFMRehabilitation (training, biofeedback and stimulation) | percutaneous tibial nerve neuromodulation (Urgent PC, Uroplasty Inc., Minneapolis, MN, USA) and pelvic floor muscle rehabilitation (Evadri System, Hollister Inc., Libertyville, IL, USA)                                                                               | NR               |
| <b>Women – TVT</b>             |        |                                                                            |                                                                                                                                                                                                                                                                         |                  |
| Ducket 2006                    | #4217  | TVT                                                                        | The TVT procedure was performed as described by Ulmsten et al. and spinal anaesthesia was used.                                                                                                                                                                         | Surgery (NR)     |
| <b>Women – Botulinum toxin</b> |        |                                                                            |                                                                                                                                                                                                                                                                         |                  |
| Tincello 2012                  | #11438 | Botulinum toxin                                                            | 200 IU of onaBoNTA injected in 20 sites                                                                                                                                                                                                                                 | Single procedure |
| Liao 2013                      | #15559 | Botulinum toxin                                                            | OnabotulinumtoxinA 100U                                                                                                                                                                                                                                                 | Single procedure |
| Sand 2012                      | #6213  | OnabotulinumtoxinA                                                         | OnabotulinumtoxinA 100 U administered cystoscopically as 20 intradetrusor                                                                                                                                                                                               | Single           |

|                                              |        |                             |                                                                                                                                                                                                                                                                                                                                                                                                                                                                                                              |                  |
|----------------------------------------------|--------|-----------------------------|--------------------------------------------------------------------------------------------------------------------------------------------------------------------------------------------------------------------------------------------------------------------------------------------------------------------------------------------------------------------------------------------------------------------------------------------------------------------------------------------------------------|------------------|
|                                              |        |                             | injections of 0.5 mL, sparing the trigone                                                                                                                                                                                                                                                                                                                                                                                                                                                                    | procedure        |
| Nitti 2013                                   | #9683  | OnabotulinumtoxinA          | 100 U (Botox®) reconstituted with 10 ml normal saline or placebo (10 ml normal saline)                                                                                                                                                                                                                                                                                                                                                                                                                       | Single procedure |
| Rovner 2011                                  | #11452 | OnabotulinumtoxinA 50U      | 50 U; Treatment was administered via flexible or rigid cystoscope under local anaesthesia (with or without sedation as per local practice) as 20 intradetrusor injections of 0.5 ml, avoiding the trigone and dome.                                                                                                                                                                                                                                                                                          | Single procedure |
| Rovner 2011                                  | #11452 | OnabotulinumtoxinA 100U     | 100U; Same                                                                                                                                                                                                                                                                                                                                                                                                                                                                                                   | Single procedure |
| Rovner 2011                                  | #11452 | OnabotulinumtoxinA 150 U    | 150U; Same                                                                                                                                                                                                                                                                                                                                                                                                                                                                                                   | Single procedure |
| Rovner 2011                                  | #11452 | OnabotulinumtoxinA 200U     | 200U; Same                                                                                                                                                                                                                                                                                                                                                                                                                                                                                                   | Single procedure |
| Rovner 2011                                  | #11452 | OnabotulinumtoxinA 300 U    | 300U; Same                                                                                                                                                                                                                                                                                                                                                                                                                                                                                                   | Single procedure |
| <b>MEN</b>                                   |        |                             |                                                                                                                                                                                                                                                                                                                                                                                                                                                                                                              |                  |
| <b>Men – Antimuscarinic</b>                  |        |                             |                                                                                                                                                                                                                                                                                                                                                                                                                                                                                                              |                  |
| Drake 2015                                   | #15546 | Solifenacin and Tamsulosin  | One fixed dose combination tablet per day, starting with 4 wk of Soli 6 mg plus Tamsulosin (oral controlled absorption system formulation - TOCAS) 0.4 mg (6 mg FDC) followed by either 6 mg FDC or Soli 9 mg plus TOCAS (9 mg FDC)                                                                                                                                                                                                                                                                          | 52 wks           |
| <b>MEN - PFMT (Supervised)</b>               |        |                             |                                                                                                                                                                                                                                                                                                                                                                                                                                                                                                              |                  |
| Glazener 2011                                | #847   | PFMT (after RP)             | Four one-to-one sessions held over 3 months with a therapist and received a supplementary MAPS pelvic-floor exercise leaflet, aimed at establishing a home exercise regimen. The therapists were either specialist continence physiotherapists or specialist continence or urology nurses                                                                                                                                                                                                                    | 3m               |
| Glazener 2011                                | #847   | PFMT (after TURP)           | Four one-to-one sessions held over 3 months – Same as above                                                                                                                                                                                                                                                                                                                                                                                                                                                  | 3m               |
| <b>MEN - Lifestyle Advice (Unsupervised)</b> |        |                             |                                                                                                                                                                                                                                                                                                                                                                                                                                                                                                              |                  |
| Glazener 2011                                | #847   | Lifestyle advice (after RP) | Lifestyle advice leaflet that described the influence of fluid intake, caffeine, diet, constipation, fitness, lifting, chest problems, and urinary tract infections on continence. No information was provided in the leaflet about pelvic-floor exercises or techniques for dealing with urgency symptoms. Men having radical prostatectomy are commonly told about pelvic-floor exercises by health-care professionals and information is also widely available in the public domain—eg, via the internet. | 3m               |

|               |      |                                  |                                          |    |
|---------------|------|----------------------------------|------------------------------------------|----|
| Glazener 2011 | #847 | Lifestyle advice<br>(after TURP) | Lifestyle advice leaflet – Same as above | 3m |
|---------------|------|----------------------------------|------------------------------------------|----|

Table S8: Results of interventions for patients with UUI

| Study name                    | Endnote | Intervention               | N   | Follow-up period | Type of outcome                   | Outcome description                                                                                                                                                 | With or without containment products | % of patients with outcome |
|-------------------------------|---------|----------------------------|-----|------------------|-----------------------------------|---------------------------------------------------------------------------------------------------------------------------------------------------------------------|--------------------------------------|----------------------------|
| <b>WOMEN</b>                  |         |                            |     |                  |                                   |                                                                                                                                                                     |                                      |                            |
| <b>Women – Antimuscarinic</b> |         |                            |     |                  |                                   |                                                                                                                                                                     |                                      |                            |
| Siegel 2015                   | #4552   | Antimuscarinic             | 77  | 6 mo             | OAB therapeutic success rate      | a 50% improvement in average leaks/day or voids/day from baseline or a return to normal voiding frequency (<8 voids/day)                                            | NR                                   | 42%                        |
| Siegel 2015                   | #4552   | Antimuscarinic             | 77  | 6 mo             | OAB therapeutic success rate      | Complete continence                                                                                                                                                 | NR                                   | 21%                        |
| Siegel 2015                   | #4552   | Antimuscarinic             | 74  | 6 mo             | QoL- Urinary symptom interference | International Consultation on Incontinence improved or greatly improved Modular Questionnaire (ICIQ)-OABqol including a single item on urinary symptom interference | NR                                   | 44%                        |
| Haab 2006                     | #11577  | Antimuscarinic-darifenacin | 600 | 3mo              | Improvement - responder 50%       | reductions of ≥ 50%, from feeder-study baseline in incontinence episodes/week                                                                                       | NR                                   | 76%                        |
| Haab 2006                     | #11577  | Antimuscarinic-darifenacin | 543 | 6mo              | Improvement - responder 50%       | Same as above                                                                                                                                                       | NR                                   | 78%                        |
| Haab 2006                     | #11577  | Antimuscarinic-darifenacin | 497 | 12mo             | Improvement - responder 50%       | Same as above                                                                                                                                                       | NR                                   | 79%                        |
| Haab 2006                     | #11577  | Antimuscarinic-darifenacin | 466 | 24 mo            | Improvement - responder 50%       | Same as above                                                                                                                                                       | NR                                   | 76%                        |

| Study name    | Endnote | Intervention               | N   | Follow-up period | Type of outcome             | Outcome description                                                                | With or without containment products | % of patients with outcome |
|---------------|---------|----------------------------|-----|------------------|-----------------------------|------------------------------------------------------------------------------------|--------------------------------------|----------------------------|
| Haab 2006     | #11577  | Antimuscarinic-darifenacin | 600 | 3 mo             | Improvement - responder 70% | reductions of $\geq 70\%$ from feeder-study baseline in incontinence episodes/week | NR                                   | 59%                        |
| Haab 2006     | #11577  | Antimuscarinic-darifenacin | 543 | 6mo              | Improvement - responder 70% | Same as above                                                                      | NR                                   | 61.5%                      |
| Haab 2006     | #11577  | Antimuscarinic-darifenacin | 497 | 12 mo            | Improvement - responder 70% | Same as above                                                                      | NR                                   | 65%                        |
| Haab 2006     | #11577  | Antimuscarinic-darifenacin | 466 | 24 mo            | Improvement - responder 70% | Same as above                                                                      | NR                                   | 62.3%                      |
| Haab 2006     | #11577  | Antimuscarinic-darifenacin | 600 | 3mo              | Improvement - responder 90% | reductions of $\geq 90\%$ from feeder-study baseline in incontinence episodes/week | NR                                   | 38%                        |
| Haab 2006     | #11577  | Antimuscarinic-darifenacin | 543 | 6mo              | Improvement - responder 90% | Same as above                                                                      | NR                                   | 41%                        |
| Haab 2006     | #11577  | Antimuscarinic-darifenacin | 497 | 12mo             | Improvement - responder 90% | Same as above                                                                      | NR                                   | 42%                        |
| Haab 2006     | #11577  | Antimuscarinic-darifenacin | 466 | 24mo             | Improvement - responder 90% | Same as above                                                                      | NR                                   | 43.8%                      |
| Staskin 2011  | #10091  | Fesoterodine               | 168 | 12 wks           | Cure                        | 3-Day Diary-Dry rate                                                               | Without                              | 63%                        |
| Wyndaele 2009 | #10579  | Fesoterodine               | 463 | 12 wks           | Improvement TSQ treatment   | Somewhat satisfied or very satisfied                                               | Without                              | 79.8%                      |

| Study name     | Endnote | Intervention      | N   | Follow-up period | Type of outcome                        | Outcome description                                                      | With or without containment products | % of patients with outcome |
|----------------|---------|-------------------|-----|------------------|----------------------------------------|--------------------------------------------------------------------------|--------------------------------------|----------------------------|
|                |         |                   |     |                  | satisfaction                           |                                                                          |                                      |                            |
| Wyndaele 2009  | #10579  | Fesoterodine      | 463 | 12 wks           | Improvement TSQ treatment satisfaction | Very satisfied                                                           | Without                              | 38.4%                      |
| Wyndaele 2009  | #10579  | Fesoterodine      | 463 | 12 wks           | Improvement PPBC                       | Improvement                                                              | Without                              | 83%                        |
| Wyndaele 2009  | #10579  | Fesoterodine      | 463 | 12 wks           | Improvement PPBC                       | Improvement >=2 points in PPBC                                           | Without                              | 59%                        |
| Chapple 2007b  | #10668  | Fesoterodine 4 mg | 265 | 12 wks           | Improvement                            | Greatly improved or improved on 4-point scale                            | Without                              | 75%                        |
| Chapple 2007b  | #10668  | Fesoterodine 8 mg | 276 | 12 wks           | Improvement                            | Greatly improved or improved on 4-point scale                            | Without                              | 79%                        |
| Chapple 2007b  | #10738  | Fesoterodine 8 mg | 232 | 12 wks           | Improvement                            | Greatly improved or improved on 4-point scale                            | Without                              | 82%                        |
| Kaplan 2011    | #11473  | Fesoterodine      | 908 | 12 wks           | Cure                                   | Dry rate - no UUI episodes in 3 day diary in patients with UUI at b-line | Without                              | 62%                        |
| Herschorn 2010 | #11509  | Fesoterodine      | 619 | 12 wks           | Cure                                   | Diary dry rate                                                           | Without                              | 0.64                       |
| Herschorn 2010 | #11509  | Fesoterodine      | 636 | 12 wks           | Improvement                            | Improvement on UPS score                                                 | NR                                   | 0.46                       |
| Chapple 2014   | # 15555 | Fesoterodine 4 mg | 790 | 12 wks           | Cure                                   | Diary dry rate                                                           | Without                              | 49.2%                      |
| Chapple 2014   | # 15555 | Fesoterodine 8 mg | 779 | 12 wks           | Cure                                   | Diary dry rate                                                           | Without                              | 57.8%                      |
| Chapple 2014   | # 15555 | Fesoterodine 4 mg | 700 | 12 wks           | Improvement                            | Improvement in Urgency Perception Scale                                  | Without                              | 43%                        |
| Chapple 2014   | # 15555 | Fesoterodine 8 mg | 677 | 12 wks           | Improvement                            | Improvement in Urgency Perception Scale                                  | Without                              | 50.5%                      |

| Study name         | Endnote | Intervention           | N   | Follow-up period | Type of outcome           | Outcome description                                                                                                                                                                                              | With or without containment products | % of patients with outcome |
|--------------------|---------|------------------------|-----|------------------|---------------------------|------------------------------------------------------------------------------------------------------------------------------------------------------------------------------------------------------------------|--------------------------------------|----------------------------|
| Anderson 2006      | #11120  | Oxybutynine, prior     | 163 | 12 wks           | Cure                      | No UUI episodes                                                                                                                                                                                                  | Without                              | 25.2%                      |
| Anderson 2006      | #11120  | Oxybutynine, prior     | 163 | 12 wks           | Cure                      | No incontinence episodes of any type                                                                                                                                                                             | Without                              | 20%                        |
| Janssen Korea 2013 | #14046  | Oxybutynin             | 276 | 12 wks           | Improvement               | Number of Participants With Change From Baseline in Response to Primary Overactive Bladder (OAB) Symptom Questionnaire (POSQ): Baseline strongly or very strongly and Week 12 Not bothered or slightly bothered. | Without                              | 24.6%                      |
| Janssen Korea 2013 | #14046  | Oxybutynin             | 277 | 12 wks           | Improvement: Benefit      | Strong benefit from treatment at 12 weeks                                                                                                                                                                        | Without                              | 45.8%                      |
| Janssen Korea 2013 | #14046  | Oxybutynin             | 277 | 12 wks           | Improvement: Satisfaction | Very satisfactory treatment at 12 weeks                                                                                                                                                                          | Without                              | 31.4%                      |
| Visco 2012         | #15547  | Solifenacin            | 119 | 6 mo             | Cure Urgency              | Complete resolution of urgency urinary incontinence                                                                                                                                                              | NR                                   | 13%                        |
| Visco 2012         | #15547  | Solifenacin            | 119 | 6 mo             | Cure any incontinence     | Complete resolution of all incontinence                                                                                                                                                                          | NR                                   | 11%                        |
| Visco 2012         | #15547  | Solifenacin            | 119 | 6 mo             | Improvement diary         | >75% reduction in episodes of urgency urinary incontinence                                                                                                                                                       | NR                                   | 40%                        |
| Visco 2012         | #15547  | Solifenacin            | 116 | 3 mo             | Improvement PGI-I         | Very much or much improved                                                                                                                                                                                       | NR                                   | 51%                        |
| Visco 2012         | #15547  | Solifenacin            | 116 | 6 mo             | Improvement PGI-I         | Very much or much improved                                                                                                                                                                                       | NR                                   | 58%                        |
| Staskin 2006       | #11558  | Solifenacin 5 or 10 mg | 535 | 40 to 52 wks     | Cure                      | Achieved continence                                                                                                                                                                                              | NR                                   | 58%                        |
| Staskin 2006       | #11558  | Solifenacin 5 or 10 mg | 397 | 40 to 52 wks     | Cure                      | Achieved continence                                                                                                                                                                                              | NR                                   | 60%                        |
| Staskin 2006       | #11558  | Solifenacin 5 or 10    | 925 | 44 wks           | Improvement               | Satisfactory improvement (efficacy)                                                                                                                                                                              | NR                                   | 68%                        |



| Study name       | Endnote | Intervention           | N   | Follow-up period | Type of outcome                              | Outcome description                                                                                                                                                                                      | With or without containment products | % of patients with outcome |
|------------------|---------|------------------------|-----|------------------|----------------------------------------------|----------------------------------------------------------------------------------------------------------------------------------------------------------------------------------------------------------|--------------------------------------|----------------------------|
|                  |         | mg                     |     |                  |                                              |                                                                                                                                                                                                          |                                      |                            |
| Staskin 2006     | #11558  | Solifenacin 5 or 10 mg | 925 | 68 wks           | Improvement                                  | Satisfactory improvement (efficacy)                                                                                                                                                                      | NR                                   | 74%                        |
| Karram 2009      | #10655  | Solifenacin            | 229 | 12 wks           | Cure                                         | Proportion of incontinent patients who reported no episodes of incontinence at the end of study.                                                                                                         | Without                              | 58%                        |
| Chapple 2005     | #11576  | Solifenacin            | NR  | 12 wks           | Cure                                         | Continent (in those incontinent at b-line)                                                                                                                                                               | Without                              | 59%                        |
| Chapple 2005     | #11576  | Solifenacin            | NR  | 12 wks           | Improvement (in those incontinent at b-line) | Reduction of at least 50% in their incontinence episodes by the end of the study                                                                                                                         | Without                              | 74%                        |
| Yamaguchi 2007   | #11732  | Solifenacin 5mg        | 274 | 12 wks           | Cure                                         | Continent at endpoint                                                                                                                                                                                    | Without                              | 56.2%                      |
| Yamaguchi 2007   | #11732  | Solifenacin 10mg       | 270 | 12 wks           | Cure                                         | Continent at endpoint                                                                                                                                                                                    | Without                              | 59.6%                      |
| NCT00090584 2013 | #13577  | Tolterodine            | 119 | 8 m              | Success                                      | Not taking drug or receiving other urge UI therapy and not taking a tricyclic antidepressant or duloxetine at 8 months; and a >70% reduction in number of incontinence episodes as compared to baseline. | NR                                   | 41/119 (34.5%)             |
| NCT00090584 2013 | #13577  | Tolterodine            | 119 | 8 m              | Improvement                                  | Symptom Improvement defined as the number of women who responded "much better" or "better" to question: "Overall, do you feel that you are much better, better, about the same, worse or much worse?"    | NR                                   | 54/125 (43.2%)             |

| Study name       | Endnote | Intervention        | N   | Follow-up period | Type of outcome                              | Outcome description                                                                       | With or without containment products | % of patients with outcome |
|------------------|---------|---------------------|-----|------------------|----------------------------------------------|-------------------------------------------------------------------------------------------|--------------------------------------|----------------------------|
| Rogers 2009      | #11496  | Tolterodine         | 161 | 24 wks           | Cure                                         | No UUI in 5-day diaries                                                                   | NR                                   | 70%                        |
| Chapple 2013     | #11434  | Tolterodine ER 4 mg | 791 | 12mo             | Improvement                                  | More than 50% decrease from baseline in the mean number of incontinence episodes per 24 h | NR                                   | 66.8%                      |
| Chapple 2013     | #11434  | Tolterodine ER 4 mg | 791 | 12mo             | Cure                                         | No incontinence episodes (Dry)                                                            | NR                                   | 45.1%                      |
| Chapple 2007b    | #10668  | Tolterodine ER      | 283 | 12 wks           | Improvement                                  | Greatly improved or improved on 4-point scale                                             | Without                              | 72%                        |
| Chapple 2007b    | #10738  | Tolterodine ER      | 229 | 12 wks           | Improvement                                  | Greatly improved or improved on 4-point scale                                             | Without                              | 70%                        |
| Anderson 2006    | #11120  | Tolterodine, prior  | 177 | 12 wks           | Cure                                         | No UUI episodes                                                                           | Without                              | 16.4%                      |
| Anderson 2006    | #11120  | Tolterodine, prior  | 177 | 12 wks           | Cure                                         | No incontinence episodes of any type                                                      | Without                              | 13%                        |
| Kaplan 2011      | #11473  | Tolterodine ER      | 926 | 12 wks           | Cure                                         | Dry rate - no UUI episodes in 3 day diary in patientw tih UUI at b-line                   | Without                              | 56%                        |
| Herschorn 2010   | #11509  | Tolterodine         | 626 | 12 wks           | Cure                                         | Diary dry rate                                                                            | Without                              | 57.2%                      |
| Herschorn 2010   | #11509  | Tolterodine         | 641 | 12 wks           | Improvement                                  | Improvement on UPS score                                                                  | NR                                   | 0.4                        |
| Chapple 2005     | #11576  | Tolterodine ER      | NR  | 12 wks           | Cure                                         | Continent (in those incontinent at b-line)                                                | Without                              | 49%                        |
| Chapple 2005     | #11576  | Tolterodine ER      | NR  | 12 wks           | Improvement (in those incontinent at b-line) | Reduction of at least 50% in their incontinence episodes by the end of the study          | Without                              | 67%                        |
| NCT00090584 2013 | #13577  | Tolterodine+ PFMT   | 118 | 8 m              | Success                                      | Same as above                                                                             | NR                                   | 43/118 (36.4%)             |
| NCT00090584 2013 | #13577  | Tolterodine+ PFMT   | 118 | 8 m              | Improvement                                  | Same as above                                                                             | NR                                   | 80/166 (69%)               |

| Study name                     | Endnote | Intervention           | N   | Follow-up period | Type of outcome              | Outcome description                                                                                                      | With or without containment products | % of patients with outcome |
|--------------------------------|---------|------------------------|-----|------------------|------------------------------|--------------------------------------------------------------------------------------------------------------------------|--------------------------------------|----------------------------|
| Dmochowski 2008                | #10812  | Triospium              | 267 | 12 wks           | Cure                         | Dry rate - no UUI episodes in 3 day diary                                                                                | Without                              | 35.6%                      |
| Staskin 2007                   | #15553  | Triospium              | 292 | 12 wks           | Normalization (Cure)         | No UUI episodes and voiding frequency of 8 or fewer voids per day                                                        | Without                              | 20.5%                      |
| <b>Women – Adrenergic</b>      |         |                        |     |                  |                              |                                                                                                                          |                                      |                            |
| Chapple 2013                   | #11434  | Mirabegron 50 mg       | 789 | 12mo             | Cure                         | No incontinence episodes (Dry)                                                                                           | NR                                   | 43.4%                      |
| Chapple 2013                   | #11434  | Mirabegron 100 mg      | 802 | 12mo             | Cure                         | No incontinence episodes (Dry)                                                                                           | NR                                   | 45.8%                      |
| Chapple 2013                   | #11434  | Mirabegron 50 mg       | 789 | 12mo             | Improvement                  | More than 50% decrease from baseline in the mean number of incontinence episodes per 24 h                                | NR                                   | 63.7%                      |
| Chapple 2013                   | #11434  | Mirabegron 100 mg      | 802 | 12mo             | Improvement                  | More than 50% decrease from baseline in the mean number of incontinence episodes per 24 h                                | NR                                   | 66.3%                      |
| Herschorn 2013                 | #15552  | Mirabegron 50 mg       | 257 | 12 wks           | Cure                         | No Incontinence episodes - 100% dry rate in 3-day diary                                                                  | Without                              | 47.1%                      |
| Herschorn 2013                 | #15552  | Mirabegron 25 mg       | 254 | 12 wks           | Improvement                  | ≥ 50% reduction in incontinence episodese in 3-day diary                                                                 | Without                              | 72.8%                      |
| Herschorn 2013                 | #15552  | Mirabegron 50 mg       | 257 | 12 wks           | Improvement                  | ≥ 50% reduction in incontinence episodese in 3-day diary                                                                 | Without                              | 70%                        |
| <b>Women – Neuromodulation</b> |         |                        |     |                  |                              |                                                                                                                          |                                      |                            |
| Amundsen 2005                  | #4293   | Sacral neuromodulation | 55  | 29 mo            | Subjective                   | No daily leakage on diary                                                                                                | NR                                   | 45.5%                      |
| Siegel 2015                    | #4552   | SNM                    | 70  | 6 mo             | OAB therapeutic success rate | A 50% improvement in average leaks/day or voids/day from baseline or a return to normal voiding frequency (<8 voids/day) | NR                                   | 61%                        |
| Siegel 2015                    | #4552   | SNM                    | 70  | 6 mo             | OAB                          | Complete continence                                                                                                      | NR                                   | 39%                        |

| Study name   | Endnote | Intervention           | N   | Follow-up period | Type of outcome                   | Outcome description                                                                                                                                                 | With or without containment products | % of patients with outcome |
|--------------|---------|------------------------|-----|------------------|-----------------------------------|---------------------------------------------------------------------------------------------------------------------------------------------------------------------|--------------------------------------|----------------------------|
|              |         |                        |     |                  | therapeutic success rate          |                                                                                                                                                                     |                                      |                            |
| Siegel 2015  | #4552   | SNM                    | 51  | 6 mo             | QoL- Urinary symptom interference | International Consultation on Incontinence improved or greatly improved Modular Questionnaire (ICIQ)-OABqol including a single item on urinary symptom interference | NR                                   | 86%                        |
| Groen 2011   | #2358   | Sacral neuromodulation | 60  | 5y               | Cure                              | Complete continence                                                                                                                                                 | Without                              | 15                         |
| Groen 2011   | #2358   | Sacral neuromodulation | 60  | 5y               | Success rate                      | Decrease of at least 50% in the number of incontinence episodes or pads used daily                                                                                  | With                                 | 30                         |
| Groen 2011   | #2358   | Sacral neuromodulation | 60  | 5y               | Excellent response                | Decrease of at least 90% in the number of incontinence episodes or pads used daily                                                                                  | With                                 | 32                         |
| Groen 2011   | #2358   | Sacral neuromodulation | 41  | 10y              | Cure                              | Complete continence                                                                                                                                                 | Without                              | 17                         |
| Groen 2011   | #2358   | Sacral neuromodulation | 41  | 10y              | Success rate                      | Decrease of at least 50% in the number of incontinence episodes or pads used daily                                                                                  | With                                 | 37                         |
| Groen 2011   | #2358   | Sacral neuromodulation | 41  | 10y              | Excellent response                | Decrease of at least 90% in the number of incontinence episodes or pads used daily                                                                                  | With                                 | 29                         |
| Surwitt 2009 | #10558  | PFMR+Neuromodulation   | 256 | 3mo              | Success                           | An absence of incontinent episodes (dry) and an OAB-V8 score <8, indicating no OAB                                                                                  | NR                                   | 93%                        |
| Surwitt 2009 | #10558  | PFMR+Neuromodulation   | 256 | 3 mo             | Improvement                       | Improvement in incontinence episodes                                                                                                                                | NR                                   | 7%                         |

| Study name                     | Endnote | Intervention           | N   | Follow-up period | Type of outcome            | Outcome description                                                                                    | With or without containment products | % of patients with outcome |
|--------------------------------|---------|------------------------|-----|------------------|----------------------------|--------------------------------------------------------------------------------------------------------|--------------------------------------|----------------------------|
| Surwitt 2009                   | #10558  | PFMR+Neuromodulation   | 133 | 3mo              | Success                    | An absence of incontinent episodes (dry) and an OAB-V8 score <8, indicating no OAB                     | NR                                   | 94%                        |
| <b>Women – TVT</b>             |         |                        |     |                  |                            |                                                                                                        |                                      |                            |
| Duckett 2006                   | #4217   | TVT                    | 46  | 6m               | Objective cure             | Normal detrusor function during filling cystometry                                                     | NR                                   | 92%                        |
| Duckett 2006                   | #4217   | TVT                    | 46  | 6m               | Subjective cure            | Information from interview and questionnaire                                                           | NR                                   | 91%                        |
| <b>Women – Botulinum toxin</b> |         |                        |     |                  |                            |                                                                                                        |                                      |                            |
| Tincello 2012                  | #11438  | Botulinum toxin        | 86  | 3mo              | Cure                       | Continent on 3 day diary                                                                               | NR                                   | 35%                        |
| Tincello 2012                  | #11438  | Botulinum toxin        | 100 | 6 mo             | Cure                       | Continent on 3 day diary                                                                               | NR                                   | 31.3%                      |
| Liao 2013                      | #15559  | OnabotulinumtoxinA     | 42  | 3m               | Success                    | Success rate- A Patient Perception of Bladder Condition decrease of 2 points was considered successful | Without                              | 88.9%                      |
| Liao 2013                      | #15559  | OnabotulinumtoxinA     | 42  | 6m               | Success                    | Same as above                                                                                          | Without                              | 49.4%                      |
| Liao 2013                      | #15559  | OnabotulinumtoxinA     | 42  | 12m              | Success                    | Same as above                                                                                          | Without                              | 23.1%                      |
| Sand 2012                      | #6213   | OnabotulinumtoxinA     | 280 | 12 wks           | Improvement                | Improvement in Incontinence quality of life (IQoL) total summary scores                                | Without                              | 60.2%                      |
| Nitti 2013                     | #9683   | OnabotulinumtoxinA     | 280 | 12 wks           | Cure                       | Continent - 100% reduction in UI episodes                                                              | NR                                   | 22.9%                      |
| Nitti 2013                     | #9683   | OnabotulinumtoxinA     | 280 | 12 wks           | Improvement in UI episodes | ≥50% reduction in UI episodes                                                                          | NR                                   | 57.5%                      |
| Nitti 2013                     | #9683   | OnabotulinumtoxinA     | 280 | 12 wks           | Improvement TBS            | Greatly improved or improved on Treatment Benefit Scale                                                | NR                                   | 60.8%                      |
| Rovner 2011                    | #11452  | OnabotulinumtoxinA 50U | 57  | 12 wks           | Cure self report           | No UUI episodes on diary (incontinence-free)                                                           | NR                                   | 15.9%                      |
| Rovner 2011                    | #11452  | OnabotulinumtoxinA     | 54  | 12 wks           | Cure self                  | No UUI episodes on                                                                                     | NR                                   | 29.8%                      |

| Study name                     | Endnote | Intervention               | N    | Follow-up period | Type of outcome        | Outcome description                                                                                                                                         | With or without containment products | % of patients with outcome |
|--------------------------------|---------|----------------------------|------|------------------|------------------------|-------------------------------------------------------------------------------------------------------------------------------------------------------------|--------------------------------------|----------------------------|
|                                |         | 100U                       |      |                  | report                 | diary (incontinence-free)                                                                                                                                   |                                      |                            |
| Rovner 2011                    | #11452  | OnabotulinumtoxinA 150 U   | 49   | 12 wks           | Cure self report       | No UUI episodes on diary (incontinence-free)                                                                                                                | NR                                   | 37.0%                      |
| Rovner 2011                    | #11452  | OnabotulinumtoxinA 200U    | 53   | 12 wks           | Cure self report       | No UUI episodes on diary (incontinence-free)                                                                                                                | NR                                   | 40.8%                      |
| Rovner 2011                    | #11452  | OnabotulinumtoxinA 300 U   | 56   | 12 wks           | Cure self report       | No UUI episodes on diary (incontinence-free)                                                                                                                | NR                                   | 50.9%                      |
| Rovner 2011                    | #9646   | OnabotulinumtoxinA         | 277  | 12 wks           | Subjective improvement | Treatment benefit scale according to the patients greatly improved or improved                                                                              | Without                              | 62.8%                      |
| <b>MEN</b>                     |         |                            |      |                  |                        |                                                                                                                                                             |                                      |                            |
| <b>Men – Antimuscarinic</b>    |         |                            |      |                  |                        |                                                                                                                                                             |                                      |                            |
| Drake 2015                     | #15546  | Solifenacin and Tamsulosin | 1004 | 12 mo            | Improvement            | IPSS QoI ≤3                                                                                                                                                 | NR                                   | 85.3%                      |
| Drake 2015                     | #15546  | Solifenacin and Tamsulosin | 1009 | 12 mo            | Improvement            | Patients satisfied with efficacy                                                                                                                            | NR                                   | 82.9%                      |
| <b>Men – PFMT (Supervised)</b> |         |                            |      |                  |                        |                                                                                                                                                             |                                      |                            |
| Glazener 2011                  | #847    | PFMT (after RP)            | 196  | 12m              | Cure                   | No incontinence - no positive response to either “how often do you leak urine?” or “how much urine do you usually leak (whether you wear protection or not) | NR                                   | 24%                        |
| Glazener 2011                  | #847    | PFMT (after TURP)          | 194  | 12m              | Cure                   | No incontinence - no positive response to either “how often do you leak urine?” or “how much urine do you usually leak (whether you wear protection or not) | NR                                   | 35%                        |

| Study name                                   | Endnote | Intervention                  | N   | Follow-up period | Type of outcome | Outcome description                                                                                                                                         | With or without containment products | % of patients with outcome |
|----------------------------------------------|---------|-------------------------------|-----|------------------|-----------------|-------------------------------------------------------------------------------------------------------------------------------------------------------------|--------------------------------------|----------------------------|
| <b>Men – Lifestyle Advice (Unsupervised)</b> |         |                               |     |                  |                 |                                                                                                                                                             |                                      |                            |
| Glazener 2011                                | #847    | Lifestyle advice (after RP)   | 195 | 12m              | Cure            | No incontinence - no positive response to either “how often do you leak urine?” or “how much urine do you usually leak (whether you wear protection or not) | NR                                   | 23%                        |
| Glazener 2011                                | #847    | Lifestyle advice (after TURP) | 203 | 12m              | Cure            | No incontinence - no positive response to either “how often do you leak urine?” or “how much urine do you usually leak (whether you wear protection or not) | NR                                   | 38%                        |

Table S9: Study characteristics for patients with MUI

| Study name                             | Endnote | N        | Inclusion criteria                                                                                                                                                                                                                                                                                                                                                              | Mean/<br>Median<br>age (yrs) | % of<br>males | RoB<br>No.<br>Low* |
|----------------------------------------|---------|----------|---------------------------------------------------------------------------------------------------------------------------------------------------------------------------------------------------------------------------------------------------------------------------------------------------------------------------------------------------------------------------------|------------------------------|---------------|--------------------|
| <b>WOMEN</b>                           |         |          |                                                                                                                                                                                                                                                                                                                                                                                 |                              |               |                    |
| Palomba 2014 <sup>86</sup>             | #4757   | 209      | p. 304: the diagnosis of SUI/MUI confirmed by urodynamic assessment; incontinent after conservative management, in MUI -persistent, clinically significant SUI under oral antimuscarinic therapy                                                                                                                                                                                | 64.1 /63.8                   | 0             | 17                 |
| Schagen van Leeuwen 2008 <sup>88</sup> | #11523  | 126      | Community-dwelling women of ≥65 years with symptoms of SUI or S-MUI for ≥3 consecutive months and ≥7 incontinence episodes per week as determined by the stress/urge incontinence questionnaire S/UIQ were eligible. For patients in the S-MUI group, ≥50% of incontinence episodes had to be due to stress.                                                                    | 70.6                         | 0             | 17                 |
| Williams 2006 <sup>84</sup>            | #4019   | 238      | Women with a urodynamic diagnosis of USI or mixed UI and DO who had already had an 8-week primary-care intervention.                                                                                                                                                                                                                                                            | 57                           | 0             | 16                 |
| Williams 2005 <sup>44</sup>            | #11505  | 224<br>0 | >=1 of the symptoms: "incontinence several times per month or more, or several times a year plus reported impact of symptoms on quality of life; frequency, hourly or more, or 2-hourly plus impact; nocturia, three times per night, or twice a night plus impact; or urgency, very strong or overwhelming, or strong with impact."                                            | NR                           | 38%           | 15                 |
| Natale 2014 <sup>85</sup>              | #4664   | 92       | Females with primary stress urinary incontinence (SUI) or mixed urinary incontinence with predominant SUI, diagnosed using both the cough stress test and urodynamics. All had unsuccessfully undergone prior pelvic floor training                                                                                                                                             | 58                           | 0             | 15                 |
| Glazener 2014 <sup>41</sup>            | #13156  | 230      | Urinary incontinence 3 months after 'index' delivery                                                                                                                                                                                                                                                                                                                            | 30.2                         | 0             | 14                 |
| Primus 2006 <sup>83</sup>              | #4000   | 103      | Women who presented with urinary incontinence symptoms, including genuine, recurrent or mixed stress. All patients had unsuccessfully attempted treating their symptoms using pelvic floor exercises. Patients who indicated that these symptoms represented a significant negative impact on their life and who expressed a strong desire to have the operation were included. | 60.2                         | 0             | 14                 |
| Dias 2014 <sup>87</sup>                | #4991   | 50       | age >18 years; a history of clinically pure SUI or MUI with predominantly bothersome SUI symptoms; a positive cough stress test (CST) with clinical hypermobility of the urethra; previous failed or denied conservative therapy                                                                                                                                                | 53.2±10.9                    | 0             | 14                 |
| Surwitt 2009 <sup>97</sup>             | #10558  | 256      | Urge incontinence or mixed incontinence; all received conservative treatment                                                                                                                                                                                                                                                                                                    | 56 (Med)                     | 0             | 12                 |
| Kondo 2007 <sup>82</sup>               | #3822   | 79       | In the present investigation a long-term assessment was performed through a questionnaire that                                                                                                                                                                                                                                                                                  | 53.2                         | 0             | 12                 |



| Study name                         | Endnote | N   | Inclusion criteria                                                                                                                                                                                                                                                                                                                                                                                                                                                                                       | Mean/<br>Median<br>age (yrs) | % of<br>males | RoB<br>No.<br>Low* |
|------------------------------------|---------|-----|----------------------------------------------------------------------------------------------------------------------------------------------------------------------------------------------------------------------------------------------------------------------------------------------------------------------------------------------------------------------------------------------------------------------------------------------------------------------------------------------------------|------------------------------|---------------|--------------------|
|                                    |         |     | was dispatched to 112 women who had been evaluated at the second, medium-term assessment.                                                                                                                                                                                                                                                                                                                                                                                                                |                              |               |                    |
| Abdel-Hady 2005 <sup>46</sup>      | #4495   | 454 | Women with SUI as a main complaint in whom conservative measures, including pelvic floor exercises, or in case of UUI anticholinergics, failed                                                                                                                                                                                                                                                                                                                                                           | 57 (Med)                     | 0             | 10                 |
| Staskin 2006 <sup>40</sup>         | #11558  | 319 | A subgroup of 1041 patients with a history of MUI (patients responded 'yes' when asked if they had a history of mixed stress and urge symptoms) were identified for post hoc analysis. In original studies: Outpatient men and women aged ≥ 18 years were included in the study. Patients were required to have a mean of ≥ 8 voids/24 h, and a mean of ≥ 1 UI episode/24 h or a mean of ≥ 1 urgency episode/24 h during the baseline 3-day voiding diary period, to be eligible for study participation | NR                           | 20%           | 6                  |
| <b>MEN</b>                         |         |     |                                                                                                                                                                                                                                                                                                                                                                                                                                                                                                          |                              |               |                    |
| Glazener 2011 <sup>99</sup>        | #847    | 788 | Between January, 2005, and September, 2008, we identified men having prostate surgery in 34 UK centres and invited them to receive a screening questionnaire 3 weeks after surgery. Those who reported urinary incontinence in this questionnaire were invited for random assignment into our study groups.                                                                                                                                                                                              | 62.4/62.3<br>/68.2/67.9      | 100%          | 18                 |
| Manassero 2007 <sup>43</sup>       | #11477  | 54  | Objectively confirmed urinary incontinence (>2 g of urine loss on 24 hr Pad test); good general condition                                                                                                                                                                                                                                                                                                                                                                                                | 66.8                         | 100%          | 17                 |
| Astellas Pharma 2014 <sup>45</sup> | #13488  | 313 | Ambulatory; Willing and able to complete study questionnaires; Has not used any medication for over-active bladder symptoms for at least 14 days prior to enrolment; Diagnosed with prostate cancer, treated by Robotic Assisted Radical Prostatectomy; voiding spontaneously; urinary incontinence one week after removal of the indwelling catheter which requires management with 2 to 10 pads inclusive per day (24 hour days) for 7 consecutive days.                                               | 60.5                         | 100%          | 13                 |
| Moore 2008 <sup>42</sup>           | #11474  | 166 | English- or French-speaking men; booked for RRP; could attend weekly PFMT sessions or maintain weekly contact with the research nurse                                                                                                                                                                                                                                                                                                                                                                    | NR                           | 100%          | 13                 |

\*) Number of low risk items in the Risk of Bias assessment (out of 20 items in total – See Table 5)

Table S10: Treatment characteristics in studies for patients with MUI

| Study name                       | Endnote | Treatment                           | Further details of intervention                                                                                                                                                                                                                                                                                                                                                                                                                               | Duration of treatment           |
|----------------------------------|---------|-------------------------------------|---------------------------------------------------------------------------------------------------------------------------------------------------------------------------------------------------------------------------------------------------------------------------------------------------------------------------------------------------------------------------------------------------------------------------------------------------------------|---------------------------------|
| <b>WOMEN – TVT</b>               |         |                                     |                                                                                                                                                                                                                                                                                                                                                                                                                                                               |                                 |
| Abdel-Hady 2005                  | #4495   | TVT                                 | TVT performed under spinal anaesthetic according to previously described technique                                                                                                                                                                                                                                                                                                                                                                            | Single procedure                |
| Palomba 2014                     | #4757   | retropubic TVT                      | SPARC system (Tegea for AMS)                                                                                                                                                                                                                                                                                                                                                                                                                                  | Single procedure                |
| Primus 2006                      | #4000   | SPARC sling system                  | The SPARC Female Sling System uses a suprapubic surgical approach to position the sling under the midurethra, employing 2 thin, curved stainless steel needles advanced via two small incisions above the pubic bone to a vaginal incision below the urethra.                                                                                                                                                                                                 | Surgery (42min)                 |
| <b>WOMEN – Sling</b>             |         |                                     |                                                                                                                                                                                                                                                                                                                                                                                                                                                               |                                 |
| Natale 2014                      | #4664   | Single-Incision-Sling               | Single Incision Sling (Ajust™ C.R. Bard Inc., New Providence, NJ, USA)                                                                                                                                                                                                                                                                                                                                                                                        | Single procedure                |
| Palomba 2014                     | #4757   | single-incision mini-slings         | Ajust (Bard SpA, Rome, Italy), MiniArc (Tegea for AMS, Bologna, Italy), or TVT Secur System (Johnson & Johnson, Rome, Italy)                                                                                                                                                                                                                                                                                                                                  | Single procedure                |
| Dias 2014                        | #4991   | single-incision sling (SIS)         | Altis® (Coloplast)                                                                                                                                                                                                                                                                                                                                                                                                                                            | Single procedure                |
| <b>WOMEN – PFMT (Supervised)</b> |         |                                     |                                                                                                                                                                                                                                                                                                                                                                                                                                                               |                                 |
| Williams 2006                    | #4019   | Intensive PFMT                      | Training in PFMT was provided by specially trained nurses, after an initial digital assessment and perineometry. Women were taught how to do correct PF contractions and an individualized exercise regimen was given.                                                                                                                                                                                                                                        | 3 months                        |
| Kondo 2007                       | #3822   | Pelvic floor muscle training (PFMT) | Conducted for 8 consecutive weeks. Essentially, the training comprised repeated muscle contractions of the pelvic floor and the rapid locking of the perineum just before the abdominal strain. In the training session experienced nurses and doctors supervised the exercises, and they taught how continence was maintained or lost and the treatment rationale was also explained. At home women were instructed to practice the exercise 30 times a day. | 8 weeks (60–90 min once a week) |
| Surwitt 2009                     | #10558  | Tibial Nerve Neuromodulation+       | Percutaneous tibial nerve neuromodulation (Urgent PC, Uroplasty                                                                                                                                                                                                                                                                                                                                                                                               | NR                              |

| Study name                                                                                         | Endnote | Treatment                                                 | Further details of intervention                                                                                                                                                                                                                                                 | Duration of treatment |
|----------------------------------------------------------------------------------------------------|---------|-----------------------------------------------------------|---------------------------------------------------------------------------------------------------------------------------------------------------------------------------------------------------------------------------------------------------------------------------------|-----------------------|
|                                                                                                    |         | PFMRhabili-tation (training, biofeedback and stimulation) | Inc., Minneapolis, MN, USA) and pelvic floor muscle rehabilitation (Evadri System, Hollister Inc., Libertyville, IL, USA)                                                                                                                                                       |                       |
| Williams 2005                                                                                      | #11505  | continence service - behavioural and lifestyle/control    | 4 planned visits over 8 wks, advice on diet and fluids; bladder training; pelvic floor awareness and healthy eating; and treatment for candida and urinary tract infection where indicated.                                                                                     | 8 wks                 |
| <b>WOMEN – Vaginal cone therapy</b>                                                                |         |                                                           |                                                                                                                                                                                                                                                                                 |                       |
| Williams 2006                                                                                      | #4019   | Vaginal cone therapy                                      | At the first clinical visit after randomization women were instructed how to insert the cones, supervised by the nurse; during this consultation the appropriate weight of cone for starting treatment was identified (Femina, Urohealth Systems Inc., Newport Beach, CA, USA). | 3 months              |
| <b>WOMEN – PFMT for pregnant women with urinary incontinence (3 months after ‘index’ delivery)</b> |         |                                                           |                                                                                                                                                                                                                                                                                 |                       |
| Glazener 2014                                                                                      | #13156  | Conservative treatment enhanced - mainly PFMT             | one-to-one instruction in PFMT, with bladder training if indicated, 3 visits after birth                                                                                                                                                                                        | 9 months              |
| <b>WOMEN – Lifestyle Advice (Supervised)</b>                                                       |         |                                                           |                                                                                                                                                                                                                                                                                 |                       |
| Williams 2006                                                                                      | #4019   | Continued primary behaviour intervention                  | Advice on fluid intake, caffeine intake, bladder re-education, PF awareness (PFA) and weight loss. This was continuation of an 8-week period for all three arms.                                                                                                                | 3 months              |
| <b>WOMEN – Antimuscarinics</b>                                                                     |         |                                                           |                                                                                                                                                                                                                                                                                 |                       |
| Staskin 2006                                                                                       | #11558  | Antimuscarinic-solifenacin                                | 5 or 10 mg                                                                                                                                                                                                                                                                      | up to 12              |
| <b>Women- Duloxetine</b>                                                                           |         |                                                           |                                                                                                                                                                                                                                                                                 |                       |
| Schagen van Leeuwen 2008                                                                           | #11523  | Duloxetine                                                | Oral 20mg bid for 2 weeks and 40mg bid for 10 weeks                                                                                                                                                                                                                             | 12 wks                |
| <b>MEN</b>                                                                                         |         |                                                           |                                                                                                                                                                                                                                                                                 |                       |
| <b>MEN – Antimuscarinics</b>                                                                       |         |                                                           |                                                                                                                                                                                                                                                                                 |                       |
| Astellas Pharma 2014                                                                               | #13488  | Antimuscarinic-solifenacin                                | 5mg                                                                                                                                                                                                                                                                             | 12 wks                |

| Study name                                   | Endnote | Treatment                     | Further details of intervention                                                                                                                                                                                                                                                                                                                                                                                                                                                                              | Duration of treatment      |
|----------------------------------------------|---------|-------------------------------|--------------------------------------------------------------------------------------------------------------------------------------------------------------------------------------------------------------------------------------------------------------------------------------------------------------------------------------------------------------------------------------------------------------------------------------------------------------------------------------------------------------|----------------------------|
| <b>MEN - PFMT (Supervised)</b>               |         |                               |                                                                                                                                                                                                                                                                                                                                                                                                                                                                                                              |                            |
| Glazener 2011                                | #847    | PFMT (after RP)               | Four one-to-one sessions held over 3 months with a therapist and received a supplementary MAPS pelvic-floor exercise leaflet, aimed at establishing a home exercise regimen. The therapists were either specialist continence physiotherapists or specialist continence or urology nurses.                                                                                                                                                                                                                   | 3m                         |
| Glazener 2011                                | #847    | PFMT (after TURP)             | Four one-to-one sessions held over 3 months with a therapist and received a supplementary MAPS pelvic-floor exercise leaflet, aimed at establishing a home exercise regimen. The therapists were either specialist continence physiotherapists or specialist continence or urology nurses.                                                                                                                                                                                                                   | 3m                         |
| Moore 2008                                   | #11474  | PFMT guided                   | standardized daily home routine, weekly 30-minute biofeedback-assisted PFMT (InCare PRS9500, Ontario, Canada)                                                                                                                                                                                                                                                                                                                                                                                                | 5.5 mo                     |
| Manassero 2007                               | #11477  | PFMT                          | p. 986: pelvic floor re-education programme; Verbal feedback of the contraction; Initial home practice 45 contractions (3 sessions of 15) per day at home, progressively increasing the until 90 per day.                                                                                                                                                                                                                                                                                                    | until incontinence or 1 yr |
| <b>MEN – PFMT (Unsupervised)</b>             |         |                               |                                                                                                                                                                                                                                                                                                                                                                                                                                                                                                              |                            |
| Moore 2008                                   | #11474  | PFMT written handout          | handout and telephone contact                                                                                                                                                                                                                                                                                                                                                                                                                                                                                | 5.5 mo                     |
| <b>MEN – Lifestyle Advice (Unsupervised)</b> |         |                               |                                                                                                                                                                                                                                                                                                                                                                                                                                                                                                              |                            |
| Glazener 2011                                | #847    | Lifestyle advice (after RP)   | Lifestyle advice leaflet that described the influence of fluid intake, caffeine, diet, constipation, fitness, lifting, chest problems, and urinary tract infections on continence. No information was provided in the leaflet about pelvic-floor exercises or techniques for dealing with urgency symptoms. Men having radical prostatectomy are commonly told about pelvic-floor exercises by health-care professionals and information is also widely available in the public domain—eg, via the internet. | 3m                         |
| Glazener 2011                                | #847    | Lifestyle advice (after TURP) | Lifestyle advice leaflet that described the influence of fluid intake,                                                                                                                                                                                                                                                                                                                                                                                                                                       | 3m                         |

| Study name | Endnote | Treatment | Further details of intervention                                                                                                                                                                                                                                                                                                                                                                                                              | Duration of treatment |
|------------|---------|-----------|----------------------------------------------------------------------------------------------------------------------------------------------------------------------------------------------------------------------------------------------------------------------------------------------------------------------------------------------------------------------------------------------------------------------------------------------|-----------------------|
|            |         |           | <p>caffeine, diet, constipation, fitness, lifting, chest problems, and urinary tract infections on continence. No information was provided in the leaflet about pelvic-floor exercises or techniques for dealing with urgency symptoms. Men having radical prostatectomy are commonly told about pelvic-floor exercises by health-care professionals and information is also widely available in the public domain—eg, via the internet.</p> |                       |

Table S11: Results of interventions for patients with MUI

| Study name         | Endnote | Intervention | N   | Follow-up period | Type of outcome | Outcome description                                               | With or without containment products | % of patients with outcome |
|--------------------|---------|--------------|-----|------------------|-----------------|-------------------------------------------------------------------|--------------------------------------|----------------------------|
| <b>WOMEN – TVT</b> |         |              |     |                  |                 |                                                                   |                                      |                            |
| Abdel-Hady 2005    | #4495   | TVT          | 454 | 6 mo             | Subjective      | Subjective perception of cure                                     | NR                                   | 91%                        |
| Abdel-Hady 2005    | #4495   | TVT          | 454 | 6 mo             | Subjective      | Subjective perception improved >50%                               | NR                                   | 8%                         |
| Palomba 2014       | #4757   | r-TVT        | 117 | 6mo              | Subjective      | Proportion of women who reported being either “dry” or “improved’ | NR                                   | 94.9%                      |
| Palomba 2014       | #4757   | r-TVT        | 115 | 12mo             | Subjective      | Same as above                                                     | NR                                   | 83.5%                      |
| Palomba 2014       | #4757   | r-TVT        | 111 | 18mo             | Subjective      | Same as above                                                     | NR                                   | 82.9%                      |
| Palomba 2014       | #4757   | r-TVT        | 106 | 24mo             | Subjective      | Same as above                                                     | NR                                   | 84.0%                      |
| Palomba 2014       | #4757   | r-TVT        | 117 | 6mo              | Objective cure  | No leakage of urine during the stress test                        | NR                                   | 89.7%                      |
| Palomba 2014       | #4757   | r-TVT        | 115 | 12mo             | Objective cure  | Same as above                                                     | NR                                   | 86.1%                      |
| Palomba 2014       | #4757   | r-TVT        | 111 | 18mo             | Objective cure  | Same as above                                                     | NR                                   | 80.1%                      |
| Palomba 2014       | #4757   | r-TVT        | 106 | 24mo             | Objective cure  | Same as above                                                     | NR                                   | 77.4%                      |
| Primus 2006        | #4000   | SPARC sling  | 89  | 3m               | Objective cure  | Negative cough stress test and negative pad test (0–1 g)          | With                                 | 83.10%                     |
| Primus 2006        | #4000   | SPARC sling  | 79  | 6m               | Objective cure  | Same as above                                                     | With                                 | 82.30%                     |
| Primus 2006        | #4000   | SPARC sling  | 64  | 12m              | Objective cure  | Same as above                                                     | With                                 | 84.40%                     |
| Primus 2006        | #4000   | SPARC sling  | 89  | 3m               | Subjective cure | No urine loss during daily activities/no usage of pads.           | With                                 | 79.80%                     |
| Primus 2006        | #4000   | SPARC sling  | 79  | 6m               | Subjective cure | Same as above                                                     | With                                 | 81%                        |
| Primus 2006        | #4000   | SPARC sling  | 64  | 12m              | Subjective cure | Same as above                                                     | With                                 | 75%                        |

| Study name           | Endnote | Intervention          | N   | Follow-up period | Type of outcome        | Outcome description                                                                              | With or without containment products | % of patients with outcome |
|----------------------|---------|-----------------------|-----|------------------|------------------------|--------------------------------------------------------------------------------------------------|--------------------------------------|----------------------------|
| <b>WOMEN – Sling</b> |         |                       |     |                  |                        |                                                                                                  |                                      |                            |
| Natale 2014          | #4664   | Single-Incision-Sling | 92  | 2y               | Objectives cure        | Negative Cough Stress Test (CST)                                                                 | NR                                   | 83.7%                      |
| Natale 2014          | #4664   | Single-Incision-Sling | 92  | 2y               | Subjective on PGI-I    | Much or very much improved                                                                       | NR                                   | 81.5%                      |
| Palomba 2014         | #4757   | Single-Incision-Sling | 118 | 6mo              | Subjective             | Proportion of women who reported being either “dry” or “improved’                                | NR                                   | 90.7%                      |
| Palomba 2014         | #4757   | Single-Incision-Sling | 113 | 12mo             | Subjective             | Same as above                                                                                    | NR                                   | 63.7%                      |
| Palomba 2014         | #4757   | Single-Incision-Sling | 108 | 18mo             | Subjective             | Same as above                                                                                    | NR                                   | 56.5%                      |
| Palomba 2014         | #4757   | Single-Incision-Sling | 103 | 24mo             | Subjective             | Same as above                                                                                    | NR                                   | 55.3%                      |
| Palomba 2014         | #4757   | Single-Incision-Sling | 118 | 6mo              | Objective cure         | No leakage of urine during the stress test                                                       | NR                                   | 81.3%                      |
| Palomba 2014         | #4757   | Single-Incision-Sling | 113 | 12mo             | Objective cure         | Same as above                                                                                    | NR                                   | 63.7%                      |
| Palomba 2014         | #4757   | Single-Incision-Sling | 108 | 18mo             | Objective cure         | Same as above                                                                                    | NR                                   | 52.8%                      |
| Palomba 2014         | #4757   | Single-Incision-Sling | 103 | 24mo             | Objective cure         | Same as above                                                                                    | NR                                   | 50.5%                      |
| Dias 2014            | #4991   | Single-incision sling | 50  | 1yr              | Subjective cure        | ICIQ-SF =0                                                                                       | NR                                   | 84%                        |
| Dias 2014            | #4991   | Single-incision sling | 50  | 1yr              | Subjective improvement | ICIQ-SF lower than the preoperative but >0 AND subjective perception of improvement/satisfaction | NR                                   | 8%                         |
| Dias 2014            | #4991   | Single-incision sling | 50  | 1yr              | Objective cure         | No leakage of urine during a CST and patient-reported no pad usage                               | Without                              | 90.2%                      |
| Dias 2014            | #4991   | Single-incision sling | 50  | 3 mo             | Subjective cure        | ICIQ-SF =0                                                                                       | NR                                   | 88.5%                      |
| Dias 2014            | #4991   | Single-incision sling | 50  | 3 mo             | Subjective improvement | ICIQ-SF lower than the preoperative but >0 AND subjective perception of improvement/satisfaction | NR                                   | 5.8%                       |

| Study name                       | Endnote | Intervention                        | N   | Follow-up period | Type of outcome              | Outcome description                                                                              | With or without containment products | % of patients with outcome |
|----------------------------------|---------|-------------------------------------|-----|------------------|------------------------------|--------------------------------------------------------------------------------------------------|--------------------------------------|----------------------------|
| Dias 2014                        | #4991   | Single-incision sling               | 50  | 3mo              | Objective cure               | No leakage of urine during a CST and patient-reported no pad usage                               | Without                              | 94.1%                      |
| Dias 2014                        | #4991   | Single-incision sling               | 50  | 6 mo             | Subjective cure              | ICIQ-SF =0                                                                                       | NR                                   | 82.0%                      |
| Dias 2014                        | #4991   | Single-incision sling               | 50  | 6 mo             | Subjective improvement       | ICIQ-SF lower than the preoperative but >0 AND subjective perception of improvement/satisfaction | NR                                   | 12%                        |
| Dias 2014                        | #4991   | Single-incision sling               | 50  | 6 mo             | Objective cure               | No leakage of urine during a CST and patient-reported no pad usage                               | Without                              | 89.8%                      |
| <b>WOMEN – PFMT (Supervised)</b> |         |                                     |     |                  |                              |                                                                                                  |                                      |                            |
| Williams 2006                    | #4019   | Intensive PFMT                      | 77  | 3m               | Cure                         | No symptoms                                                                                      | NR                                   | 5                          |
| Kondo 2007                       | #3822   | Pelvic floor muscle training (PFMT) | 112 | 2y               | Subjective treatment success | Self-reported completely cured or more than 50% improved                                         | NR                                   | 40%                        |
| Kondo 2007                       | #3822   | Pelvic floor muscle training (PFMT) | 79  | 8y               | Subjective cure              | Self-reported completely cured.                                                                  | NR                                   | 17%                        |
| Kondo 2007                       | #3822   | Pelvic floor muscle training (PFMT) | 79  | 8y               | Subjective improvement       | Self-reported more than 50% improvement.                                                         | NR                                   | 23%                        |
| Kondo 2007                       | #3822   | Pelvic floor muscle training (PFMT) | 79  | 8y               | Subjective treatment success | Self-reported completely cured or more than 50% improved                                         | NR                                   | 39%                        |
| Surwitt 2009                     | #10558  | PFMR+Neuromodulation                | 256 | 3mo              | Success                      | An absence of incontinent episodes (dry) and an OAB-V8 score <8, indicating no OAB               | NR                                   | 93%                        |
| Surwitt 2009                     | #10558  | PFMR+Neuromodulation                | 256 | 3 mo             | Improvement                  | Improvement in incontinence episodes                                                             | NR                                   | 7%                         |



| Study name                                                                                         | Endnote | Intervention                                           | N    | Follow-up period | Type of outcome                   | Outcome description                                                                                                                       | With or without containment products | % of patients with outcome |
|----------------------------------------------------------------------------------------------------|---------|--------------------------------------------------------|------|------------------|-----------------------------------|-------------------------------------------------------------------------------------------------------------------------------------------|--------------------------------------|----------------------------|
| Surwitt 2009                                                                                       | #10558  | PFMR+Neuromodulation                                   | 123  | 3mo              | Success                           | An absence of incontinent episodes (dry) and an OAB-V8 score <8, indicating no OAB                                                        | NR                                   | 91%                        |
| Surwitt 2009                                                                                       | #10558  | PFMR+Neuromodulation                                   | 133  | 3mo              | Success                           | Same as above                                                                                                                             | NR                                   | 94%                        |
| Williams 2005                                                                                      | #11505  | continence service - behavioural and lifestyle/control | 2378 | 3 mo             | CUre                              | No symptoms                                                                                                                               | NR                                   | 25%                        |
| Williams 2005                                                                                      | #11505  | continence service - behavioural and lifestyle/control | 2201 | 6 mo             | Cure                              | No symptoms                                                                                                                               | NR                                   | 28%                        |
| Williams 2005                                                                                      | #11505  | continence service - behavioural and lifestyle/control | 2378 | 3 mo             | Improvement                       | Improvement in one or more symptoms assessed using validated symptom severity questions: of incontinence, urgency, frequency and nocturia | NR                                   | 60%                        |
| Williams 2005                                                                                      | #11505  | continence service - behavioural and lifestyle/control | 2201 | 6 mo             | Improvement                       | Same as above                                                                                                                             | NR                                   | 62%                        |
| Williams 2005                                                                                      | #11505  | continence service - behavioural and lifestyle/control | 2468 | 3 mo             | Improvement subjective perception | Self reporting mild problem or no problem                                                                                                 | NR                                   | 74%                        |
| Williams 2005                                                                                      | #11505  | continence service - behavioural and lifestyle/control | 2181 | 6 mo             | Improvement subjective perception | Same as above                                                                                                                             | NR                                   | 79%                        |
| <b>WOMEN – Vaginal cone therapy</b>                                                                |         |                                                        |      |                  |                                   |                                                                                                                                           |                                      |                            |
| Williams 2006                                                                                      | #4019   | Vaginal cone therapy                                   | 79   | 3m               | Cure                              | No symptoms                                                                                                                               | NR                                   | 9                          |
| <b>WOMEN – PFMT for pregnant women with urinary incontinence (3 months after 'index' delivery)</b> |         |                                                        |      |                  |                                   |                                                                                                                                           |                                      |                            |
| Glazener 2014                                                                                      | #13156  | Conservative, mainly                                   | 230  | 12 yrs           | Cure                              | No urinary incontinence 12 y after                                                                                                        | NR                                   | 17%                        |

| Study name                                   | Endnote | Intervention                             | N   | Follow-up period | Type of outcome   | Outcome description                                                                                                                                         | With or without containment products | % of patients with outcome |
|----------------------------------------------|---------|------------------------------------------|-----|------------------|-------------------|-------------------------------------------------------------------------------------------------------------------------------------------------------------|--------------------------------------|----------------------------|
|                                              |         | PFMT                                     |     |                  |                   | intervention                                                                                                                                                |                                      |                            |
| <b>WOMEN – Lifestyle Advice (Supervised)</b> |         |                                          |     |                  |                   |                                                                                                                                                             |                                      |                            |
| Williams 2006                                | #4019   | Continued primary behaviour intervention | 75  | 3m               | Cure              | No symptoms                                                                                                                                                 | NR                                   | 8                          |
| <b>WOMEN – Antimuscarinics</b>               |         |                                          |     |                  |                   |                                                                                                                                                             |                                      |                            |
| Staskin 2006                                 | #11558  | Antimuscarinic-solifenacin               | 319 | 52 wks           | Cure              | no episodes of UI or symptomatic urgency during their final 3-day diary period                                                                              | NR                                   | 52%                        |
| <b>WOMEN- Duloxetine</b>                     |         |                                          |     |                  |                   |                                                                                                                                                             |                                      |                            |
| Schagen van Leeuwen 2008                     | #11523  | Duloxetine                               | 126 | 12 wks           | Improvement IEF   | Responder IEF: ≥50% reduction in Incontinence Episode Frequency (IEF) from baseline to endpoint.                                                            | Without                              | 57%                        |
| Schagen van Leeuwen 2008                     | #11523  | Duloxetine                               | 128 | 12 wks           | Improvement I-QoL | Responder I-QoL: increase in the I-QoL total score of ≥6.3 points from baseline to endpoint.                                                                | Without                              | 55%                        |
| Schagen van Leeuwen 2008                     | #11523  | Duloxetine                               | 129 | 12 wks           | Improvement PGI-I | Very much better or much better PGI-I                                                                                                                       | Without                              | 53.5%                      |
| <b>MEN</b>                                   |         |                                          |     |                  |                   |                                                                                                                                                             |                                      |                            |
| <b>MEN – Antimuscarinics</b>                 |         |                                          |     |                  |                   |                                                                                                                                                             |                                      |                            |
| Astellas Pharma 2014                         | #13488  | Solifenacin                              | 313 | 12 wks           | Cure              | Gained continence -completely dry                                                                                                                           | Without                              | 26.5 %                     |
| <b>MEN – PFMT (Supervised)</b>               |         |                                          |     |                  |                   |                                                                                                                                                             |                                      |                            |
| Glazener 2011                                | #847    | PFMT (after RP)                          | 196 | 12m              | Cure              | No incontinence - no positive response to either “how often do you leak urine?” or “how much urine do you usually leak (whether you wear protection or not) | NR                                   | 24%                        |

| Study name                                   | Endnote | Intervention                  | N   | Follow-up period | Type of outcome | Outcome description                                                                                                                                         | With or without containment products | % of patients with outcome |
|----------------------------------------------|---------|-------------------------------|-----|------------------|-----------------|-------------------------------------------------------------------------------------------------------------------------------------------------------------|--------------------------------------|----------------------------|
| Glazener 2011                                | #847    | PFMT (after TURP)             | 194 | 12m              | Cure            | No incontinence – same as above                                                                                                                             | NR                                   | 35%                        |
| Manassero 2007                               | #11477  | PFMT                          | 54  | 12 mo            | Cure            | Not incontinent on pad test                                                                                                                                 | NR                                   | 83.4%                      |
| Manassero 2007                               | #11477  | PFMT                          | 54  | 6mo              | Cure            | Same as above                                                                                                                                               | NR                                   | 66.7%                      |
| Manassero 2007                               | #11477  | PFMT                          | 54  | 3 mo             | Cure            | Same as above                                                                                                                                               | NR                                   | 46.3%                      |
| Moore 2008                                   | #11474  | PFMT guided                   | 94  | 16 wk            | Cure            | Continent -8 g or less of urine loss on a 24-hour pad test                                                                                                  | NR                                   | 44%                        |
| Moore 2008                                   | #11474  | PFMT guided                   | 87  | 28 wk            | Cure            | Same as above                                                                                                                                               | NR                                   | 47%                        |
| Moore 2008                                   | #11474  | PFMT guided                   | 89  | 1 yr             | Cure            | Same as above                                                                                                                                               | NR                                   | 60%                        |
| <b>MEN – PFMT (Unsupervised)</b>             |         |                               |     |                  |                 |                                                                                                                                                             |                                      |                            |
| Moore 2008                                   | #11474  | PFMT handout                  | 80  | 16 wk            | Cure            | Same as above                                                                                                                                               | NR                                   | 40%                        |
| Moore 2008                                   | #11474  | PFMT handout                  | 74  | 28 wk            | Cure            | Same as above                                                                                                                                               | NR                                   | 50%                        |
| Moore 2008                                   | #11474  | PFMT handout                  | 77  | 1 yr             | Cure            | Same as above                                                                                                                                               | NR                                   | 64%                        |
| <b>MEN – Lifestyle Advice (Unsupervised)</b> |         |                               |     |                  |                 |                                                                                                                                                             |                                      |                            |
| Glazener 2011                                | #847    | Lifestyle advice (after RP)   | 195 | 12m              | Cure            | No incontinence - no positive response to either “how often do you leak urine?” or “how much urine do you usually leak (whether you wear protection or not) | NR                                   | 23%                        |
| Glazener 2011                                | #847    | Lifestyle advice (after TURP) | 203 | 12m              | Cure            | No incontinence – same as above                                                                                                                             | NR                                   | 38%                        |

Table S12: Study characteristics for patients with FI

| Study name                  | Endnote | N   | Inclusion criteria                                                                                                                                                                                                                                                                                                                                                                                                                | Mean/<br>Median<br>age (yrs) | % of<br>males | RoB<br>No.<br>Low* |
|-----------------------------|---------|-----|-----------------------------------------------------------------------------------------------------------------------------------------------------------------------------------------------------------------------------------------------------------------------------------------------------------------------------------------------------------------------------------------------------------------------------------|------------------------------|---------------|--------------------|
| <b>WOMEN</b>                |         |     |                                                                                                                                                                                                                                                                                                                                                                                                                                   |                              |               |                    |
| Leroi 2012 <sup>16</sup>    | #9773   | 66  | Patients with FI>3 months; failure of conservative treatments; not a candidate for conservative treatments; ≥ 18 years of age                                                                                                                                                                                                                                                                                                     | 60 (med)                     | 7%            | 18                 |
| Damon 2014 <sup>34</sup>    | #1373   | 157 | All patients aged between 18 and 85 years who attended the outpatient clinics of these departments for AI were invited to participate in the trial. Symptoms had to have been present for at least the last 6 months (i.e. at least a gas or liquid leak once a week for at least 6 months with impact on quality of life), and patients had to have a Cleveland Clinic Faecal Incontinence score (CCFI, Jorge & Wexner score) ≥5 | 61                           | 23%           | 17                 |
| Graf 2011 <sup>29</sup>     | #10132  | 125 | Age 18–75 years; FI by CCFIS (Cleveland Clinic Florida Incontinence score) ≥9; at least four recorded incontinence episodes in 2 weeks; symptoms ≥12 months; failure of medically supervised conservative treatment                                                                                                                                                                                                               | 61.8<br>(med)                | 10%           | 17                 |
| Byrne 2007 <sup>32</sup>    | #3856   | 513 | Confirmed mild-to-moderate neuropathic faecal incontinence.                                                                                                                                                                                                                                                                                                                                                                       | 61.9                         | 11%           | 14                 |
| Wexner 2010 <sup>27</sup>   | #2918   | 67  | Chronic FI > 6 months or >12 months after vaginal childbirth; >2 incontinent episodes on average per week, not just staining; failure or not candidates for more conservative treatments; ≥18 yrs                                                                                                                                                                                                                                 | 60.5                         | 8%            | 12                 |
| Boyle 2011 <sup>36</sup>    | #2320   | 50  | Faecal incontinence unresponsive to conservative management; symptoms that were refractory to maximal conservative treatment (including biofeedback), and had undergone a detailed clinical history and investigation to exclude any obvious organic cause for their incontinence.                                                                                                                                                | 55                           | 6%            | 12                 |
| Tijandra 2008 <sup>33</sup> | #11675  | 53  | Involuntary passage of solid or liquid stool ≥1/wk; refractory to medical therapy and pelvic floor exercises; age 35 to 86 years                                                                                                                                                                                                                                                                                                  | 63.4                         | 8%            | 10                 |
| Paquette 2014 <sup>28</sup> | #6392   | 111 | Patients with >2 episodes of FI per week; failure of conservative measures; for chronic implantation >50% improvement of symptoms during stage 1 test stimulation                                                                                                                                                                                                                                                                 | 67 (med)                     | NR            | 9                  |
| Sze 2009 <sup>31</sup>      | #3161   | 59  | Women who had faecal incontinence at least once a week regardless of the amount of loss, for at least six months. Those who were incontinent of liquid stool, were referred for evaluation and colonoscopy, and were included in the study if they had benign findings.                                                                                                                                                           | 58.6                         | 0             | 9                  |
| Uludag 2011 <sup>35</sup>   | #2304   | 50  | Patients, in whom conservative treatment had failed, underwent permanent SNM when a decrease of at least 50% in the number of incontinence episodes was seen during peripheral nerve evaluation (PNE).                                                                                                                                                                                                                            | 54.3<br>(med)                | 10%           | 8                  |

| Study name                | Endnote | N  | Inclusion criteria                                                                                                                                                   | Mean/<br>Median<br>age (yrs) | % of<br>males | RoB<br>No.<br>Low* |
|---------------------------|---------|----|----------------------------------------------------------------------------------------------------------------------------------------------------------------------|------------------------------|---------------|--------------------|
| <b>MEN</b>                |         |    |                                                                                                                                                                      |                              |               |                    |
| Lacima 2010 <sup>30</sup> | #2779   | 79 | Patients with presence of involuntary faecal leakage to formed stool with the following question:<br>Do you ever have involuntary leakage of solid or liquid stools? | 60.6                         | 85%           | 11                 |

\*) Number of low risk items in the Risk of Bias assessment (out of 20 items in total – See Table 5)

Table S13: Treatment characteristics in studies for patients with FI

| Study name                                  | Endnote | Treatment                                                                                    | Further details of intervention                                                                                                                                                                                                                                                                                                                                                                                                                                                                                                                                                                                                                                                                                                                                                                                                                                                                                                                                                           | Duration of treatment                                                                                                                                                                          |
|---------------------------------------------|---------|----------------------------------------------------------------------------------------------|-------------------------------------------------------------------------------------------------------------------------------------------------------------------------------------------------------------------------------------------------------------------------------------------------------------------------------------------------------------------------------------------------------------------------------------------------------------------------------------------------------------------------------------------------------------------------------------------------------------------------------------------------------------------------------------------------------------------------------------------------------------------------------------------------------------------------------------------------------------------------------------------------------------------------------------------------------------------------------------------|------------------------------------------------------------------------------------------------------------------------------------------------------------------------------------------------|
| <b>WOMEN</b>                                |         |                                                                                              |                                                                                                                                                                                                                                                                                                                                                                                                                                                                                                                                                                                                                                                                                                                                                                                                                                                                                                                                                                                           |                                                                                                                                                                                                |
| <b>WOMEN – Biofeedback</b>                  |         |                                                                                              |                                                                                                                                                                                                                                                                                                                                                                                                                                                                                                                                                                                                                                                                                                                                                                                                                                                                                                                                                                                           |                                                                                                                                                                                                |
| Byrne 2007                                  | #3856   | Biofeedback                                                                                  | They were then scheduled to have six 20-minute biofeedback exercise treatment sessions by the same nurse at monthly intervals.                                                                                                                                                                                                                                                                                                                                                                                                                                                                                                                                                                                                                                                                                                                                                                                                                                                            | 6 months                                                                                                                                                                                       |
| Damon 2014                                  | #1373   | Biofeedback: Perineal retraining, including biofeedback, in addition to standard treatments. | These 20 sessions included 5 initial sessions dealing with education, optimization of rectal evacuation (anal relaxation, body position, and gentle squeezing pressure), and rectal sensitivity (rectal isovolumic distension testing in order to decrease the first sensation threshold into normal ranges). The retraining of anal voluntary squeeze and abdominal and pelvic coordination completed them. The following 15 sessions aimed at acquiring competence at anal voluntary squeeze and at abdominal and pelvic coordination (manual techniques, BFB with anal device, and abdominal breathing). The squeezing exercises combined long-duration contractions and short-duration contractions using a biofeedback device. Each series of contractions was separated from the other by a resting period of which the duration was twice as long as the squeezing period. These sessions were completed by daily home-based anal exercises combining short and long contractions. | 20 sessions of 30 min with the physiotherapist, all performed within a 4-month period at an initial rate of 2–3 sessions per week for the first 4 weeks, and 1–2 sessions per week thereafter. |
| <b>WOMEN – Sacral nerve/Neuromodulation</b> |         |                                                                                              |                                                                                                                                                                                                                                                                                                                                                                                                                                                                                                                                                                                                                                                                                                                                                                                                                                                                                                                                                                                           |                                                                                                                                                                                                |
| Boyle 2011                                  | #2320   | Sacral nerve stimulation                                                                     | Patients underwent unilateral PNE with the percutaneous insertion of a stimulating electrode (3065USC; Medtronic, Minneapolis, MN) into the sacral foramen under general or local anaesthesia. Those who experienced significantly reduced FI with temporary SNS subsequently underwent permanent stimulation with a unilateral tined lead and pulse generator.                                                                                                                                                                                                                                                                                                                                                                                                                                                                                                                                                                                                                           | NR                                                                                                                                                                                             |
| Paquette 2014                               | #6392   | Sacral nerve stimulation                                                                     | InterStim system (Medtronic: Minneapolis, MN)                                                                                                                                                                                                                                                                                                                                                                                                                                                                                                                                                                                                                                                                                                                                                                                                                                                                                                                                             | 12 months                                                                                                                                                                                      |
| Tijandra 2008                               | #11675  | Sacral nerve stimulation                                                                     | Medtronic Interstim™ model 3625, Minneapolis, MN; a; procedure of implantation                                                                                                                                                                                                                                                                                                                                                                                                                                                                                                                                                                                                                                                                                                                                                                                                                                                                                                            | 12 months                                                                                                                                                                                      |
| Wexner 2010                                 | #2918   | Sacral nerve stimulation                                                                     | Interstim system (Medtronic: Minneapolis, MN); procedure and programming was described                                                                                                                                                                                                                                                                                                                                                                                                                                                                                                                                                                                                                                                                                                                                                                                                                                                                                                    | 28 months                                                                                                                                                                                      |
| Uludag 2011                                 | #2304   | Sacral                                                                                       | No details provided, only referred to reference 14.                                                                                                                                                                                                                                                                                                                                                                                                                                                                                                                                                                                                                                                                                                                                                                                                                                                                                                                                       | NR                                                                                                                                                                                             |

| Study name                                     | Endnote | Treatment                                           | Further details of intervention                                                                                                                                                                                                                                                                                                                                                                                                                                                                                                                                                                                                                                                                                                                                       | Duration of treatment |
|------------------------------------------------|---------|-----------------------------------------------------|-----------------------------------------------------------------------------------------------------------------------------------------------------------------------------------------------------------------------------------------------------------------------------------------------------------------------------------------------------------------------------------------------------------------------------------------------------------------------------------------------------------------------------------------------------------------------------------------------------------------------------------------------------------------------------------------------------------------------------------------------------------------------|-----------------------|
|                                                |         | neuromodulation                                     |                                                                                                                                                                                                                                                                                                                                                                                                                                                                                                                                                                                                                                                                                                                                                                       |                       |
| <b>WOMEN – Periferal Stimulation</b>           |         |                                                     |                                                                                                                                                                                                                                                                                                                                                                                                                                                                                                                                                                                                                                                                                                                                                                       |                       |
| Leroi 2012                                     | #9773   | TENS                                                | Self-adhesive surface stimulation electrodes connected to a TENS Eco Program P3 stimulator (Schwa Medico, Ehringshausen, Germany); 20-min stimulation sessions twice daily for 3 months                                                                                                                                                                                                                                                                                                                                                                                                                                                                                                                                                                               | 3 months              |
| <b>WOMEN – Drug treatments</b>                 |         |                                                     |                                                                                                                                                                                                                                                                                                                                                                                                                                                                                                                                                                                                                                                                                                                                                                       |                       |
| Sze 2009                                       | #3161   | Methylcellulose (Citrucel) and loperamide (Imodium) | One heaping tablespoon of methylcellulose twice a day, which was increased to two heaping tablespoons twice a day as needed. If the incontinence persisted after taking maximum dose of methylcellulose for two weeks, an antidiarrhoeal agent, loperamide, one capsule twice a day was added, which was increased to two capsules three times a day as needed. If faecal urgency and incontinence resolved, the therapy was continued for a three-month treatment period. If faecal urgency and/or incontinence recurred during the three-month treatment period, methylcellulose was increased and loperamide was added or increased as needed until faecal urgency and/or incontinence resolved or the maximum dose of fibre and antidiarrhoeal agent was reached. | 3 months              |
| <b>WOMEN – Standard conservative treatment</b> |         |                                                     |                                                                                                                                                                                                                                                                                                                                                                                                                                                                                                                                                                                                                                                                                                                                                                       |                       |
| Damon 2014                                     | #1373   | Standard conservative treatment                     | Not described                                                                                                                                                                                                                                                                                                                                                                                                                                                                                                                                                                                                                                                                                                                                                         | NR                    |
| <b>WOMEN – Bulking Agents</b>                  |         |                                                     |                                                                                                                                                                                                                                                                                                                                                                                                                                                                                                                                                                                                                                                                                                                                                                       |                       |
| Graf 2011                                      | #10132  | Biomaterial injection                               | Dextranomer in stabilised hyaluronic acid (NASHA Dx)                                                                                                                                                                                                                                                                                                                                                                                                                                                                                                                                                                                                                                                                                                                  | NR                    |
| <b>MEN</b>                                     |         |                                                     |                                                                                                                                                                                                                                                                                                                                                                                                                                                                                                                                                                                                                                                                                                                                                                       |                       |
| <b>MEN – Biofeedback</b>                       |         |                                                     |                                                                                                                                                                                                                                                                                                                                                                                                                                                                                                                                                                                                                                                                                                                                                                       |                       |
| Lacima 2010                                    | #2779   | Biofeedback                                         | Training sessions consisting of strength training, sensory training, and coordination training. Each session took 45 min and the number of sessions each patient received was five. Additional sessions were given in selected cases. The first three were for every two weeks and subsequent sessions were for every month.                                                                                                                                                                                                                                                                                                                                                                                                                                          | NR                    |

Table S14: Results of interventions for patients with FI

| Study name                                  | Endnote | Intervention                                                                                | N   | Follow-up period | Type of outcome           | Outcome description                                                                                                                  | With or without containment products | % of patients with outcome |
|---------------------------------------------|---------|---------------------------------------------------------------------------------------------|-----|------------------|---------------------------|--------------------------------------------------------------------------------------------------------------------------------------|--------------------------------------|----------------------------|
| <b>WOMEN – Biofeedback</b>                  |         |                                                                                             |     |                  |                           |                                                                                                                                      |                                      |                            |
| Byrne 2007                                  | #3856   | Biofeedback                                                                                 | 385 | 6m               | Much improved (objective) | NR                                                                                                                                   | NR                                   | 30%                        |
| Byrne 2007                                  | #3856   | Biofeedback                                                                                 | 385 | 6m               | Improved (Objective)      | NR                                                                                                                                   | NR                                   | 38%                        |
| Byrne 2007                                  | #3856   | Biofeedback                                                                                 | 385 | 6m               | Improved (Subjective)     | NR                                                                                                                                   | NR                                   | 78%                        |
| Damon 2014                                  | #1373   | Biofeedback: Perineal retraining, including biofeedback, in addition to standard treatments | 67  | 4m               | Success                   | Self-evaluated improvement was the primary outcome measure. A score $\geq 3$ (in an improvement scale from -5 to +5) defined success | NR                                   | 57%                        |
| <b>WOMEN – Sacral nerve/Neuromodulation</b> |         |                                                                                             |     |                  |                           |                                                                                                                                      |                                      |                            |
| Boyle 2011                                  | #2320   | Sacral nerve stimulation                                                                    | 50  | 3m               | Success                   | Decrease of at least 50% in the number of incontinence episodes seen during peripheral nerve evaluation (PNE)                        | NR                                   | 54.0%                      |
| Boyle 2011                                  | #2320   | Sacral nerve stimulation                                                                    | 50  | 17m              | Success                   | Decrease of at least 50% in the number of incontinence episodes seen during peripheral nerve evaluation (PNE)                        | NR                                   | 54.0%                      |
| Boyle 2011                                  | #2320   | Sacral nerve stimulation                                                                    | 50  | 17m              | Cure                      | No episodes of Faecal Incontinence during the 2-week monitoring period                                                               | NR                                   | 26.0%                      |
| Paquette 2014                               | #6392   | Sacral nerve stimulation                                                                    | 111 | 12m              | Subjective Wexner score   | 75-100% improvement                                                                                                                  | NR                                   | 70.0%                      |
| Paquette 2014                               | #6392   | Sacral nerve stimulation                                                                    | 111 | 12 m             | Subjective Wexner score   | >50 improvement                                                                                                                      | NR                                   | 93.0%                      |



| Study name    | Endnote | Intervention             | N  | Follow-up period | Type of outcome      | Outcome description                                               | With or without containment products | % of patients with outcome |
|---------------|---------|--------------------------|----|------------------|----------------------|-------------------------------------------------------------------|--------------------------------------|----------------------------|
| Tijandra 2008 | #11675  | Sacral nerve stimulation | 53 | 3m               | Improvement - 100%   | 100% improvement in incontinence episodes per week                | NR                                   | 38.6%                      |
| Tijandra 2008 | #11675  | Sacral nerve stimulation | 53 | 6m               | Improvement - 100%   | 100% improvement in incontinence episodes per week                | NR                                   | 31.7%                      |
| Tijandra 2008 | #11675  | Sacral nerve stimulation | 53 | 12m              | Improvement - 100%   | 100% improvement in incontinence episodes per week                | NR                                   | 41.5%                      |
| Tijandra 2008 | #11675  | Sacral nerve stimulation | 53 | 3m               | Improvement - 75-99% | reductions of 75-99%, from baseline in incontinence episodes/week | NR                                   | 11.4%                      |
| Tijandra 2008 | #11675  | Sacral nerve stimulation | 53 | 6m               | Improvement - 75-99% | reductions of 75-99%, from baseline in incontinence episodes/week | NR                                   | 26.8%                      |
| Tijandra 2008 | #11675  | Sacral nerve stimulation | 53 | 12m              | Improvement - 75-99% | reductions of 75-99%, from baseline in incontinence episodes/week | NR                                   | 24.4%                      |
| Tijandra 2008 | #11675  | Sacral nerve stimulation | 53 | 3m               | Improvement - 50-74% | reductions of 50-74%, from baseline in incontinence episodes/week | NR                                   | 22.7%                      |
| Tijandra 2008 | #11675  | Sacral nerve stimulation | 53 | 6m               | Improvement - 50-74% | reductions of 50-74%, from baseline in incontinence episodes/week | NR                                   | 17.1%                      |
| Tijandra 2008 | #11675  | Sacral nerve stimulation | 53 | 12m              | Improvement - 50-74% | reductions of 50-74%, from baseline in incontinence episodes/week | NR                                   | 4.9%                       |
| Tijandra 2008 | #11675  | Sacral nerve stimulation | 53 | 3m               | Improvement - <50%   | reductions of <50%, from baseline in incontinence episodes/week   | NR                                   | 27.3%                      |
| Tijandra 2008 | #11675  | Sacral nerve stimulation | 53 | 6m               | Improvement - <50%   | reductions of <50%, from baseline in incontinence episodes/week   | NR                                   | 24.4%                      |
| Tijandra 2008 | #11675  | Sacral nerve stimulation | 53 | 12m              | Improvement - <50%   | reductions of <50%, from baseline in incontinence episodes/week   | NR                                   | 29.3%                      |
| Tijandra 2008 | #11675  | Sacral nerve stimulation | 53 | 3m               | Improvement - 100%   | 100% improvement in days with incontinence per week               | NR                                   | 51.1%                      |

| Study name    | Endnote | Intervention             | N  | Follow-up period | Type of outcome      | Outcome description                                                    | With or without containment products | % of patients with outcome |
|---------------|---------|--------------------------|----|------------------|----------------------|------------------------------------------------------------------------|--------------------------------------|----------------------------|
| Tijandra 2008 | #11675  | Sacral nerve stimulation | 53 | 6m               | Improvement - 100%   | 100% improvement in days with incontinence per week                    | NR                                   | 40.9%                      |
| Tijandra 2008 | #11675  | Sacral nerve stimulation | 53 | 12m              | Improvement - 100%   | 100% improvement in days with incontinence per week                    | NR                                   | 38.1%                      |
| Tijandra 2008 | #11675  | Sacral nerve stimulation | 53 | 3m               | Improvement - 75-99% | reductions of 75-99%, from baseline in days with incontinence per week | NR                                   | 8.9%                       |
| Tijandra 2008 | #11675  | Sacral nerve stimulation | 53 | 6m               | Improvement - 75-99% | reductions of 75-99%, from baseline in days with incontinence per week | NR                                   | 15.9%                      |
| Tijandra 2008 | #11675  | Sacral nerve stimulation | 53 | 12m              | Improvement - 75-99% | reductions of 75-99%, from baseline in days with incontinence per week | NR                                   | 16.7%                      |
| Tijandra 2008 | #11675  | Sacral nerve stimulation | 53 | 3m               | Improvement - 50-74% | reductions of 50-74%, from baseline in days with incontinence per week | NR                                   | 8.9%                       |
| Tijandra 2008 | #11675  | Sacral nerve stimulation | 53 | 6m               | Improvement - 50-74% | reductions of 50-74%, from baseline in days with incontinence per week | NR                                   | 11.4%                      |
| Tijandra 2008 | #11675  | Sacral nerve stimulation | 53 | 12m              | Improvement - 50-74% | Reductions of 50-74%, from baseline in days with incontinence per week | NR                                   | 9.5%                       |
| Tijandra 2008 | #11675  | Sacral nerve stimulation | 53 | 3m               | Improvement - <50%   | reductions of <50%, from baseline in days with incontinence per week   | NR                                   | 31.1%                      |
| Tijandra 2008 | #11675  | Sacral nerve stimulation | 53 | 6m               | Improvement - <50%   | reductions of <50%, from baseline in days with incontinence per week   | NR                                   | 31.8%                      |
| Tijandra 2008 | #11675  | Sacral nerve stimulation | 53 | 12m              | Improvement - <50%   | reductions of <50%, from baseline in days with incontinence per week   | NR                                   | 35.7%                      |
| Tijandra 2008 | #11675  | Sacral nerve stimulation | 53 | 12 m             | Cure                 | Continence                                                             | NR                                   | 47.2%                      |

| Study name  | Endnote | Intervention             | N   | Follow-up period | Type of outcome         | Outcome description                     | With or without containment products | % of patients with outcome |
|-------------|---------|--------------------------|-----|------------------|-------------------------|-----------------------------------------|--------------------------------------|----------------------------|
| Wexner 2010 | #2918   | Sacral nerve stimulation | 113 | 3m               | Cure                    | Total continence (FI episodes per week) | NR                                   | 38.9%                      |
| Wexner 2010 | #2918   | Sacral nerve stimulation | 107 | 6m               | Cure                    | Total continence (FI episodes per week) | NR                                   | 39.3%                      |
| Wexner 2010 | #2918   | Sacral nerve stimulation | 106 | 12m              | Cure                    | Total continence (FI episodes per week) | NR                                   | 40.6%                      |
| Wexner 2010 | #2918   | Sacral nerve stimulation | 67  | 24m              | Cure                    | Total continence (FI episodes per week) | NR                                   | 37.3%                      |
| Wexner 2010 | #2918   | Sacral nerve stimulation | 113 | 3m               | Improvement 75% to 100% | Improvement in FI episodes per week     | NR                                   | 29.2%                      |
| Wexner 2010 | #2918   | Sacral nerve stimulation | 107 | 6m               | Improvement 75% to 100% | Improvement in FI episodes per week     | NR                                   | 31.8%                      |
| Wexner 2010 | #2918   | Sacral nerve stimulation | 106 | 12m              | Improvement 75% to 100% | Improvement in FI episodes per week     | NR                                   | 28.3%                      |
| Wexner 2010 | #2918   | Sacral nerve stimulation | 67  | 24m              | Improvement 75% to 100% | Improvement in FI episodes per week     | NR                                   | 34.3%                      |
| Wexner 2010 | #2918   | Sacral nerve stimulation | 113 | 3m               | Improvement 50% to 75%  | Improvement in FI episodes per week     | NR                                   | 16.8%                      |
| Wexner 2010 | #2918   | Sacral nerve stimulation | 107 | 6m               | Improvement 50% to 75%  | Improvement in FI episodes per week     | NR                                   | 17.8%                      |
| Wexner 2010 | #2918   | Sacral nerve stimulation | 106 | 12m              | Improvement 50% to 75%  | Improvement in FI episodes per week     | NR                                   | 14.2%                      |
| Wexner 2010 | #2918   | Sacral nerve stimulation | 67  | 24m              | Improvement 50% to 75%  | Improvement in FI episodes per week     | NR                                   | 13.4%                      |

| Study name  | Endnote | Intervention             | N   | Follow-up period | Type of outcome       | Outcome description                                                                          | With or without containment products | % of patients with outcome |
|-------------|---------|--------------------------|-----|------------------|-----------------------|----------------------------------------------------------------------------------------------|--------------------------------------|----------------------------|
| Wexner 2010 | #2918   | Sacral nerve stimulation | 113 | 3m               | Improvement 0% to 50% | Improvement in FI episodes per week                                                          | NR                                   | 8.9%                       |
| Wexner 2010 | #2918   | Sacral nerve stimulation | 107 | 6m               | Improvement 0% to 50% | Improvement in FI episodes per week                                                          | NR                                   | 7.5%                       |
| Wexner 2010 | #2918   | Sacral nerve stimulation | 106 | 12m              | Improvement 0% to 50% | Improvement in FI episodes per week                                                          | NR                                   | 9.4%                       |
| Wexner 2010 | #2918   | Sacral nerve stimulation | 67  | 24m              | Improvement 0% to 50% | Improvement in FI episodes per week                                                          | NR                                   | 7.5%                       |
| Wexner 2010 | #2918   | Sacral nerve stimulation | 113 | 3m               | Improvement >50%      | Weekly incontinent episodes                                                                  | NR                                   | 85.0%                      |
| Wexner 2010 | #2918   | Sacral nerve stimulation | 107 | 6m               | Improvement >50%      | Weekly incontinent episodes                                                                  | NR                                   | 89.0%                      |
| Wexner 2010 | #2918   | Sacral nerve stimulation | 106 | 12m              | Improvement >50%      | Weekly incontinent episodes                                                                  | NR                                   | 83.0%                      |
| Wexner 2010 | #2918   | Sacral nerve stimulation | 67  | 24m              | Improvement >50%      | Weekly incontinent episodes                                                                  | NR                                   | 85.0%                      |
| Wexner 2010 | #2918   | Sacral nerve stimulation | 113 | 3m               | Improvement >50%      | Weekly urgent incontinent episodes                                                           | NR                                   | 80.0%                      |
| Wexner 2010 | #2918   | Sacral nerve stimulation | 107 | 6m               | Improvement >50%      | Weekly urgent incontinent episodes                                                           | NR                                   | 83.0%                      |
| Wexner 2010 | #2918   | Sacral nerve stimulation | 106 | 12m              | Improvement >50%      | Weekly urgent incontinent episodes                                                           | NR                                   | 80.0%                      |
| Wexner 2010 | #2918   | Sacral nerve stimulation | 67  | 24m              | Improvement >50%      | Weekly urgent incontinent episodes                                                           | NR                                   | 79.0%                      |
| Wexner 2010 | #1791   | Sacral nerve stimulation | 72  | 3m               | Success rate          | At least a 50% improvement from baseline in weekly incontinent episodes in bowel diary data. | NR                                   | 90.0%                      |

| Study name  | Endnote | Intervention             | N  | Follow-up period | Type of outcome | Outcome description                                                                          | With or without containment products | % of patients with outcome |
|-------------|---------|--------------------------|----|------------------|-----------------|----------------------------------------------------------------------------------------------|--------------------------------------|----------------------------|
| Wexner 2010 | #1791   | Sacral nerve stimulation | 72 | 3m               | Cure            | Achievement of total continence                                                              | NR                                   | 43.1%                      |
| Wexner 2010 | #1791   | Sacral nerve stimulation | 71 | 6m               | Success rate    | At least a 50% improvement from baseline in weekly incontinent episodes in bowel diary data. | NR                                   | 96.0%                      |
| Wexner 2010 | #1791   | Sacral nerve stimulation | 71 | 6m               | Cure            | Achievement of total continence                                                              | NR                                   | 45.1%                      |
| Wexner 2010 | #1791   | Sacral nerve stimulation | 73 | 1y               | Success rate    | At least a 50% improvement from baseline in weekly incontinent episodes in bowel diary data. | NR                                   | 89.0%                      |
| Wexner 2010 | #1791   | Sacral nerve stimulation | 73 | 1y               | Cure            | Achievement of total continence                                                              | NR                                   | 45.1%                      |
| Wexner 2010 | #1791   | Sacral nerve stimulation | 66 | 2y               | Success rate    | At least a 50% improvement from baseline in weekly incontinent episodes in bowel diary data. | NR                                   | 91.0%                      |
| Wexner 2010 | #1791   | Sacral nerve stimulation | 66 | 2y               | Cure            | Achievement of total continence                                                              | NR                                   | 39.4%                      |
| Wexner 2010 | #1791   | Sacral nerve stimulation | 72 | 3y               | Success rate    | At least a 50% improvement from baseline in weekly incontinent episodes in bowel diary data. | NR                                   | 89.0%                      |
| Wexner 2010 | #1791   | Sacral nerve stimulation | 72 | 3y               | Cure            | Achievement of total continence                                                              | NR                                   | 41.7%                      |
| Wexner 2010 | #1791   | Sacral nerve stimulation | 73 | 4y               | Success rate    | At least a 50% improvement from baseline in weekly incontinent episodes in bowel diary data. | NR                                   | 88.0%                      |
| Wexner 2010 | #1791   | Sacral nerve stimulation | 73 | 4y               | Cure            | Achievement of total continence                                                              | NR                                   | 35.6%                      |
| Wexner 2010 | #1791   | Sacral nerve stimulation | 72 | 5y               | Success rate    | At least a 50% improvement from baseline in weekly incontinent episodes in bowel diary data. | NR                                   | 89.0%                      |
| Wexner 2010 | #1791   | Sacral nerve stimulation | 72 | 5y               | Cure            | Achievement of total continence                                                              | NR                                   | 36.1%                      |

| Study name                                     | Endnote | Intervention                                        | N   | Follow-up period | Type of outcome        | Outcome description                                                                                                                                                                                                                                                                                                     | With or without containment products | % of patients with outcome |
|------------------------------------------------|---------|-----------------------------------------------------|-----|------------------|------------------------|-------------------------------------------------------------------------------------------------------------------------------------------------------------------------------------------------------------------------------------------------------------------------------------------------------------------------|--------------------------------------|----------------------------|
| Uludag 2011                                    | #2304   | Sacral neuromodulation                              | 50  | 7y               | Improvement            | Decrease of at least 50% in the number of incontinence episodes seen during peripheral nerve evaluation (PNE)                                                                                                                                                                                                           | NR                                   | 84.0%                      |
| <b>WOMEN – Periferal Stimulation</b>           |         |                                                     |     |                  |                        |                                                                                                                                                                                                                                                                                                                         |                                      |                            |
| Leroi 2012                                     | #9773   | TENS                                                | 66  | 3 mo             | Subjective cure        | Cleveland Clinic Continence Scoring System score 0                                                                                                                                                                                                                                                                      | NR                                   | 6%                         |
| Leroi 2012                                     | #9773   | TENS                                                | 66  | 3 mo             | Subjective improvement | > 30 % decrease in CCS score                                                                                                                                                                                                                                                                                            | NR                                   | 47%                        |
| <b>WOMEN – Drug treatments</b>                 |         |                                                     |     |                  |                        |                                                                                                                                                                                                                                                                                                                         |                                      |                            |
| Sze 2009                                       | #3161   | Methylcellulose (Citrucel) and loperamide (Imodium) | 59  | 3m               | Cure                   | Patient stated that her incontinence was cured, had zero Pescatori incontinence point, resolution of faecal urgency, did not use a perineal pad for protection, and her incontinence did not have any effect on her emotional, social, occupational, and physical functions during the treatment or observation period. | Without                              | 46%                        |
| <b>WOMEN – Standard conservative treatment</b> |         |                                                     |     |                  |                        |                                                                                                                                                                                                                                                                                                                         |                                      |                            |
| Damon 2014                                     | #1373   | Standard conservative treatment (control)           | 75  | 4m               | Success                | Self-evaluated improvement was the primary outcome measure. A score $\geq 3$ (in an improvement scale from -5 to +5) defined success                                                                                                                                                                                    | NR                                   | 37%                        |
| <b>WOMEN – Bulking Agents</b>                  |         |                                                     |     |                  |                        |                                                                                                                                                                                                                                                                                                                         |                                      |                            |
| Graf 2011                                      | #10132  | Biomaterial injection                               | 132 | 6m               | Improvement (response) | A reduction in number of episodes by 50% or more compared with baseline                                                                                                                                                                                                                                                 | NR                                   | 52.7%                      |
| Graf 2011                                      | #10132  | Biomaterial injection                               | 125 | 12m              | Improvement (response) | A reduction in number of episodes by 25% or more compared with baseline                                                                                                                                                                                                                                                 | NR                                   | 69.1%                      |

| Study name               | Endnote | Intervention | N  | Follow-up period | Type of outcome | Outcome description                                                  | With or without containment products | % of patients with outcome |
|--------------------------|---------|--------------|----|------------------|-----------------|----------------------------------------------------------------------|--------------------------------------|----------------------------|
| <b>MEN</b>               |         |              |    |                  |                 |                                                                      |                                      |                            |
| <b>MEN – Biofeedback</b> |         |              |    |                  |                 |                                                                      |                                      |                            |
| Lacima 2010              | #2779   | Biofeedback  | 53 | 6m               | Cure            | Continence fully recovered                                           | NR                                   | 40.80%                     |
| Lacima 2010              | #2779   | Biofeedback  | 53 | 6m               | Improvement     | Reduction in the number of episodes of incontinence greater than 75% | NR                                   | 47.90%                     |
| Lacima 2010              | #2779   | Biofeedback  | 53 | 3y               | Cure            | Continence fully recovered                                           | NR                                   | 35.80%                     |
| Lacima 2010              | #2779   | Biofeedback  | 31 | 3y               | Improvement     | Reduction in the number of episodes of incontinence greater than 75% | NR                                   | 47.20%                     |
| Lacima 2010              | #2779   | Biofeedback  | 31 | 5y               | Cure            | Continence fully recovered                                           | NR                                   | 29%                        |
| Lacima 2010              | #2779   | Biofeedback  | 31 | 5y               | Improvement     | Reduction in the number of episodes of incontinence greater than 75% | NR                                   | 61.30%                     |

Table S15: Study characteristics for patients with neurological problems or diseases

| Study name                 | Endnote | N   | Inclusion criteria                                                                                                                                                                                                                                                                                                                                                                                                                                                                                                                                                                                                                                                                                                                                                                                                                                                                                                                                                                                                                                                     | Mean/<br>Median<br>age (yrs) | % of<br>males | RoB<br>No.<br>Low* |
|----------------------------|---------|-----|------------------------------------------------------------------------------------------------------------------------------------------------------------------------------------------------------------------------------------------------------------------------------------------------------------------------------------------------------------------------------------------------------------------------------------------------------------------------------------------------------------------------------------------------------------------------------------------------------------------------------------------------------------------------------------------------------------------------------------------------------------------------------------------------------------------------------------------------------------------------------------------------------------------------------------------------------------------------------------------------------------------------------------------------------------------------|------------------------------|---------------|--------------------|
| <b>WOMEN</b>               |         |     |                                                                                                                                                                                                                                                                                                                                                                                                                                                                                                                                                                                                                                                                                                                                                                                                                                                                                                                                                                                                                                                                        |                              |               |                    |
| Leroi 2012 <sup>16</sup>   | #9773   | 66  | Patients with FI>3 months; failure of conservative treatments; not a candidate for conservative treatments; ≥ 18 years of age                                                                                                                                                                                                                                                                                                                                                                                                                                                                                                                                                                                                                                                                                                                                                                                                                                                                                                                                          | 60 (med)                     | 7%            | 18                 |
| Sussman 2013 <sup>39</sup> | #11682  | 166 | 18 to 80 years of age with NDO (due to MS or SCI) and 14 UI episodes/week who were not adequately managed by anticholinergics (defined as an inadequate response or intolerable side effects after at least 1 month of an optimized dose).                                                                                                                                                                                                                                                                                                                                                                                                                                                                                                                                                                                                                                                                                                                                                                                                                             | 45                           | 42.1%         | 15                 |
| Thomas 2014 <sup>38</sup>  | #15557  | 330 | "Stroke services: specialist acute and rehabilitation services (either separate or combined units). Patients: >= 18 years; a diagnosis of stroke based on the World Health Organisation (WHO) criteria; UI as defined by the International Continence Society as 'involuntary loss of urine' and classified as stress UI (any response other than 'never' to the Leicester Urinary Symptom questionnaire (LUSQ) question 'Do you ever leak when you do any of the following?'), urge UI (the response 'most of the time', 'sometimes' or 'occasionally' to the LUSQ question 'When you get the urge to pass urine, does any leak before you get to the toilet?'), mixed UI (both stress and urge UI) or 'functional' UI, defined as mobility or balance restrictions stopping patients reaching the toilet on time or presence of indwelling catheter in the acute phase of the stroke; Conscious (defined as either 'alert' or 'drowsy' on the 'Clinical Status on Admission' item of the European Stroke Database); Medically stable as judged by the clinical team" | 79 (Med)                     | 46%           | 9                  |
| Faaborg 2009 <sup>37</sup> | #13213  | 211 | Neurological bowel disease; failed conservative treatment                                                                                                                                                                                                                                                                                                                                                                                                                                                                                                                                                                                                                                                                                                                                                                                                                                                                                                                                                                                                              | 49 (Med)                     | 45%           | 9                  |

\*) Number of low risk items in the Risk of Bias assessment (out of 20 items in total – See Table 5)



Table S16: Treatment characteristics in studies for patients with neurological problems or diseases

| Study name                           | Endnote | Treatment                          | Further details of intervention                                                                                                                                                                          | Duration of treatment |
|--------------------------------------|---------|------------------------------------|----------------------------------------------------------------------------------------------------------------------------------------------------------------------------------------------------------|-----------------------|
| <b>WOMEN</b>                         |         |                                    |                                                                                                                                                                                                          |                       |
| <b>WOMEN – Botulinum Toxin</b>       |         |                                    |                                                                                                                                                                                                          |                       |
| Sussman 2013                         | #11682  | Onabotulinumtoxin A 200U           | Administered via cystoscopy, avoiding the trigone                                                                                                                                                        | 12 wks                |
| Sussman 2013                         | #11682  | Onabotulinumtoxin A 300U           | Administered via cystoscopy, avoiding the trigone                                                                                                                                                        | 12 wks                |
| <b>WOMEN – Periferal Stimulation</b> |         |                                    |                                                                                                                                                                                                          |                       |
| Leroi 2012                           | #9773   | TENS                               | Self-adhesive surface stimulation electrodes connected to a TENS Eco Program P3 stimulator (Schwa Medico, Ehringshausen, Germany); 20-min stimulation sessions twice daily for 3 months                  | 3 months              |
| <b>WOMEN – Transanal irrigation</b>  |         |                                    |                                                                                                                                                                                                          |                       |
| Faaborg 2009                         | #13213  | Transanal irrigation               | Instruction and then telephone contact; no other details                                                                                                                                                 | 19 months             |
| <b>WOMEN – Voiding programme</b>     |         |                                    |                                                                                                                                                                                                          |                       |
| Thomas 2014                          | #15557  | Systematic voiding programme (SVP) | detailed description on p. 3: Patients cognitively able received bladder training and those with cognitive impairment received prompted voiding                                                          | 12 wks                |
| Thomas 2014                          | #15557  | SVP and supported implementation   | detailed description pn p. 4: SVP introduced using an implementation strategy, facilitation, to assist the process of embedding into practice                                                            | 12 ws                 |
| <b>WOMEN – Other</b>                 |         |                                    |                                                                                                                                                                                                          |                       |
| Thomas 2014                          | #15557  | Usual continence care              | checking for urinary tract infection; checking for overflow incontinence; containment using a variety of products (for example absorbent pads) with regular changes; and some form of toileting schedule | 12 wks                |

Table S17: Results of interventions for patients with neurological problems or diseases

| Study name                     | Endnote | Intervention            | N  | Follow-up period | Type of outcome                                     | Outcome description                                                                                                             | With or without containment products | % of patients with outcome |
|--------------------------------|---------|-------------------------|----|------------------|-----------------------------------------------------|---------------------------------------------------------------------------------------------------------------------------------|--------------------------------------|----------------------------|
| <b>WOMEN – Botulinum Toxin</b> |         |                         |    |                  |                                                     |                                                                                                                                 |                                      |                            |
| Sussman 2013                   | #11682  | OnabotulinumtoxinA 200U | 85 | 12 wks           | Improvement I-QoL                                   | Proportion of patients who achieved a $\geq 11$ point increase from baseline on I-QoL scores, which is clinically meaningful.   | Without                              | 69.4%                      |
| Sussman 2013                   | #11682  | OnabotulinumtoxinA 300U | 81 | 12 wks           | Improvement I-QoL                                   | Same as above                                                                                                                   | Without                              | 65.4%                      |
| Sussman 2013                   | #11682  | OnabotulinumtoxinA 200U | 85 | 12 wks           | Improvement OAB-PSTQ Satisfaction                   | Treatment satisfaction: proportion of patients who reported feeling very or somewhat satisfied.                                 | Without                              | 70.6%                      |
| Sussman 2013                   | #11682  | OnabotulinumtoxinA 300U | 77 | 12 wks           | Improvement OAB-PSTQ Satisfaction                   | Same as above                                                                                                                   | Without                              | 70.1%                      |
| Sussman 2013                   | #11682  | OnabotulinumtoxinA 200U | 84 | 12 wks           | Improvement OAB-PSTQ Achievement of treatment goals | Achievement of treatment goals: proportion of patients who rated their progress as “significant” or “complete”                  | Without                              | 57.1%                      |
| Sussman 2013                   | #11682  | OnabotulinumtoxinA 300U | 78 | 12 wks           | Improvement OAB-PSTQ Achievement of treatment goals | Same as above                                                                                                                   | Without                              | 57.7%                      |
| Sussman 2013                   | #11682  | OnabotulinumtoxinA 200U | 84 | 12 wks           | Improvement OAB-PSTQ Met treatment expectations     | Meeting treatment expectations: proportion of patients rating their progress as “significantly met” or “exceeded” expectations. | Without                              | 57.1%                      |
| Sussman 2013                   | #11682  | OnabotulinumtoxinA 300U | 78 | 12 wks           | Improvement OAB-PSTQ Met treatment                  | Same as above                                                                                                                   | Without                              | 57.7%                      |

| Study name                           | Endnote | Intervention                       | N   | Follow-up period | Type of outcome        | Outcome description                                                                                           | With or without containment products | % of patients with outcome |
|--------------------------------------|---------|------------------------------------|-----|------------------|------------------------|---------------------------------------------------------------------------------------------------------------|--------------------------------------|----------------------------|
|                                      |         |                                    |     |                  | expectations           |                                                                                                               |                                      |                            |
| Sussman 2013                         | #11682  | OnabotulinumtoxinA 200U            | 85  | 12 wks           | Improvement in HRQoI   | QoI on PGA                                                                                                    | NR                                   | 45%                        |
| Sussman 2013                         | #11682  | OnabotulinumtoxinA 300U            | 78  | 12 wks           | Improvement in HRQoI   | QoI on PGA                                                                                                    | NR                                   | 50%                        |
| <b>WOMEN – Periferal Stimulation</b> |         |                                    |     |                  |                        |                                                                                                               |                                      |                            |
| Leroi 2012                           | #9773   | TENS                               | 66  | 3 mo             | Subjective cure        | Cleveland Clinic Continence Scoring System score 0                                                            | NR                                   | 6%                         |
| Leroi 2012                           | #9773   | TENS                               | 66  | 3 mo             | Subjective improvement | > 30 % decrease in CCS score                                                                                  | NR                                   | 47%                        |
| <b>WOMEN – Transanal irrigation</b>  |         |                                    |     |                  |                        |                                                                                                               |                                      |                            |
| Faaborg 2009                         | #13213  | Transanal irrigation               | 211 | 19m              | Cure                   | No longer need transanal irrigation                                                                           | NR                                   | 9%                         |
| <b>WOMEN – Voiding programme</b>     |         |                                    |     |                  |                        |                                                                                                               |                                      |                            |
| Thomas 2014                          | #15557  | systematic voiding programme (SVP) | 132 | 12 wks           | Cure                   | Absence of incontinence was defined as the response 'never' to question three, 'How often do you leak urine?' | Without                              | 41%                        |
| Thomas 2014                          | #15557  | SVP and supported implementation   | 100 | 12 wks           | Cure                   | Same as above                                                                                                 | Without                              | 31%                        |
| <b>WOMEN – Other</b>                 |         |                                    |     |                  |                        |                                                                                                               |                                      |                            |
| Thomas 2014                          | #15557  | usual continence care              | 98  | 12 wks           | Cure                   | Same as above                                                                                                 | Without                              | 30%                        |

Table S18: Study characteristics for elderly or cognitively impaired patients with incontinence

| Study name                  | Endnote | N   | Inclusion criteria                                                                                                                                                                                                                                                                                                                                                                                                                                                                                                   | Mean age (yrs) | % of males | RoB No. Low* |
|-----------------------------|---------|-----|----------------------------------------------------------------------------------------------------------------------------------------------------------------------------------------------------------------------------------------------------------------------------------------------------------------------------------------------------------------------------------------------------------------------------------------------------------------------------------------------------------------------|----------------|------------|--------------|
| Chapple 2007a <sup>24</sup> | #11920  | 266 | Men and women; age $\geq 65$ yrs; symptoms of OAB $\geq 6$ mo, recruited from various types of practices; capable of independent toileting and able to complete diary; completed at least 5 days of the 7-day diary during b-line period; OAB symptoms, including an average of $\geq 1$ urge UI/day and $\geq 10$ micrutions/day.                                                                                                                                                                                   | 72             | 22.6%      | 15           |
| Dubeau 2014 <sup>25</sup>   | # 15558 | 562 | Eligible men or women were 65 years old or older with self-reported UUI symptoms for $\geq 3$ months, a mean of 2 to 15 UUI episodes, 8 or more micturations per 24 hours on baseline 3-day bladder diary, and at least some moderate bladder related problem on the PPBC (Patient Perception of Bladder Condition) who were determined to be vulnerable (at risk of deteriorating health) by a score of 3 or more on the VES-13 at screening.                                                                       | 75             | 20%        | 16           |
| Liao 2013 <sup>26</sup>     | #15559  | 61  | Frail elderly ( $>65$ y) patients diagnosed with urodynamic IDO refractory to previous antimuscarinics for more than 3 months.                                                                                                                                                                                                                                                                                                                                                                                       | 76             | 56%        | 14           |
| Liao 2013 <sup>26</sup>     | #15559  | 63  | Elderly ( $>65$ y) patients without frailty, diagnosed with urodynamic IDO refractory to previous antimuscarinics for more than 3 months.                                                                                                                                                                                                                                                                                                                                                                            | 76             | 70%        | 14           |
| Wagg 2014 <sup>23</sup>     | #15549  | 305 | Male or female subjects $\geq 65$ years old with OAB symptoms (subject-reported) for $\geq 3$ months prior to Screening visit according to ICS guidelines, mean urinary frequency of $\geq 8$ micturations per 24 hours as verified by the micturition diary prior to Randomization/ Baseline visit, and mean number of urgency episodes per 24 hours as verified by the Screening micturition diary prior to Baseline (urgency episodes were defined as those with Urinary Sensation Scale [USS] rating $\geq 3$ ). | 72.3           | 46%        | 10           |

\*) Number of low risk items in the Risk of Bias assessment (out of 20 items in total – See Table 5)

Table S19: Treatment characteristics in studies for elderly or cognitively impaired patients with incontinence

| Study name                       | Endnote | Treatment                            | Further details of intervention                                                                                                                                                                                                                                                                                                                                         | Duration of treatment |
|----------------------------------|---------|--------------------------------------|-------------------------------------------------------------------------------------------------------------------------------------------------------------------------------------------------------------------------------------------------------------------------------------------------------------------------------------------------------------------------|-----------------------|
| <b>Elderly – Antimuscarinics</b> |         |                                      |                                                                                                                                                                                                                                                                                                                                                                         |                       |
| Wagg 2014                        | #15549  | Fesoterodine SR 4 mg or 8 mg tablets | Patients started on a dose of fesoterodine SR 4 mg or equivalent placebo QD. After 4 weeks patients were permitted a one-time dose increase to 8 mg, if needed, in order to further optimize their treatment. If they remained on the 4 mg dose after 4 weeks of treatment, they were permitted to increase their dose to 8 mg after 8 weeks of treatment if necessary. | 24 weeks              |
| Dubeau 2014                      | # 15558 | Fesoterodine                         | Fesoterodine 4mg dose. At week 4 visit could be increased to 8mg depending on efficacy and tolerability.                                                                                                                                                                                                                                                                | 12 wks                |
| Chapple 2007a                    | #11920  | Darifenacin                          | 7.5 up-titrated to 15 mg                                                                                                                                                                                                                                                                                                                                                | 12 wks                |
| <b>Elderly – Botulinum toxin</b> |         |                                      |                                                                                                                                                                                                                                                                                                                                                                         |                       |
| Liao 2013                        | #15559  | Botulinum toxin                      | OnabotulinumtoxinA 100U                                                                                                                                                                                                                                                                                                                                                 | Single procedure      |

Table S20: Results of interventions for elderly or cognitively impaired patients with incontinence

| Study name             | Endnote | Intervention               | N   | Follow-up period | Type of outcome         | Outcome description                                                                                                                                                                         | With or without containment products | % of patients with outcome |
|------------------------|---------|----------------------------|-----|------------------|-------------------------|---------------------------------------------------------------------------------------------------------------------------------------------------------------------------------------------|--------------------------------------|----------------------------|
| <b>Antimuscarinics</b> |         |                            |     |                  |                         |                                                                                                                                                                                             |                                      |                            |
| Wagg 2014              | #15549  | Fesoterodine Flexible Dose | 299 | 24w              | Improvement             | Patient Treatment Benefit Scale (PTBS) – % of subjects with improvement (responders) - Proportion of subjects who reported their treatment has improved (1= greatly improved, 2= improved). | NR                                   | 78.30%                     |
| Dubeau 2014            | # 15558 | Fesoterodine               | 256 | 12 wks           | Cure                    | Diary dry rate- proportion of subjects with 1 or more UUI episodes on baseline diary and no UUI episodes on posttreatment diary                                                             | Without                              | 50.8%                      |
| Chapple 2007a          | #11920  | Darifenacin                | 266 | 12 wks           | Cure                    | 3 day dry rate                                                                                                                                                                              | Without                              | 48.5%                      |
| Chapple 2007a          | #11920  | Darifenacin                | 266 | 12 wks           | Cure                    | 7 day dry rate                                                                                                                                                                              | Without                              | 32.7%                      |
| Chapple 2007a          | #11920  | Darifenacin                | 266 | 12 wks           | Improvement $\geq 90\%$ | Response - improvement in mean number of UUIE per week                                                                                                                                      | Without                              | 46%                        |
| Chapple 2007a          | #11920  | Darifenacin                | 266 | 12 wks           | Improvement $\geq 70\%$ | Response - improvement in mean number of UUIE per week                                                                                                                                      | Without                              | 58%                        |
| Chapple 2007a          | #11920  | Darifenacin                | 266 | 12 wks           | Improvement $\geq 50\%$ | Response - improvement in mean number of UUIE per week                                                                                                                                      | Without                              | 70%                        |
| Chapple 2007a          | #11920  | Darifenacin                | 266 | 12 wks           | Improvement $\geq 30\%$ | Response - improvement in mean number of UUIE per week                                                                                                                                      | Without                              | 76%                        |
| <b>Botulinum toxin</b> |         |                            |     |                  |                         |                                                                                                                                                                                             |                                      |                            |
| Liao 2013              | #15559  | OnabotulinumtoxinA         | 61  | 3m               | Success                 | Success rate- A Patient Perception of Bladder Condition decrease of 2 points was considered successful                                                                                      | Without                              | 83.4%                      |
| Liao 2013              | #15559  | OnabotulinumtoxinA         | 61  | 6m               | Success                 | Same as above                                                                                                                                                                               | Without                              | 44.9%                      |
| Liao 2013              | #15559  | OnabotulinumtoxinA         | 61  | 12m              | Success                 | Same as above                                                                                                                                                                               | Without                              | 6.82%                      |

|           |        |                    |    |     |         |               |         |       |
|-----------|--------|--------------------|----|-----|---------|---------------|---------|-------|
| Liao 2013 | #15559 | OnabotulinumtoxinA | 63 | 3m  | Success | Same as above | Without | 91.2% |
| Liao 2013 | #15559 | OnabotulinumtoxinA | 63 | 6m  | Success | Same as above | Without | 52.1% |
| Liao 2013 | #15559 | OnabotulinumtoxinA | 63 | 12m | Success | Same as above | Without | 22.3% |
